# Supplementary material for: The solvent-controlled chemoselective construction of C–S/S–S bonds via the Michael reaction/thiol coupling of quinoline-2-thiones
Source: Royal Society of Chemistry journal article supplement (doi:10.1039/c8ob02971g), 2019-01-01

## Supporting information

### **Solvent-Controlled Chemoselectively Constructing C-S/S-S Bonds via Michael Reaction/Thiol Coupling of Quinoline-2-thiones**

Xi Zhang,<sup>‡ a</sup> Tong-Lin Wang,<sup>‡ a</sup> Xiao-Jun Liu,<sup>a</sup> Xi-Cun Wang,<sup>a</sup> Zheng-Jun Quan<sup>\*a</sup>

*<sup>a</sup> Gansu International Scientific and Technological Cooperation Base of Water-Retention  
Chemical Functional Materials, College of Chemistry and Chemical Engineering,  
Northwest Normal University, Lanzhou, Gansu 730070, People's Republic of China.*

#### Table of Contents

|                                                                                     |    |
|-------------------------------------------------------------------------------------|----|
| 1. General Information .....                                                        | 2  |
| 2. Typical Procedure for the Synthesis of 3 .....                                   | 2  |
| 3. Typical Procedure for the Synthesis of 4 .....                                   | 2  |
| 4. Typical Procedure for the Synthesis of 6 .....                                   | 3  |
| 5. Spectroscopic Data of Compounds .....                                            | 4  |
| 6. Copies of <sup>1</sup> H NMR and <sup>13</sup> C NMR Spectra for Compounds ..... | 13 |

## 1. General Information

Unless otherwise noted, all commercially available compounds were used as provided without further purification.  $^1\text{H}$  NMR and  $^{13}\text{C}$  NMR data analyses were performed with a Varian Mercury plus-400 and Agilent 600 MHz DD2 instruments  $\text{CDCl}_3$  and  $\text{DMSO-}d_6$  as solvent and tetramethylsilane (TMS) as the internal standard were employed. Chemical shifts were reported in units (ppm) by assigning TMS resonance in the  $^1\text{H}$  NMR spectrum as 0.00 ppm. The data of  $^1\text{H}$  NMR was reported as follows: chemical shift, multiplicity (s = singlet, d = doublet, t = triplet, m = multiplet and br = broad), coupling constant (J values) in Hz and integration. Chemical shift for  $^{13}\text{C}$  NMR spectra were recorded in ppm from TMS using the central peak of  $\text{CDCl}_3$  (77.0 ppm) as the internal standard.  $^{19}\text{F}$  NMR spectra were recorded on a Varian Mercury 400 plus instrument. Flash chromatography was performed using 200-300 mesh silica gel with the indicated solvent system according to standard techniques. Analytical thin-layer chromatography (TLC) was performed on pre-coated, glass-backed silica gel plates. Melting points were measured with an XT-4 apparatus. High-resolution mass spectra (HRMS) (ESI) were obtained with a Bruker Daltonics APEX II 47e and Orbitrap Elite mass spectrometer. Column chromatography was generally performed on silica gel (200-300 mesh) and TLC analyses were conducted on silica gel GF254 plates. All reagents were directly used from purchased without any further purification unless otherwise specified.

## 2. Typical Procedure for the Synthesis of 3

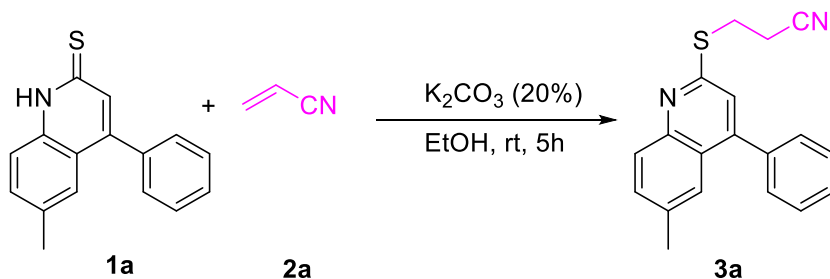

The mixture of quinoline-2-thione **1a** (0.2 mmol, 50 mg), acrylonitrile **2a** (0.24 mmol, 13 mg) and  $\text{K}_2\text{CO}_3$  (20%, 6 mg) in EtOH (2 mL) was stirred at room temperature for 5 hours under air atmosphere. After the reaction completed (monitored by TLC analysis), saturated aq.  $\text{NH}_4\text{Cl}$  was added to the mixture to quench the reaction and extracted with ethyl acetate (3×25 mL). The combined organic layers were washed with aqueous  $\text{NaHCO}_3$  and brine, dried over  $\text{MgSO}_4$ , filtered, and the volatiles were removed in vacuum. The mixture was purified by using silica gel column chromatography (ethyl acetate: petroleum ether = 1:30). The corresponding product **3a** was obtained as a white solid (55 mg, 90% yield).

## 3. Typical Procedure for the Synthesis of 4

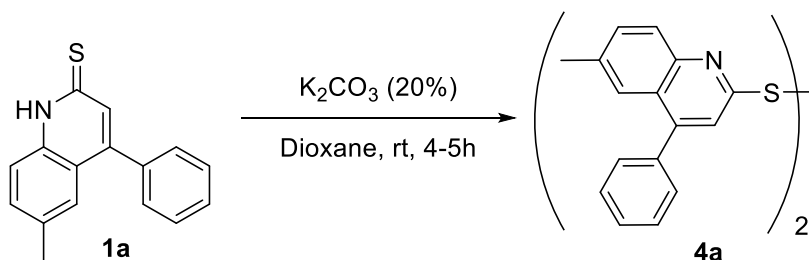

The mixture of Quinoline-2-thione **1a** (0.2 mmol, 50 mg), and  $\text{K}_2\text{CO}_3$  (20%, 6 mg) was dissolved in 1,4-dioxane (2 mL) and stirred at room temperature for 5 hours under air atmosphere. After the reaction completed (monitored by TLC analysis), saturated aq.  $\text{NH}_4\text{Cl}$  was added to the mixture to quench the reaction and extracted with ethyl acetate (3×25 mL). The combined organic layers were washed with aqueous  $\text{NaHCO}_3$  and brine, dried over  $\text{MgSO}_4$ , filtered, and the volatiles were removed in vacuum. The mixture was purified using silica gel column chromatography (ethyl acetate: petroleum ether = 1:30). The corresponding product **4a** was obtained as a white solid (80 mg, 80% yield)

#### 4. Typical Procedure for the Synthesis of 6

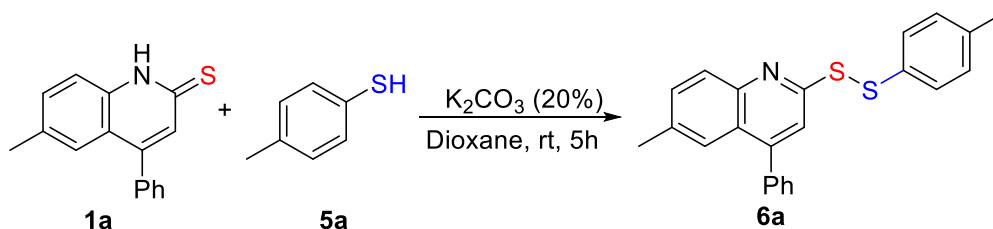

The mixture of quinoline-2-thione **1a** (0.2 mmol, 50 mg), thiophenol **5a** (0.3 mmol, 13 mg) and  $\text{K}_2\text{CO}_3$  (20%, 6 mg) in 1,4-dioxane (2 mL) was stirred at room temperature for 5 hours under air. After the completion of the reaction was monitored by TLC analysis, 2.0 mL saturated aq.  $\text{NH}_4\text{Cl}$  was added to the mixture to quench the reaction and extracted with ethyl acetate (3×25 mL). The combined organic layers were washed with aqueous  $\text{NaHCO}_3$  and brine, dried over  $\text{MgSO}_4$ , filtered, and the volatiles were removed in vacuum. The mixture was purified by using silica gel column chromatography (ethyl acetate: petroleum ether = 1:30). The corresponding product **6a** was obtained as a colourless oil (40 mg, 55% yield).

## 5. Spectroscopic Data of Compounds

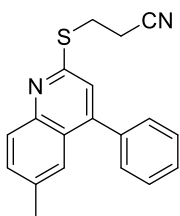

**3-((6-methyl-4-phenylquinolin-2-yl)thio)propanenitrile (3a).** White solid. mp: 114-116°C. <sup>1</sup>H NMR (400 MHz, CDCl<sub>3</sub>) δ = 7.89 (d, *J* = 8.4 Hz, 1H), 7.57–7.44 (m, 7H), 7.11 (s, 1H), 3.58 (t, *J* = 7.2 Hz, 2H), 3.01 (t, *J* = 7.2 Hz, 2H), 2.43 (s, 3H). <sup>13</sup>C NMR (100MHz, CDCl<sub>3</sub>) δ = 155.47, 148.13, 147.48, 137.83, 135.82, 132.09, 129.58, 128.81, 128.72, 128.40, 125.11, 121.03, 119.02, 25.71, 21.92, 18.78. HRMS (ESI) *m/z*: Calcd for C<sub>19</sub>H<sub>16</sub>N<sub>2</sub>S: 305.1107 [M+H]<sup>+</sup>, Found 305.1110.

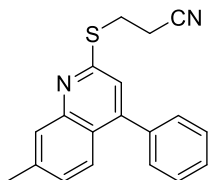

**3-((7-methyl-4-phenylquinolin-2-yl)thio)propanenitrile (3a).** White solid. mp: 136-137°C. <sup>1</sup>H NMR (600 MHz, CDCl<sub>3</sub>) δ = 7.79 (s, 1H), 7.69 (d, *J* = 8.4 Hz, 1H), 7.53 – 7.42 (m, 5H), 7.24 (dd, *J* = 9.0, 2.4 Hz, 1H), 7.09 (s, 1H), 3.58 (t, *J* = 7.2 Hz, 2H), 3.01 (t, *J* = 7.2 Hz, 2H), 2.55 (s, 3H). <sup>13</sup>C NMR (151 MHz, CDCl<sub>3</sub>) δ = 156.25, 148.86, 148.25, 140.15, 137.54, 129.32, 128.54, 128.50, 127.78, 127.65, 125.67, 122.87, 119.91, 118.73, 25.48, 21.62, 18.51. HRMS (ESI) *m/z*: Calcd for C<sub>19</sub>H<sub>16</sub>N<sub>2</sub>S: 305.1107 [M+H]<sup>+</sup>, Found 305.11101.

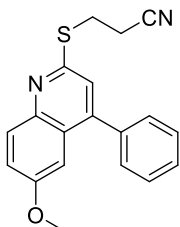

**3-((6-methoxy-4-phenylquinolin-2-yl)thio)propanenitrile (3c).** White solid. mp: 104-106°C. <sup>1</sup>H NMR (400 MHz, CDCl<sub>3</sub>) δ = 7.90 (d, *J* = 9.2 Hz, 1H), 7.55–7.45 (m, 5H), 7.33 (dd, *J* = 9.2, 2.8 Hz, 1H), 7.12 (s, 1H), 7.11 (s, 1H), 3.76 (s, 3H), 3.56 (t, *J* = 7.2 Hz, 2H), 2.99 (t, *J* = 7.2 Hz, 2H). <sup>13</sup>C NMR (150MHz, CDCl<sub>3</sub>) δ = 157.25, 153.50, 147.41, 144.74, 137.67, 129.85, 129.14, 128.67, 128.54, 125.74, 121.45, 121.09, 118.73, 104.60, 55.45, 25.51, 18.58. HRMS (ESI) *m/z*: Calcd for C<sub>19</sub>H<sub>16</sub>N<sub>2</sub>OS: 321.1056 [M+H]<sup>+</sup>, Found 321.1058.

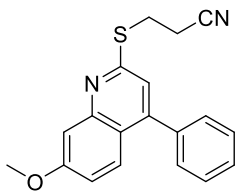

**3-((7-methoxy-4-phenylquinolin-2-yl)thio)propanenitrile (3d).** White solid. mp: 138-140°C. <sup>1</sup>H NMR (400 MHz, CDCl<sub>3</sub>) δ = 7.68 (d, *J* = 9.2 Hz, 1H), 7.53–7.41 (m, 5H), 7.33 (d, *J* = 2.8 Hz, 1H), 7.05 (dd, *J* = 9.2, 2.8 Hz, 1H), 7.03 (s, 1H), 3.98 (s, 3H), 3.59 (t, *J* = 7.2 Hz, 2H), 3.01 (t, *J* = 7.2 Hz, 2H). <sup>13</sup>C NMR (150 MHz, CDCl<sub>3</sub>) δ = 160.96, 156.65, 150.50, 148.33, 137.58, 129.28, 128.55, 128.52, 127.11, 119.77, 118.75, 118.60, 118.14, 107.08, 55.58, 25.42, 18.60. HRMS (ESI) *m/z*: Calcd for C<sub>19</sub>H<sub>16</sub>N<sub>2</sub>OS: 321.1056 [M+H]<sup>+</sup>, Found 321.1060.

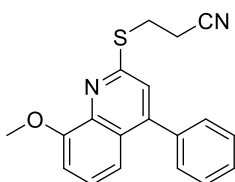

**3-((8-methoxy-4-phenylquinolin-2-yl)thio)propanenitrile (3e).** White solid. mp: 106-108°C. <sup>1</sup>H NMR (400 MHz, CDCl<sub>3</sub>) δ = 7.53–7.42 (m, 5H), 7.38–7.29 (m, 2H), 7.18 (s, 1H), 7.06 (dd, *J* = 7.6, 1.4 Hz, 1H), 4.06 (s, 3H), 3.60 (t, *J* = 6.8 Hz, 2H), 3.14 (t, *J* = 7.2 Hz, 2H). <sup>13</sup>C NMR (150 MHz, CDCl<sub>3</sub>) δ = 155.47, 154.80, 148.47, 140.46, 137.73, 129.34, 128.49, 125.97, 125.56, 121.18, 118.86, 117.81, 108.83, 56.26, 26.12, 18.10. HRMS (ESI) *m/z*: Calcd for C<sub>19</sub>H<sub>16</sub>N<sub>2</sub>OS: 321.1056 [M+H]<sup>+</sup>, Found 321.1059.

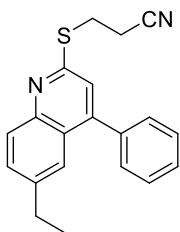

**3-((6-ethyl-4-phenylquinolin-2-yl)thio)propanenitrile (3f).** White solid. mp: 108-110°C. IR (KBr) 2972, 2900, 2162, 1581, 1543, 1047, 702 cm<sup>-1</sup>. <sup>1</sup>H NMR (400 MHz, CDCl<sub>3</sub>) δ = 7.92 (d, *J* = 8.4 Hz, 1H), 7.59 – 7.45 (m, 7H), 7.12 (s, 1H), 3.58 (t, *J* = 7.2 Hz, 2H), 3.01 (t, *J* = 7.2 Hz, 2H), 2.72 (q, *J* = 7.6 Hz, 2H), 1.23 (t, *J* = 7.6 Hz, 3H). <sup>13</sup>C NMR (150 MHz, CDCl<sub>3</sub>) δ = 155.28, 148.03, 147.45, 141.89, 137.61, 130.68, 129.34, 128.56, 128.47, 128.32, 124.87, 123.70, 120.77, 118.73, 28.98, 25.48, 18.53, 15.61. HRMS (ESI) *m/z*: Calcd for C<sub>20</sub>H<sub>18</sub>N<sub>2</sub>S: 319.1263 [M+H]<sup>+</sup>, Found 319.1266.

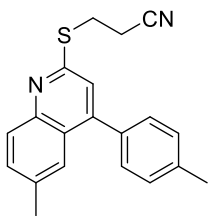

**3-((6-methyl-4-(p-tolyl)quinolin-2-yl)thio)propanenitrile (3g).** White solid. mp: 109-110°C. <sup>1</sup>H NMR (400 MHz, CDCl<sub>3</sub>) δ = 7.88 (d, *J* = 8.4 Hz, 1H), 7.58 (s, 1H), 7.50 (dd, *J* = 8.8, 2.0 Hz, 1H), 7.38–7.30 (m, 4H), 7.09 (s, 1H), 3.57 (t, *J* = 7.2 Hz, 2H), 3.00 (t, *J* = 7.2 Hz, 2H), 2.46 (s, 3H), 2.43 (s, 3H). <sup>13</sup>C NMR (150 MHz, CDCl<sub>3</sub>) δ = 155.21, 147.95, 147.26, 138.40, 135.45, 134.65, 131.75, 129.26, 129.25, 128.15, 124.97, 124.93, 120.71, 118.74, 25.48, 21.64, 21.29, 18.54. HRMS (ESI) *m/z*: Calcd for C<sub>20</sub>H<sub>18</sub>N<sub>2</sub>S: 319.1263 [M+H]<sup>+</sup>, Found 319.1267.

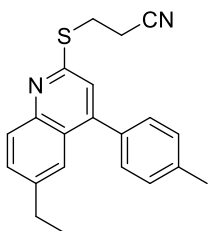

**3-((6-ethyl-4-(p-tolyl)quinolin-2-yl)thio)propanenitrile (3h).** White solid. mp: 89-91°C. <sup>1</sup>H NMR (400 MHz, CDCl<sub>3</sub>) δ = 7.91 (d, *J* = 8.4 Hz, 1H), 7.61 (s, 1H), 7.57–7.52 (m, 1H), 7.39–7.30 (m, 4H), 7.10 (s, 1H), 3.58 (t, *J* = 6.8 Hz, 2H), 3.00 (t, *J* = 6.8 Hz, 2H), 2.73 (q, *J* = 7.6 Hz, 2H), 2.46 (s, 3H), 1.24 (t, *J* = 8.4 Hz, 3H). <sup>13</sup>C NMR (150 MHz, CDCl<sub>3</sub>) δ = 155.25, 148.09, 147.47, 141.78, 138.41, 134.67, 130.60, 129.28, 129.26, 128.31, 124.98, 123.78, 120.71, 118.75, 28.99, 25.48, 21.30, 18.53, 15.65. HRMS (ESI) *m/z*: Calcd for C<sub>21</sub>H<sub>20</sub>N<sub>2</sub>S: 333.1420 [M+H]<sup>+</sup>, Found 333.1424.

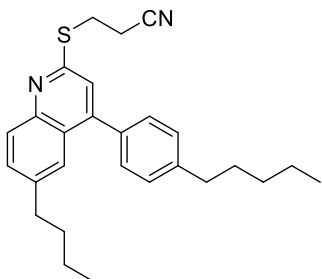

**3-((6-butyl-4-(4-pentylphenyl)quinolin-2-yl)thio)propanenitrile (3i).** Colourless oil. <sup>1</sup>H NMR (400 MHz, CDCl<sub>3</sub>) δ = 7.90 (d, *J* = 8.4 Hz, 1H), 7.61 (d, *J* = 2.0 Hz, 1H), 7.52 (dd, *J* = 8.4, 2.0 Hz, 1H), 7.41–7.30 (m, 4H), 7.11 (s, 1H), 3.57 (t, *J* = 6.8 Hz, 2H), 2.99 (t, *J* = 7.2 Hz, 2H), 2.69 (q, *J* = 7.6 Hz, 4H), 1.75–1.66 (m, 2H), 1.64–1.56 (m, 2H), 1.41–1.30 (m, 6H), 0.96–0.88 (m, 6H). <sup>13</sup>C NMR (150 MHz, CDCl<sub>3</sub>) δ = 155.24, 148.08, 147.48, 143.46, 140.42, 134.86, 131.00, 129.27, 128.61, 128.21, 124.90, 124.46, 120.74, 118.75, 35.74, 35.72, 33.58, 31.59, 31.07, 25.49, 22.56, 22.33, 18.54, 14.04, 13.90. HRMS (ESI) *m/z*: Calcd for C<sub>27</sub>H<sub>32</sub>N<sub>2</sub>S: 417.2359 [M+H]<sup>+</sup>, Found 417.2362.

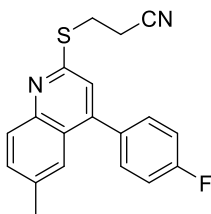

**3-((4-(4-fluorophenyl)-6-methylquinolin-2-yl)thio)propanenitrile (3j).** White solid. mp: 110-112°C. IR (KBr) 3047, 2248, 1602, 1544, 1510, 839 cm<sup>-1</sup>. <sup>1</sup>H NMR (400 MHz, CDCl<sub>3</sub>) δ = 7.89 (d, *J* = 8.4 Hz, 1H), 7.53–7.48 (m, 2H), 7.45–7.41 (m, 2H), 7.21 (t, *J* = 8.4 Hz, 2H), 7.08 (s, 1H), 3.57 (t, *J* = 7.2 Hz, 2H), 3.00 (t, *J* = 7.2 Hz, 2H), 2.44 (s, 3H). <sup>13</sup>C NMR (150 MHz, CDCl<sub>3</sub>) δ = 163.72, 162.08, 155.29, 147.02 (d, *J* = 64.5 Hz), 135.73, 133.52 (d, *J* = 3.3 Hz), 131.93, 131.05 (d, *J* = 8.1 Hz), 128.25, 124.82, 124.59, 120.82, 118.69, 115.66 (d, *J* = 21.3 Hz), 25.48, 21.67, 18.52. HRMS (ESI) *m/z*: Calcd for C<sub>19</sub>H<sub>15</sub>FN<sub>2</sub>S: 322.0940 [M+H]<sup>+</sup>, Found 322.0944.

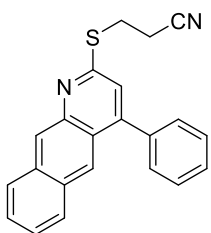

**3-((4-phenylbenzo[g]quinolin-2-yl)thio)propanenitrile(3k).** White solid. mp: 139-141°C. <sup>1</sup>H NMR (400 MHz, CDCl<sub>3</sub>) δ = 7.98–7.87 (m, 2H), 7.84 (d, *J* = 8.8 Hz, 1H), 7.57 (d, *J* = 8.8 Hz, 1H), 7.50–7.42 (m, 3H), 7.38–7.34 (m, 2H), 7.18 (s, 1H), 7.13 (t, *J* = 7.2 Hz, 1H), 3.60 (t, *J* = 7.2 Hz, 2H), 3.02 (t, *J* = 7.2 Hz, 2H). <sup>13</sup>C NMR (150 MHz, CDCl<sub>3</sub>) δ = 155.09, 149.71, 148.70, 142.03, 132.48, 131.82, 129.79, 129.20, 128.65, 128.30, 128.19, 127.82, 127.68, 126.20, 125.68, 123.31, 121.39, 118.68, 25.53, 18.66. HRMS (ESI) *m/z*: Calcd for C<sub>22</sub>H<sub>16</sub>N<sub>2</sub>S: 341.1107 [M+H]<sup>+</sup>, Found 341.1111.

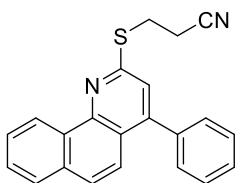

**3-((4-phenylbenzo[h]quinolin-2-yl)thio)propanenitrile(3l).** White solid. mp: 94-97°C. <sup>1</sup>H NMR (400 MHz, CDCl<sub>3</sub>) δ = 9.21 (d, *J* = 8.0 Hz, 1H), 7.89 (dd, *J* = 7.6, 1.6 Hz, 1H), 7.77–7.68 (m, 4H), 7.57–7.45 (m, 5H), 7.32 (s, 1H), 3.76 (t, *J* = 7.1 Hz, 2H), 3.13 (t, *J* = 7.1 Hz, 2H). <sup>13</sup>C NMR (150 MHz, CDCl<sub>3</sub>) δ = 154.92, 148.84, 146.64, 137.72, 133.69, 130.81, 129.46, 128.60, 128.53, 128.39, 127.75, 127.08, 126.48, 124.29, 122.97, 122.18, 121.30, 118.63, 25.82, 18.39. HRMS (ESI) *m/z*: Calcd for C<sub>22</sub>H<sub>16</sub>N<sub>2</sub>S: 341.1107 [M+H]<sup>+</sup>, Found 341.1110.

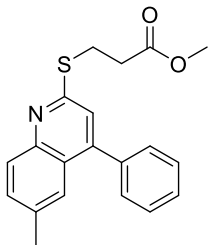

**methyl 3-((6-methyl-4-phenylquinolin-2-yl)thio)propanoate(3m).** White solid mp: 58-60°C.  $^1\text{H}$  NMR (400 MHz,  $\text{CDCl}_3$ )  $\delta$  = 7.89 (d,  $J$  = 8.0 Hz, 1H), 7.54–7.42 (m, 7H), 7.09 (s, 1H), 3.72 (s, 3H), 3.61 (t,  $J$  = 7.2 Hz, 2H), 2.93 (t,  $J$  = 7.2 Hz, 2H), 2.42 (s, 3H).  $^{13}\text{C}$  NMR (101 MHz,  $\text{CDCl}_3$ )  $\delta$  = 173.03, 156.91, 147.57, 138.07, 135.36, 131.79, 129.61, 128.75, 128.56, 128.47, 124.99, 124.93, 121.15, 52.01, 34.72, 24.95, 21.89. HRMS (ESI)  $m/z$ : Calcd for  $\text{C}_{20}\text{H}_{19}\text{NO}_2\text{S}$ : 338.1209  $[\text{M}+\text{H}]^+$ , Found 338.1211.

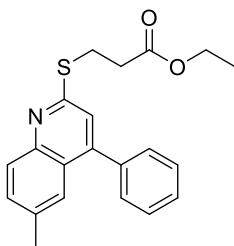

**ethyl 3-((6-methyl-4-phenylnaphthalen-2-yl)thio)propanoate(3n).** White solid. mp: 80-82°C.  $^1\text{H}$  NMR (400 MHz,  $\text{CDCl}_3$ )  $\delta$  = 7.89 (d,  $J$  = 8.4 Hz, 1H), 7.55–7.44 (m, 7H), 7.10 (s, 1H), 4.19 (q,  $J$  = 6.8 Hz, 2H), 3.60 (t,  $J$  = 6.8 Hz, 2H), 2.90 (t,  $J$  = 7.2 Hz, 2H), 2.42 (s, 3H), 1.27 (t,  $J$  = 7.2 Hz, 3H).  $^{13}\text{C}$  NMR (150 MHz,  $\text{CDCl}_3$ )  $\delta$  = 172.29, 156.77, 147.33, 137.86, 135.08, 131.52, 129.36, 128.48, 128.30, 128.23, 124.73, 124.69, 120.91, 60.58, 34.71, 24.74, 21.62, 14.22. HRMS (ESI)  $m/z$ : Calcd for  $\text{C}_{21}\text{H}_{21}\text{O}_2\text{S}$ : 352.1366  $[\text{M}+\text{H}]^+$ , Found 352.1368.

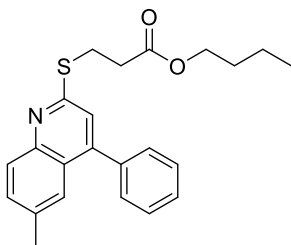

**butyl 3-((6-methyl-4-phenylnaphthalen-2-yl)thio)propanoate(3o).** Colourless Oil.  $^1\text{H}$  NMR (400 MHz,  $\text{CDCl}_3$ )  $\delta$  = 7.89 (d,  $J$  = 8.4 Hz, 1H), 7.55–7.44 (m, 7H), 7.10 (s, 1H), 4.13 (t,  $J$  = 6.4 Hz, 2H), 3.61 (t,  $J$  = 6.8 Hz, 2H), 2.90 (t,  $J$  = 7.2 Hz, 2H), 2.42 (s, 3H), 1.63–1.58 (m, 2H), 1.44–1.33 (m, 2H), 0.93 (t,  $J$  = 7.2 Hz, 3H).  $^{13}\text{C}$  NMR (150 MHz,  $\text{CDCl}_3$ )  $\delta$  = 172.37, 156.76, 147.32, 147.31, 137.86, 135.08, 131.51, 129.36, 128.48, 128.29, 128.22, 124.73, 124.69, 120.92, 64.51, 34.73, 30.64, 24.77, 21.62, 19.13, 13.68. HRMS (ESI)  $m/z$ : Calcd for  $\text{C}_{23}\text{H}_{25}\text{NO}_2\text{S}$ : 380.1679  $[\text{M}+\text{H}]^+$ , Found 380.1680.



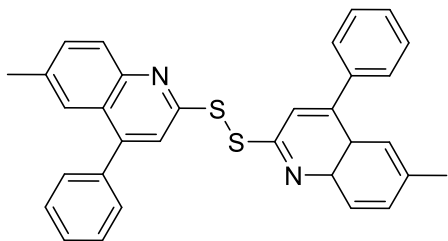

**1,2-bis(6-methyl-4-phenylquinolin-2-yl)disulfane (4a).** White solid. mp: 199-201°C. IR (KBr) 2924, 2850, 1577, 1546, 1323, 819  $\text{cm}^{-1}$ .  $^1\text{H}$  NMR (600 MHz,  $\text{CDCl}_3$ )  $\delta$ : 7.94 (d,  $J = 8.8\text{Hz}$ , 1H), 7.75 (s, 1H), 7.57 (s, 1H), 7.52 (d,  $J = 8.4\text{ Hz}$ , 1H), 7.46 (m, 3H), 7.42 – 7.38 (m, 2H), 2.42 (s, 3H).  $^{13}\text{C}$  NMR (150 MHz,  $\text{CDCl}_3$ )  $\delta$ : 157.75, 149.28, 147.07, 137.68, 136.33, 132.28, 129.46, 128.51 (d,  $J = 6.5\text{ Hz}$ ), 125.13, 124.72, 117.43, 21.74. HRMS (ESI<sup>+</sup>)  $m/z$ : Calcd for  $\text{C}_{32}\text{H}_{24}\text{N}_2\text{S}_2$  501.1454 [M+H]<sup>+</sup>, Found 501.1458.

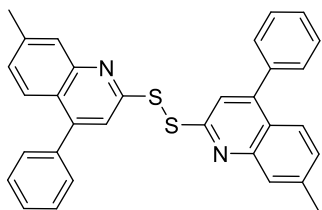

**1,2-bis(7-methyl-4-phenylquinolin-2-yl)disulfane(4b).** White solid. mp : 144-146°C.  $^1\text{H}$  NMR (400 MHz,  $\text{CDCl}_3$ )  $\delta$  = 7.85–7.80 (m, 1H), 7.74–7.69 (m, 2H), 7.47–7.38 (m, 5H), 7.27–7.24 (m, 1H), 2.53 (s, 3H).  $^{13}\text{C}$  NMR (151 MHz,  $\text{CDCl}_3$ )  $\delta$  = 158.73, 149.66, 148.71, 140.54, 137.63, 129.45, 128.52, 128.50, 127.87, 125.60, 123.16, 116.48, 21.68. HRMS (ESI<sup>+</sup>)  $m/z$ : Calcd for  $\text{C}_{32}\text{H}_{24}\text{N}_2\text{S}_2$  501.1454 [M+H]<sup>+</sup>, Found 501.1456

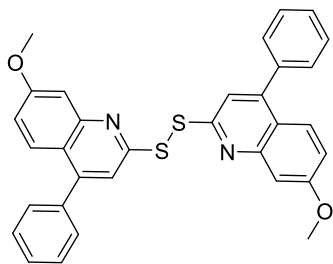

**1,2-bis(6-methoxy-4-phenylquinolin-2-yl)disulfane(4c).** White solid. mp: 148-150°C.  $^1\text{H}$  NMR (400 MHz,  $\text{CDCl}_3$ )  $\delta$  = 7.70 (d,  $J = 9.2\text{ Hz}$ , 1H), 7.65 (s, 1H), 7.46–7.36 (m, 6H), 7.07 (dd,  $J = 9.2, 2.4\text{ Hz}$ , 1H), 3.93 (s, 3H).  $^{13}\text{C}$  NMR (151 MHz,  $\text{CDCl}_3$ )  $\delta$  = 161.18, 159.16, 150.33, 149.77, 137.65, 129.41, 128.51, 127.04, 120.16, 119.23, 115.09, 106.91, 55.58. HRMS (ESI<sup>+</sup>)  $m/z$ : Calcd for  $\text{C}_{32}\text{H}_{24}\text{N}_2\text{O}_2\text{S}_2$  533.1352 [M+H]<sup>+</sup>, Found 533.1355.

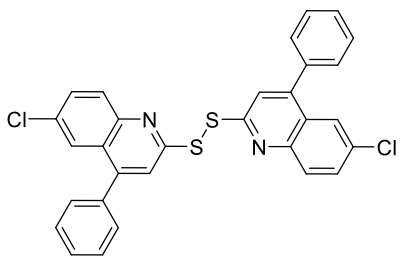

**1,2-bis(6-chloro-4-phenylquinolin-2-yl)disulfane (4d).** White solid. mp: 200-203°C. <sup>1</sup>H NMR (400 MHz, CDCl<sub>3</sub>) δ = 7.96 (d, *J* = 8.8 Hz, 1H), 7.78 (d, *J* = 2.4 Hz, 1H), 7.76 (s, 1H), 7.62 (dd, *J* = 8.8, 1.6 Hz, 1H), 7.52–7.45 (m, 3H), 7.41–7.36 (m, 2H). <sup>13</sup>C NMR (100 MHz, CDCl<sub>3</sub>) δ = 159.18, 149.38, 147.10, 137.00, 132.56, 131.29, 130.57, 129.59, 129.21, 129.05, 126.21, 125.06, 118.41. HRMS (ESI) *m/z*: Calcd for C<sub>30</sub>H<sub>18</sub>Cl<sub>2</sub>N<sub>2</sub>S<sub>2</sub>: 541.0361 [M+H]<sup>+</sup>, Found 541.0365.

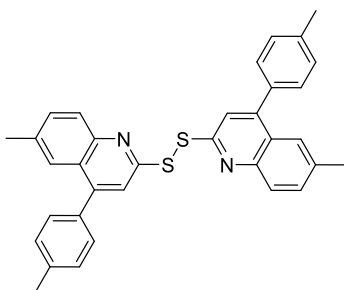

**1,2-bis(6-methyl-4-(p-tolyl)quinolin-2-yl)disulfane (4e).** White solid. mp: 178-180°C. <sup>1</sup>H NMR (400 MHz, CDCl<sub>3</sub>) δ = 7.93 (d, *J* = 8.4 Hz, 1H), 7.72 (s, 1H), 7.60 (s, 1H), 7.51 (dd, *J* = 8.8, 2.0 Hz, 1H), 7.31–7.24 (m, 4H), 2.42 (s, 6H). <sup>13</sup>C NMR (150 MHz, CDCl<sub>3</sub>) δ = 157.76, 149.33, 147.08, 138.44, 136.17, 134.76, 132.18, 129.38, 129.23, 128.46, 125.22, 124.79, 117.32, 21.73, 21.27. HRMS (ESI) *m/z*: Calcd for C<sub>34</sub>H<sub>28</sub>N<sub>2</sub>S<sub>2</sub>: 529.1767 [M+H]<sup>+</sup>, Found 529.1770.

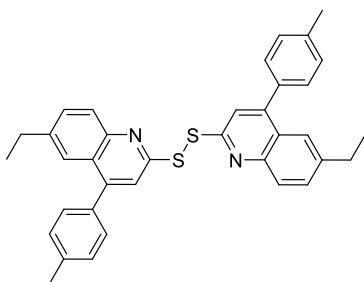

**1,2-bis(6-ethyl-4-(p-tolyl)quinolin-2-yl)disulfane (4f).** White solid. mp: 150-152°C. <sup>1</sup>H NMR (400 MHz, CDCl<sub>3</sub>) δ = 7.96 (d, *J* = 8.4 Hz, 1H), 7.73 (d, *J* = 0.8 Hz, 1H), 7.62 (s, 1H), 7.56 (dd, *J* = 8.8, 2.0 Hz, 1H), 7.33–7.26 (m, 4H), 2.72 (q, *J* = 7.6 Hz, 2H), 2.42 (s, 3H), 1.22 (t, *J* = 7.2 Hz, 3H). <sup>13</sup>C NMR (150 MHz, CDCl<sub>3</sub>) δ = 157.82, 149.48, 147.27, 142.44, 138.43, 134.77, 131.04, 129.39, 129.23, 128.60, 125.23, 123.63, 117.27, 29.04, 21.26, 15.54. HRMS (ESI) *m/z*: Calcd for C<sub>36</sub>H<sub>32</sub>N<sub>2</sub>S<sub>2</sub>: 557.2080 [M+H]<sup>+</sup>, Found 557.2084.

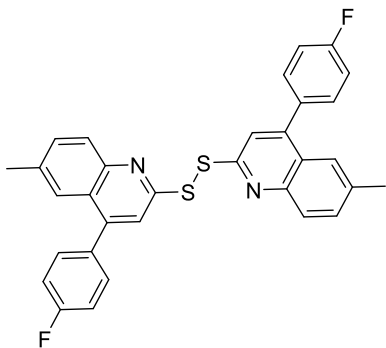

**1,2-bis(4-(4-fluorophenyl)-6-methylquinolin-2-yl)disulfane (4g).** White solid. mp: 197-200°C.  $^1\text{H}$  NMR (400 MHz,  $\text{CDCl}_3$ )  $\delta$  = 7.93 (d,  $J$  = 8.0 Hz, 1H), 7.72 (s, 1H), 7.54 (d,  $J$  = 2.0 Hz, 1H), 7.52 (s, 1H), 7.40–7.35 (m, 2H), 7.16 (t,  $J$  = 8.8 Hz, 2H), 2.44 (s, 3H).  $^{13}\text{C}$  NMR (151 MHz,  $\text{CDCl}_3$ )  $\delta$  = 163.74, 162.09, 157.71, 148.21, 147.0, 136.56, 133.56(d,  $J$  = 13.8 Hz), 132.40, 131.16(d,  $J$  = 34.2 Hz), 128.54, 125.10, 124.46, 117.50, 115.65(d,  $J$  = 85.2 Hz), 21.75. HRMS (ESI)  $m/z$ : Calcd for  $\text{C}_{32}\text{H}_{22}\text{F}_2\text{N}_2\text{S}_2$ : 537.1265  $[\text{M}+\text{H}]^+$ , Found 537.1269.

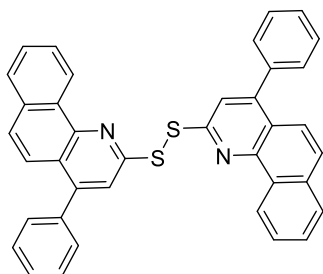

**1,2-bis(4-phenylbenzo[h]quinolin-2-yl)disulfane (4h).** White solid. mp: 190-192°C.  $^1\text{H}$  NMR (400 MHz,  $\text{CDCl}_3$ )  $\delta$  = 9.24 (d,  $J$  = 6.8 Hz, 1H), 7.90 (s, 1H), 7.85 (d,  $J$  = 7.6 Hz, 1H), 7.70 (d,  $J$  = 2.8 Hz, 2H), 7.68–7.63 (m, 1H), 7.60–7.55 (m, 1H), 7.44 (s, 4H).  $^{13}\text{C}$  NMR (151 MHz,  $\text{CDCl}_3$ )  $\delta$  = 157.36, 149.56, 146.88, 137.95, 133.59, 130.89, 129.57, 128.52, 128.47, 128.41, 127.39, 127.15, 127.02, 125.20, 122.75, 122.70, 118.71. HRMS (ESI)  $m/z$ : Calcd for  $\text{C}_{38}\text{H}_{24}\text{N}_2\text{S}_2$ : 573.1454  $[\text{M}+\text{H}]^+$ , Found 573.1458.

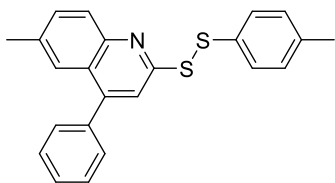

**6-methyl-4-phenyl-2-(p-tolyldisulfanyl)quinoline. (6a).** Colourless Oil.  $^1\text{H}$  NMR (400 MHz,  $\text{CDCl}_3$ )  $\delta$  = 7.96 (d,  $J$  = 8.8 Hz, 1H), 7.73 (s, 1H), 7.58 (s, 1H), 7.56–7.43 (m, 8H), 7.09 (d,  $J$  = 7.2 Hz, 2H), 2.44 (s, 3H), 2.30 (s, 3H).  $^{13}\text{C}$  NMR (151 MHz,  $\text{CDCl}_3$ )  $\delta$  = 158.50, 148.95, 147.15, 137.87, 137.76, 136.13, 133.12, 132.18, 130.85, 129.85, 129.46, 128.72, 128.56, 128.48, 124.70, 117.32, 21.73, 21.03. HRMS (ESI)  $m/z$ : Calcd for  $\text{C}_{23}\text{H}_{19}\text{NS}_2$ : 374.1032  $[\text{M}+\text{H}]^+$ , Found 374.1035.

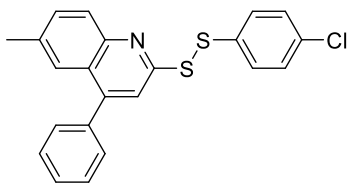

**2-((4-chlorophenyl)disulfanyl)-6-methyl-4-phenylquinoline (6b).** White solid. mp: 173-175°C.  $^1\text{H}$  NMR (400 MHz,  $\text{CDCl}_3$ )  $\delta$  = 7.96 (d,  $J$  = 8.4 Hz, 1H), 7.62 (s, 1H), 7.58 (s, 1H), 7.56–7.49 (m, 6H), 7.46–7.43 (m, 2H), 7.26 (s, 1H), 7.24–7.23 (m, 1H), 2.44 (s, 3H).  $^{13}\text{C}$  NMR (151 MHz,  $\text{CDCl}_3$ )  $\delta$  = 157.48, 149.19, 147.19, 137.73, 136.38, 135.17, 133.50, 132.34, 129.42, 129.38, 129.20, 128.61, 128.57, 128.49, 125.14, 124.74, 117.26, 21.74. HRMS (ESI)  $m/z$ : Calcd for  $\text{C}_{22}\text{H}_{16}\text{ClNS}_2$ : 394.0485  $[\text{M}+\text{H}]^+$ , Found 394.0489.

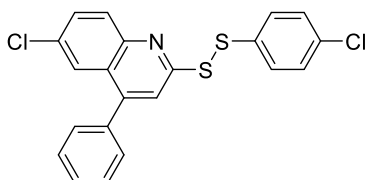

**6-chloro-2-((4-chlorophenyl)disulfanyl)-4-phenylquinoline (6c)** Colourless Oil.  $^1\text{H}$  NMR (400 MHz,  $\text{CDCl}_3$ )  $\delta$  = 8.00 (d,  $J$  = 8.8 Hz, 1H), 7.80 (d,  $J$  = 2.4 Hz, 1H), 7.68 (s, 1H), 7.64 (dd,  $J$  = 9.2, 2.4 Hz, 1H), 7.57 – 7.49 (m, 6H), 7.45 – 7.41 (m, 2H), 7.28 (s, 1H), 7.26 (s, 1H).  $^{13}\text{C}$  NMR (151 MHz,  $\text{CDCl}_3$ )  $\delta$  = 159.16, 149.01, 146.98, 136.85, 134.82, 133.75, 132.26, 131.03, 130.33, 129.55, 129.31, 129.28, 128.99, 128.85, 125.94, 124.82, 117.98. HRMS (ESI)  $m/z$ : Calcd for  $\text{C}_{21}\text{H}_{13}\text{Cl}_2\text{NS}_2$ : 413.9939  $[\text{M}+\text{H}]^+$ , Found 413.9942.

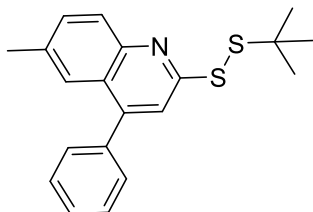

**2-(tert-butylidisulfanyl)-6-methyl-4-phenylquinoline (6d)** White solid. mp: 83-85°C.  $^1\text{H}$  NMR (600 MHz,  $\text{CDCl}_3$ )  $\delta$  = 7.95 (d,  $J$  = 9.0 Hz, 1H), 7.84 (s, 1H), 7.58 – 7.50 (m, 5H), 7.50 – 7.47 (m, 2H), 2.44 (s, 3H), 1.36 (s, 9H).  $^{13}\text{C}$  NMR (150 MHz,  $\text{CDCl}_3$ )  $\delta$  = 160.31, 148.47, 146.91, 138.07, 135.91, 132.07, 129.42, 128.58, 128.42, 128.37, 124.86, 124.70, 117.34, 49.25, 29.80, 21.70. HRMS (ESI)  $m/z$ : Calcd for  $\text{C}_{20}\text{H}_{21}\text{NS}_2$ : 340.1188  $[\text{M}+\text{H}]^+$ , Found 340.1193.

## 6. Copies of $^1\text{H}$ NMR and $^{13}\text{C}$ NMR Spectra for Compounds

### $^1\text{H}$ and $^{13}\text{C}$ Spectra of compound 3a ( $\text{CDCl}_3$ )

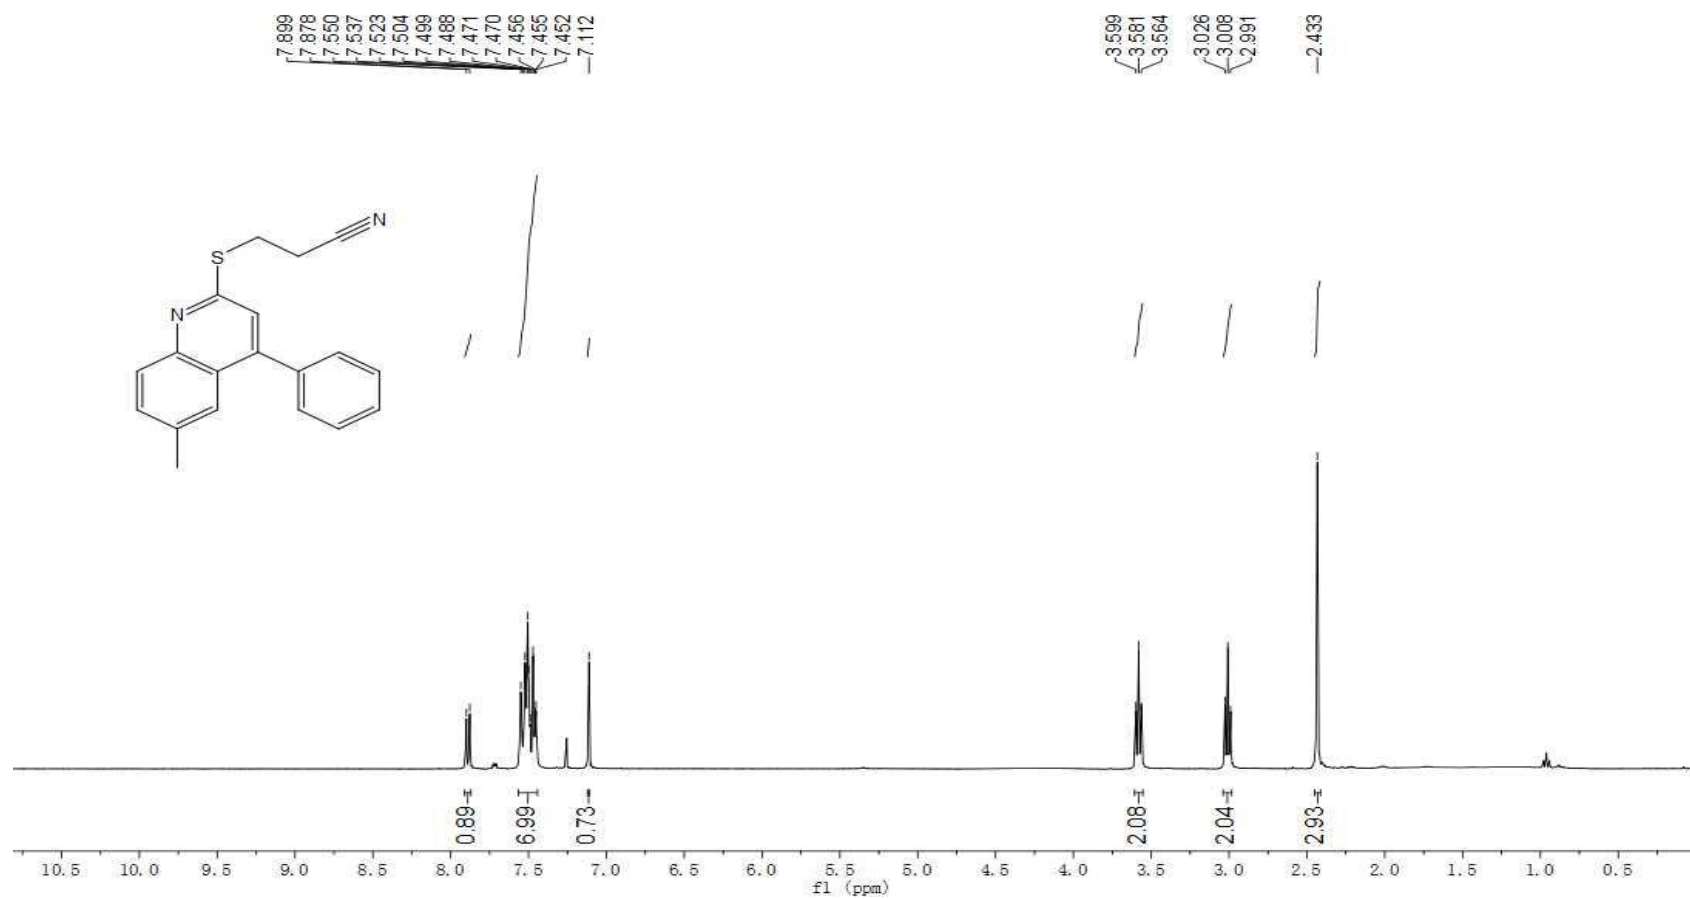

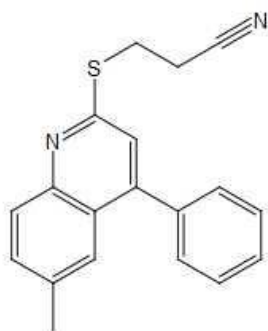

155.474  
148.134  
147.475  
137.830  
135.818  
132.086  
129.582  
128.812  
128.720  
128.403  
125.105  
121.025  
119.020

25.715  
21.917  
18.777

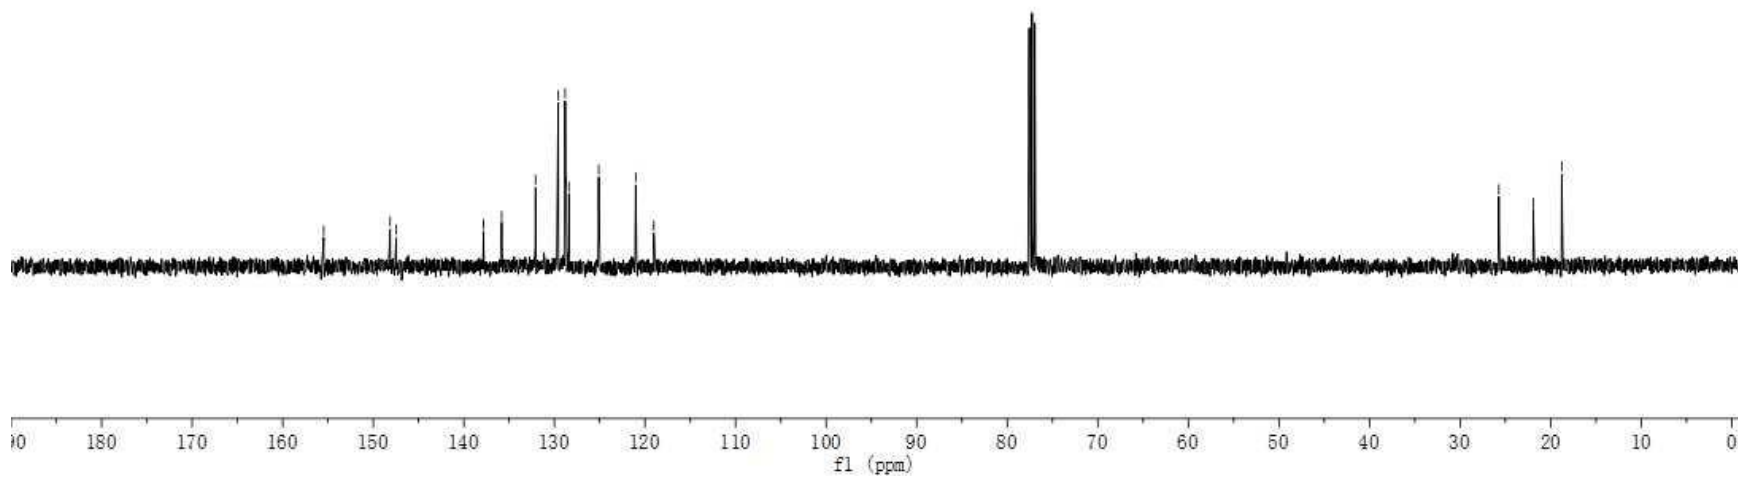

# <sup>1</sup>H and <sup>13</sup>C Spectra of compound 3b (CDCl<sub>3</sub>)

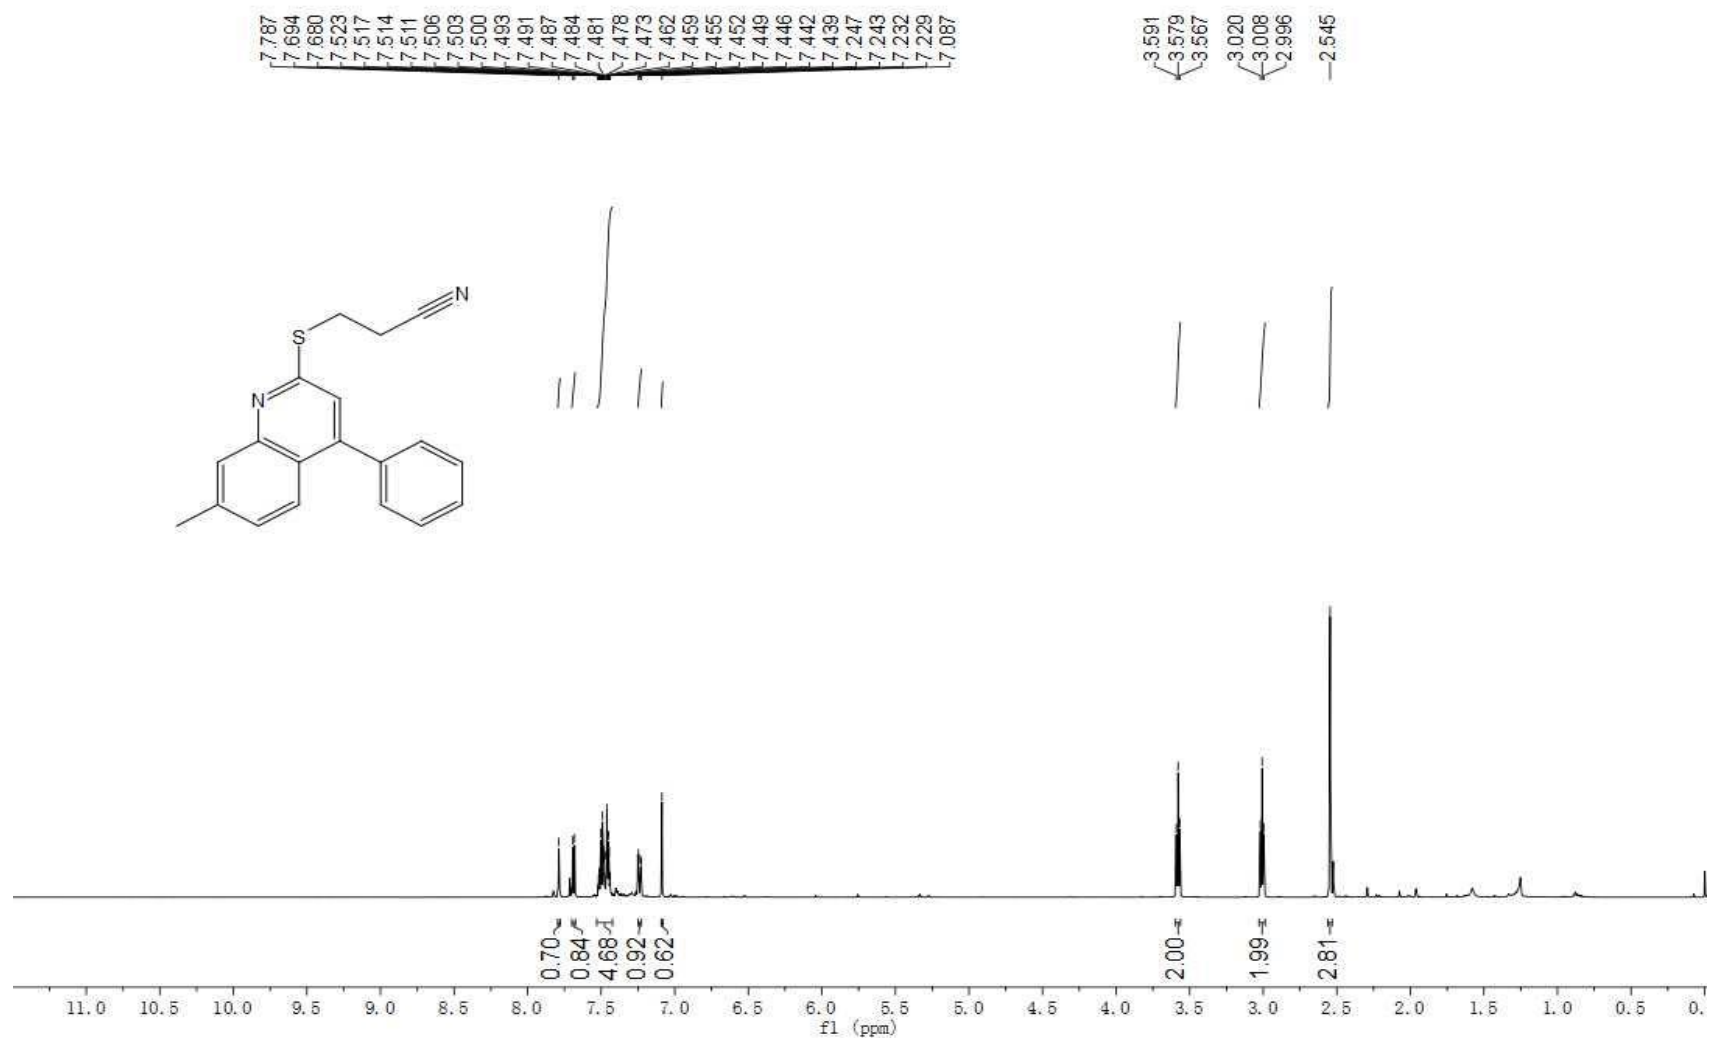

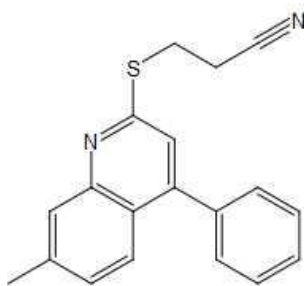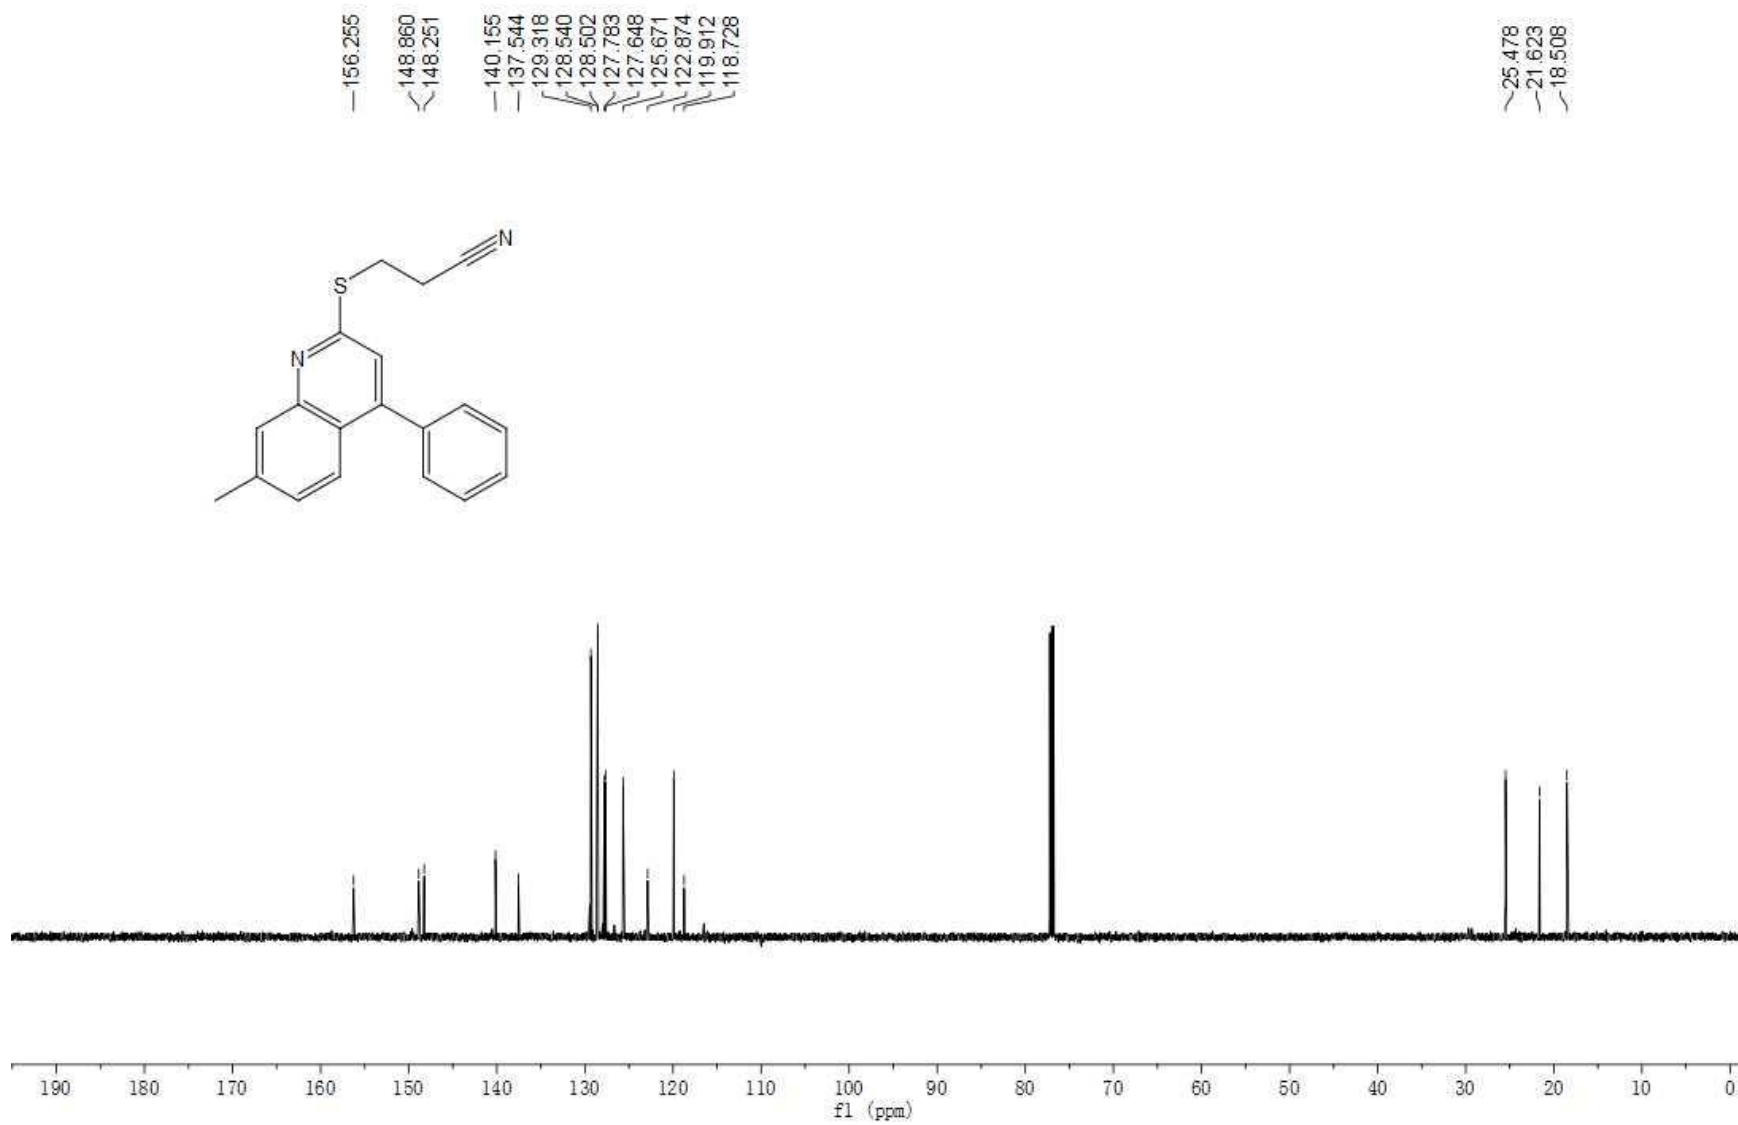



**<sup>1</sup>H and <sup>13</sup>C Spectra of compound 3c (CDCl<sub>3</sub>)**

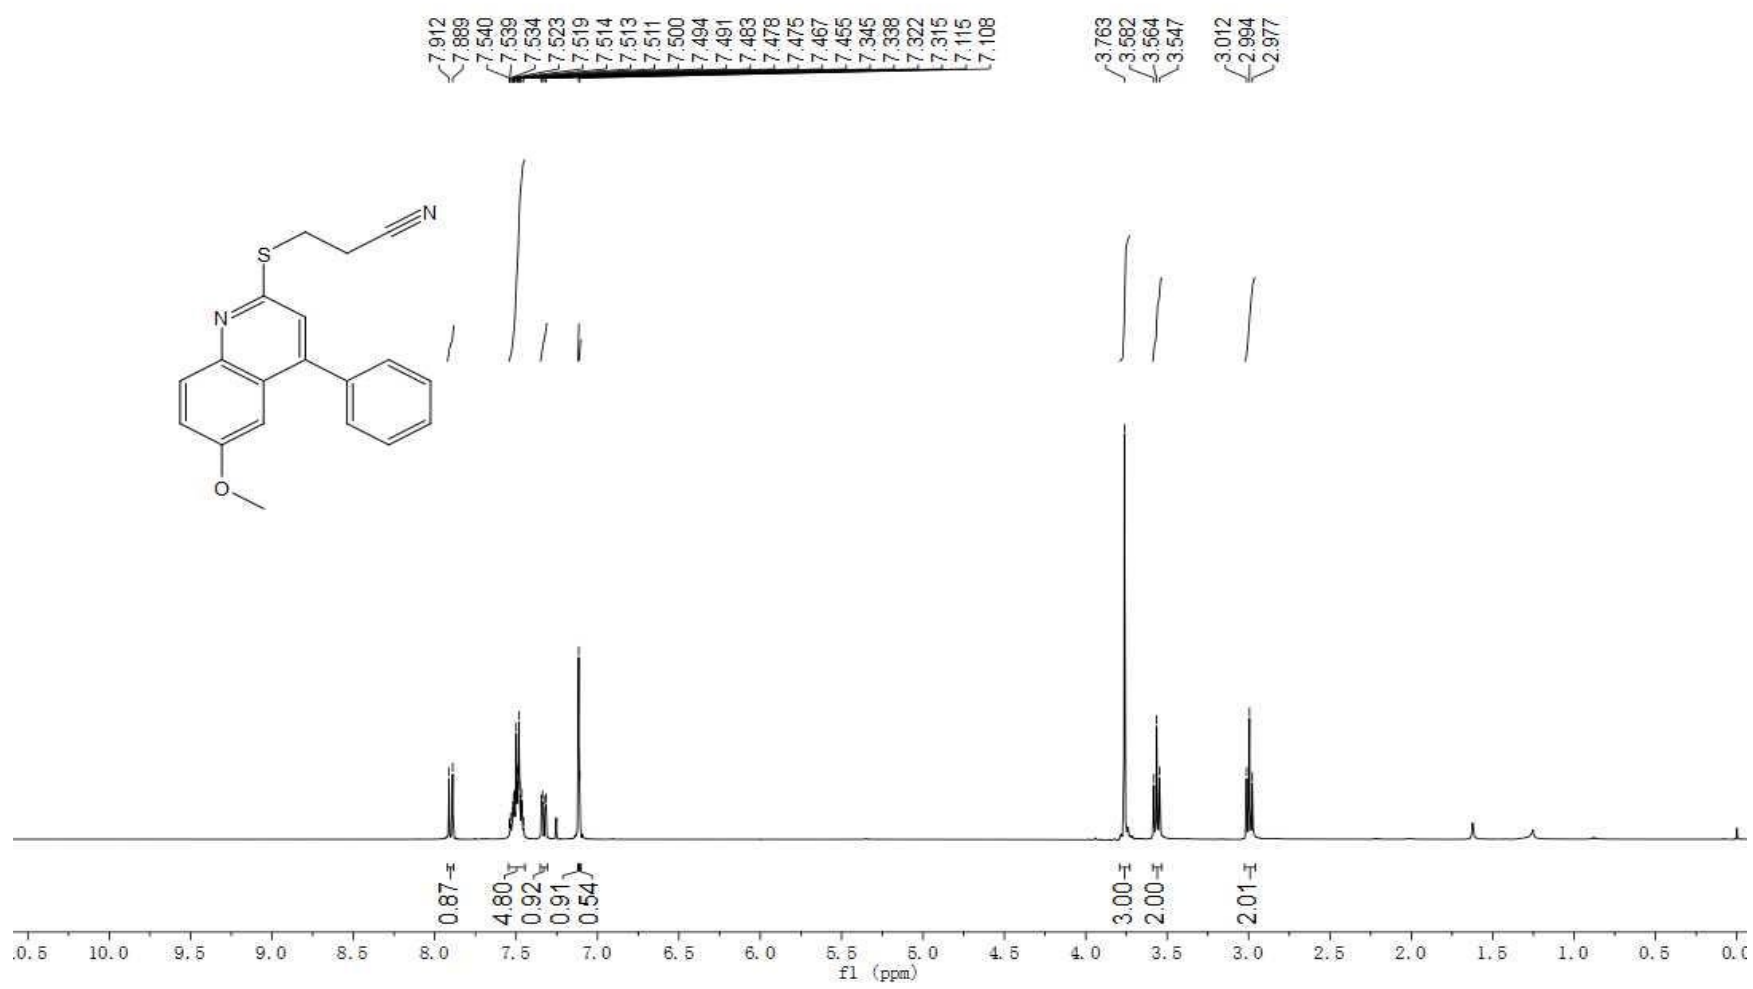

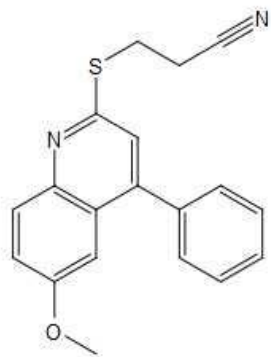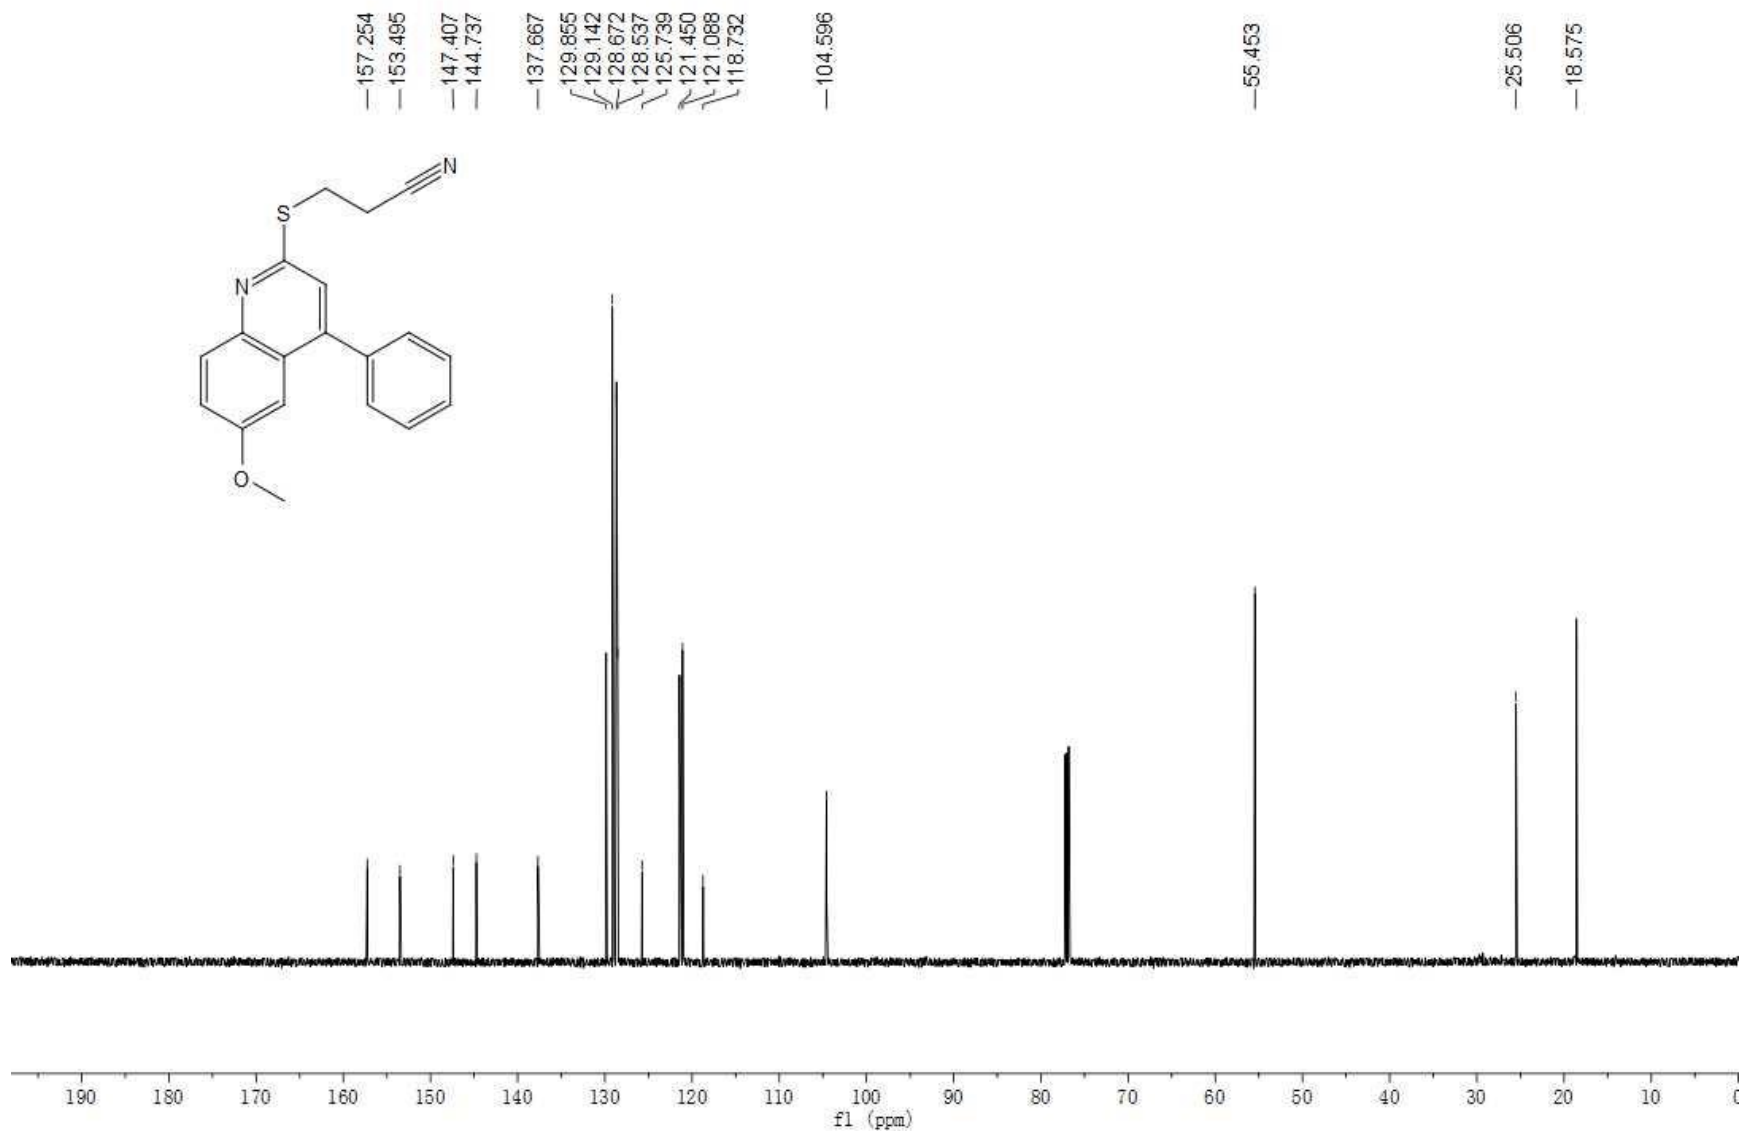

**<sup>1</sup>H and <sup>13</sup>C Spectra of compound 3d (CDCl<sub>3</sub>)**

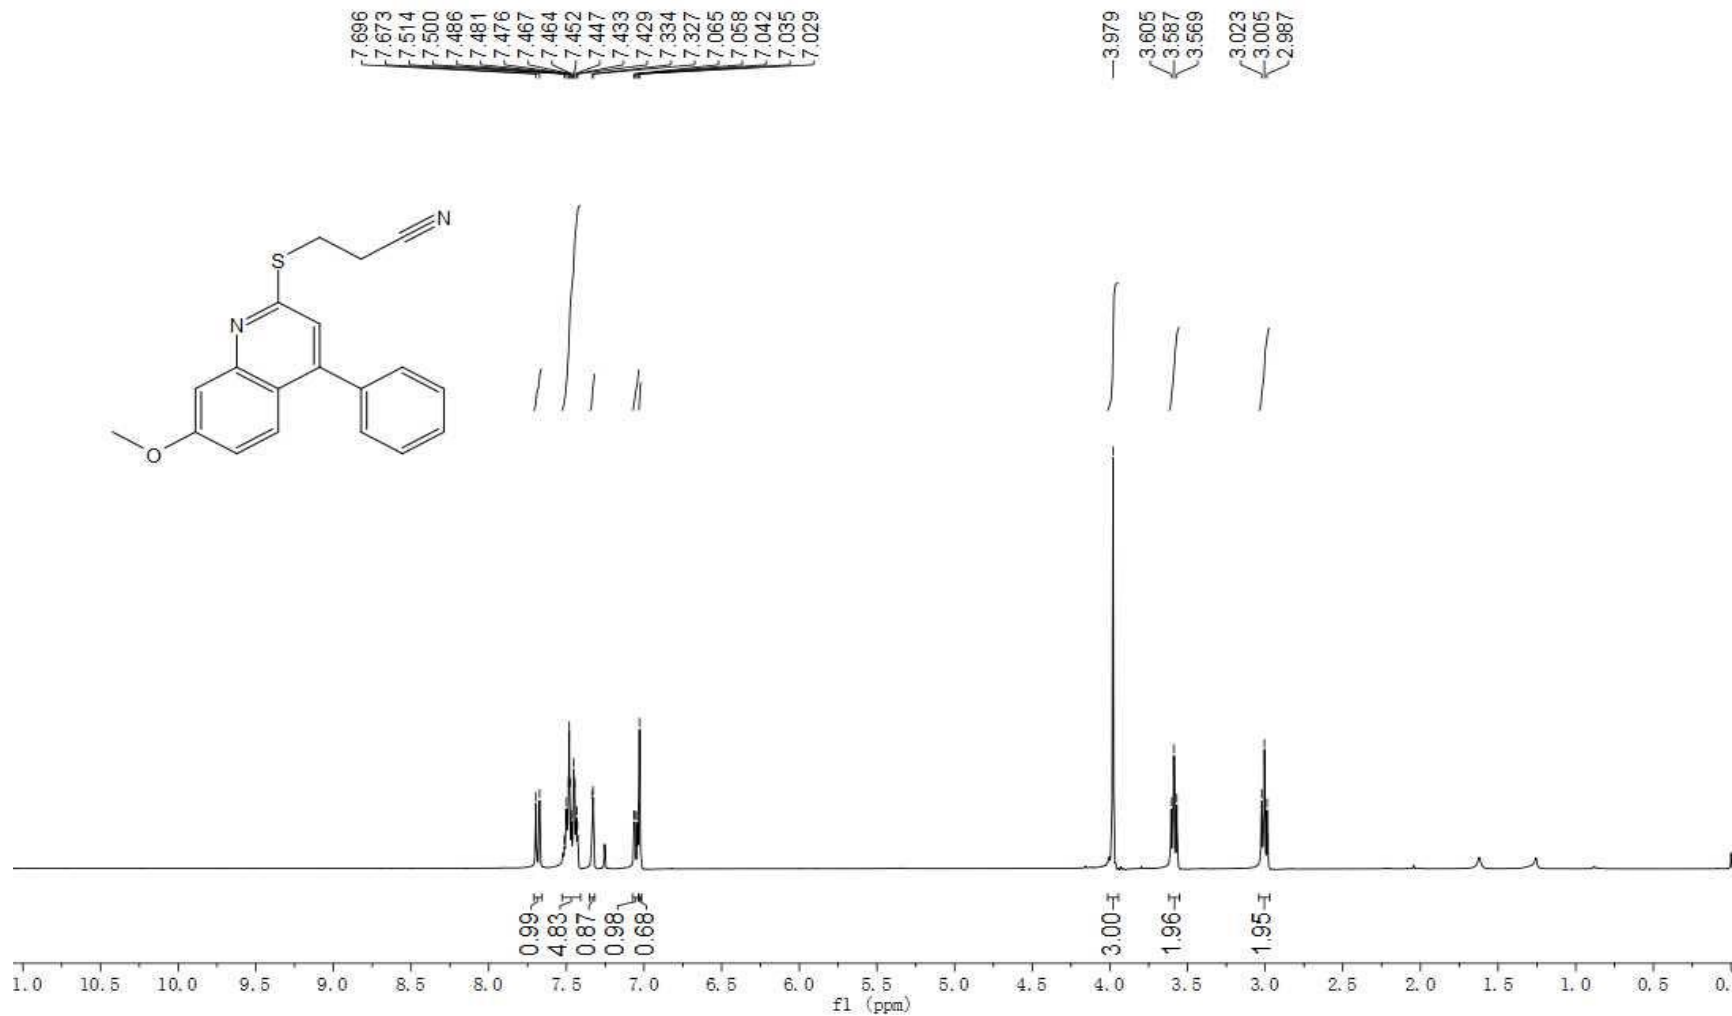

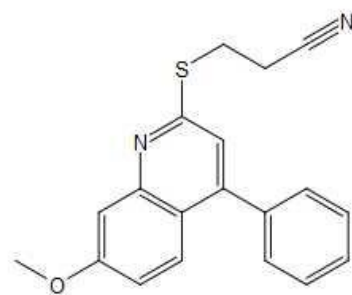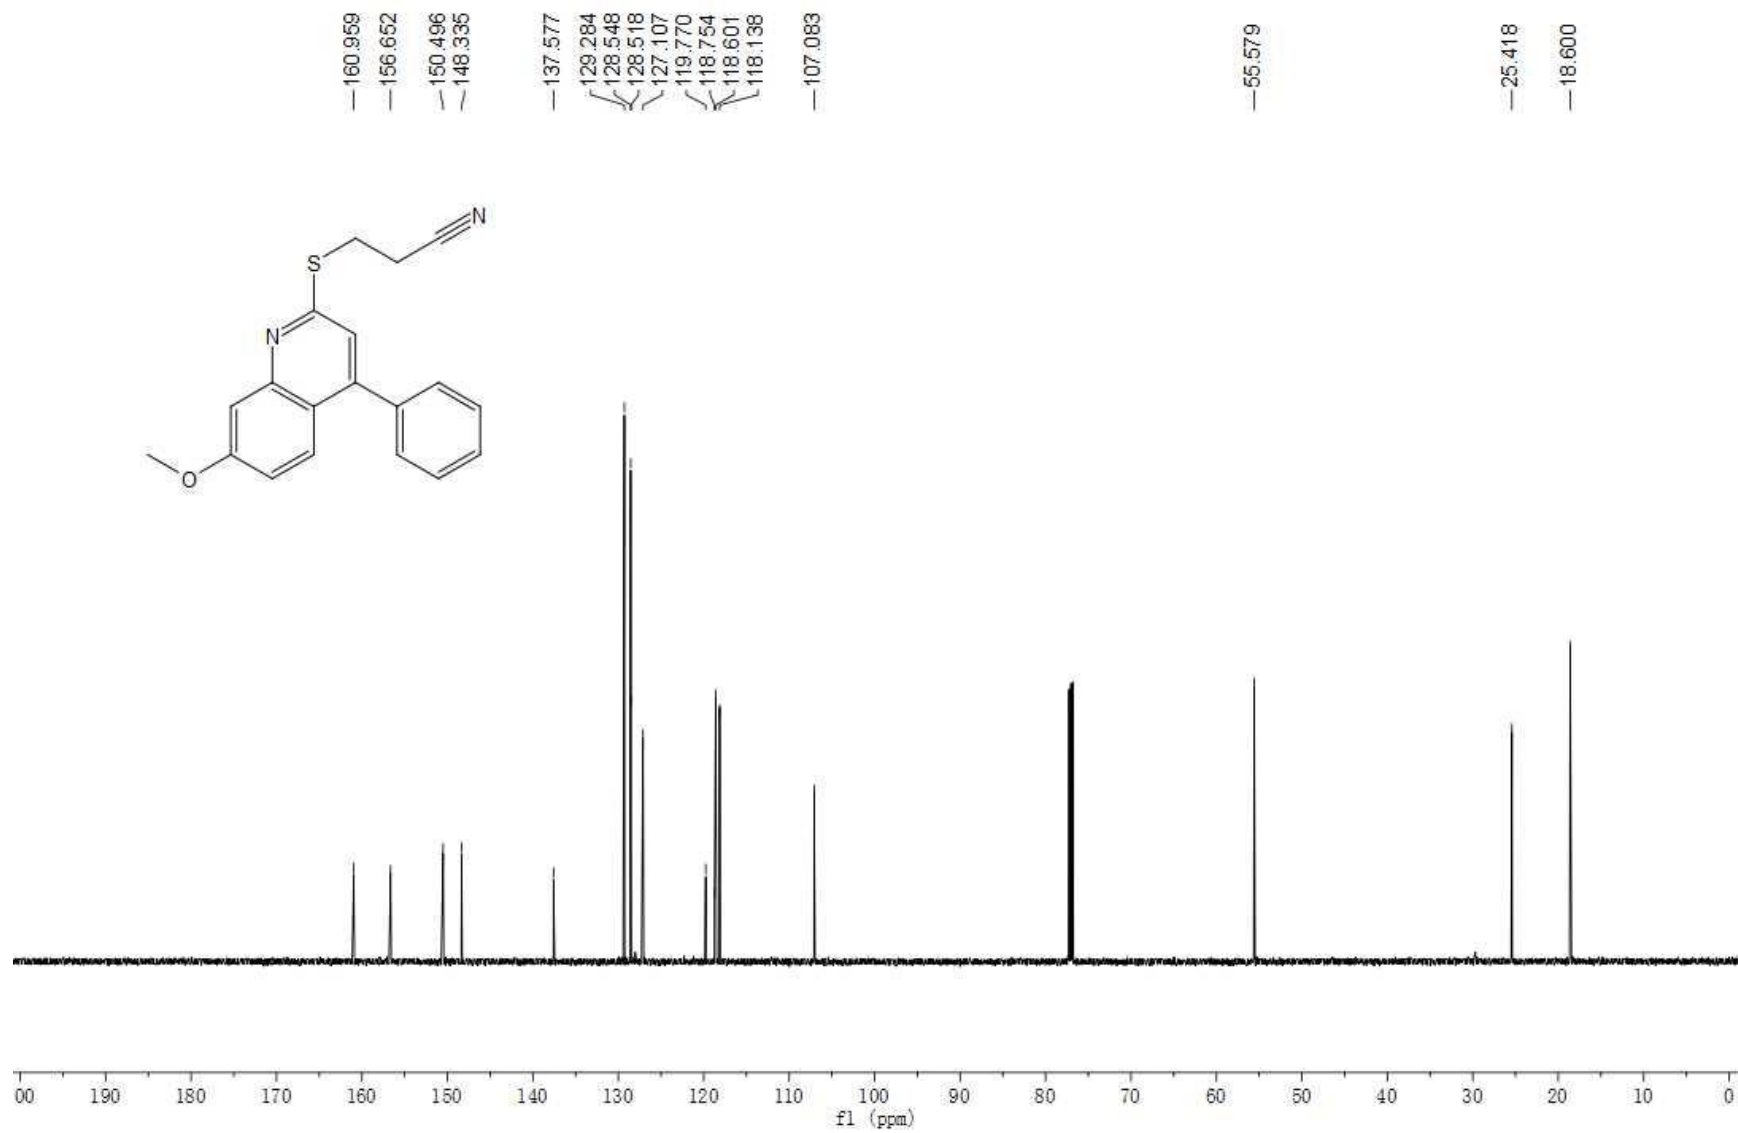

**<sup>1</sup>H and <sup>13</sup>C Spectra of compound 3e (CDCl<sub>3</sub>)**

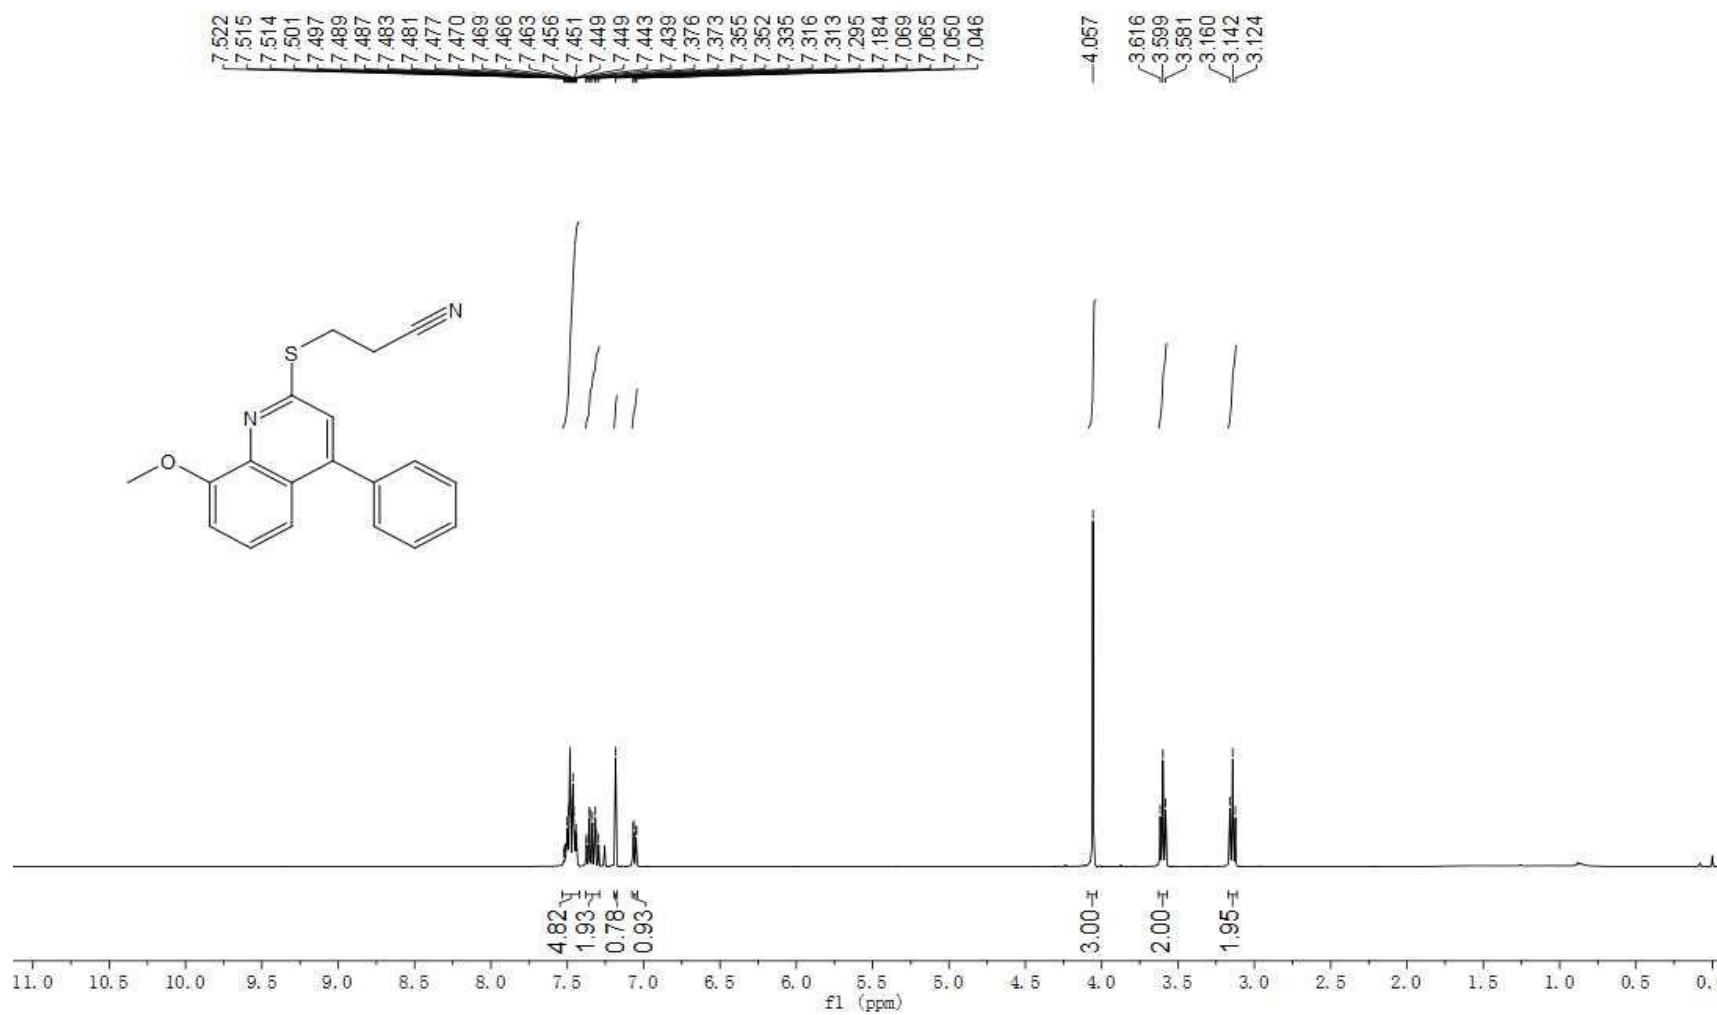

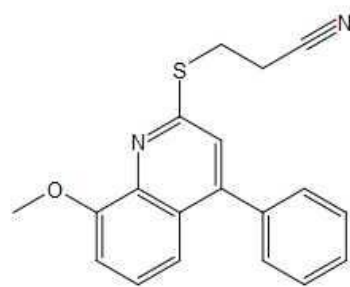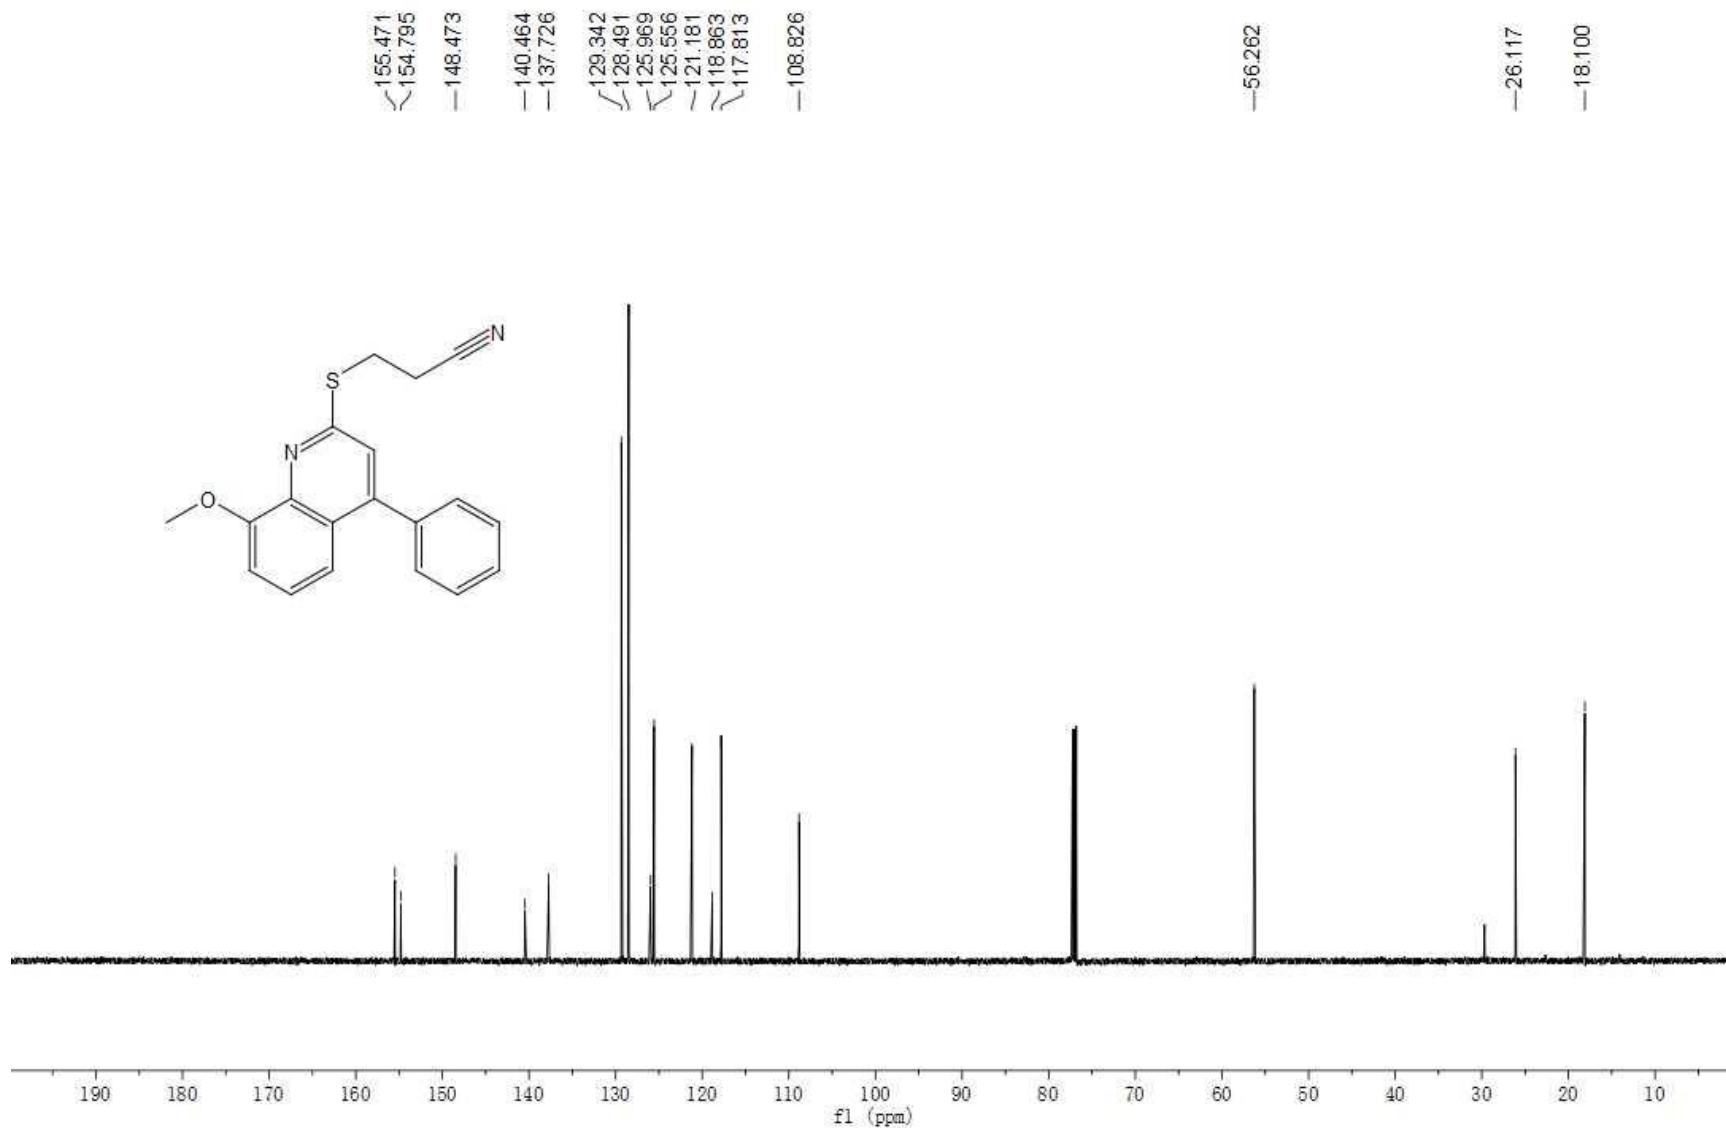

**<sup>1</sup>H and <sup>13</sup>C Spectra of compound 3f (CDCl<sub>3</sub>)**

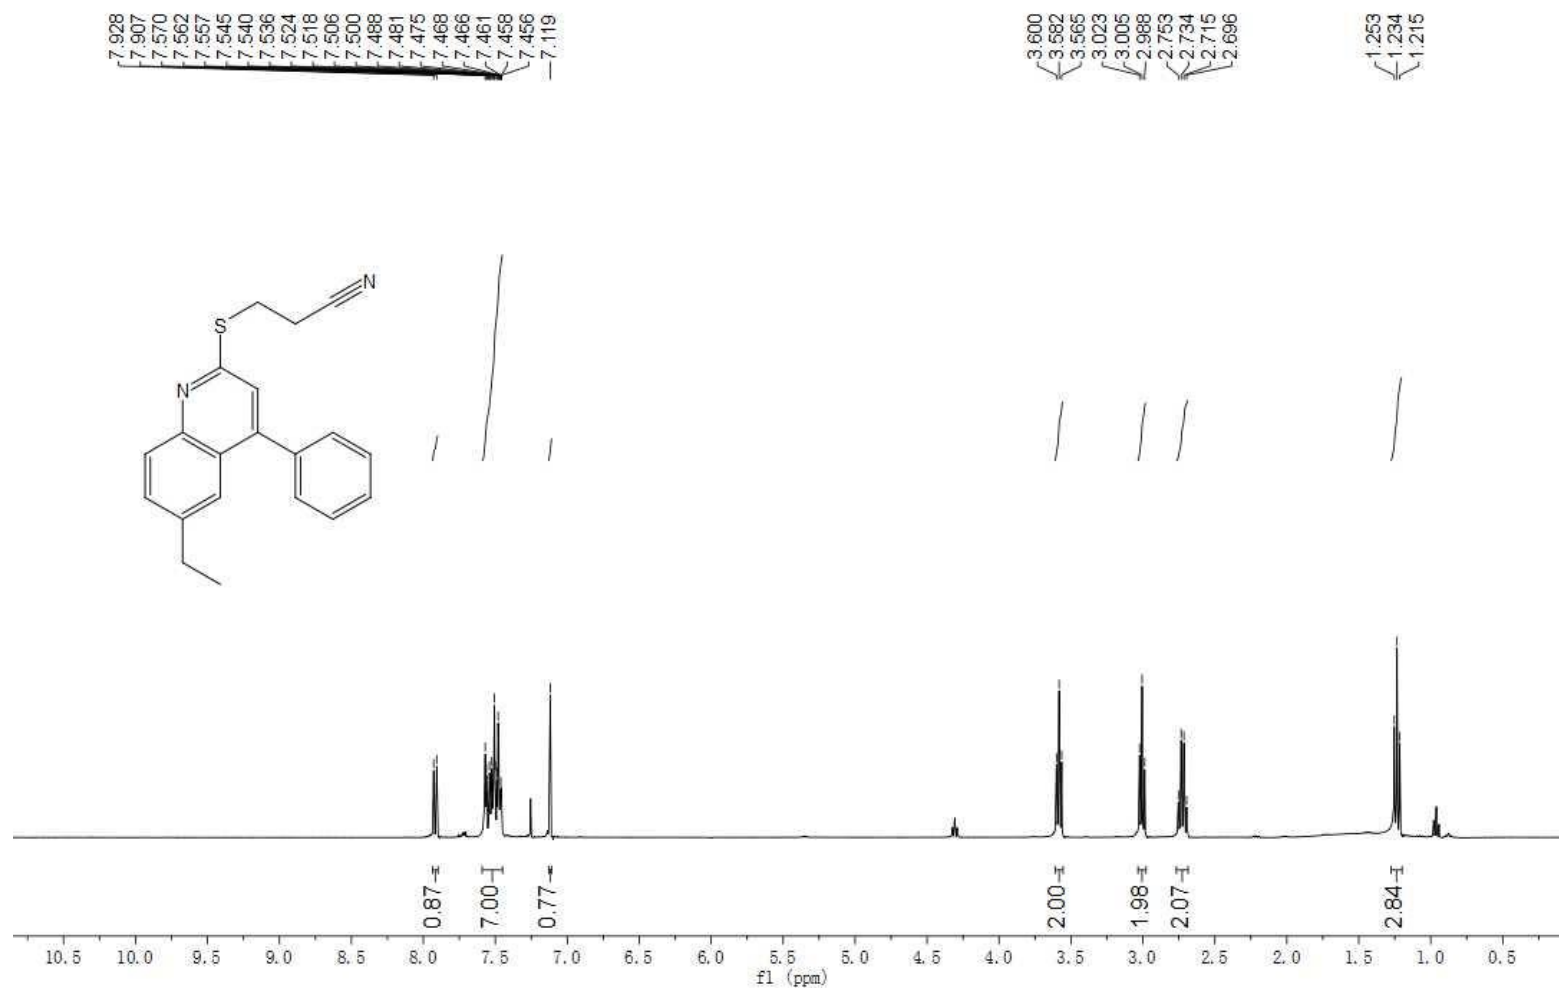

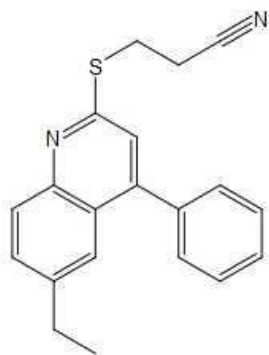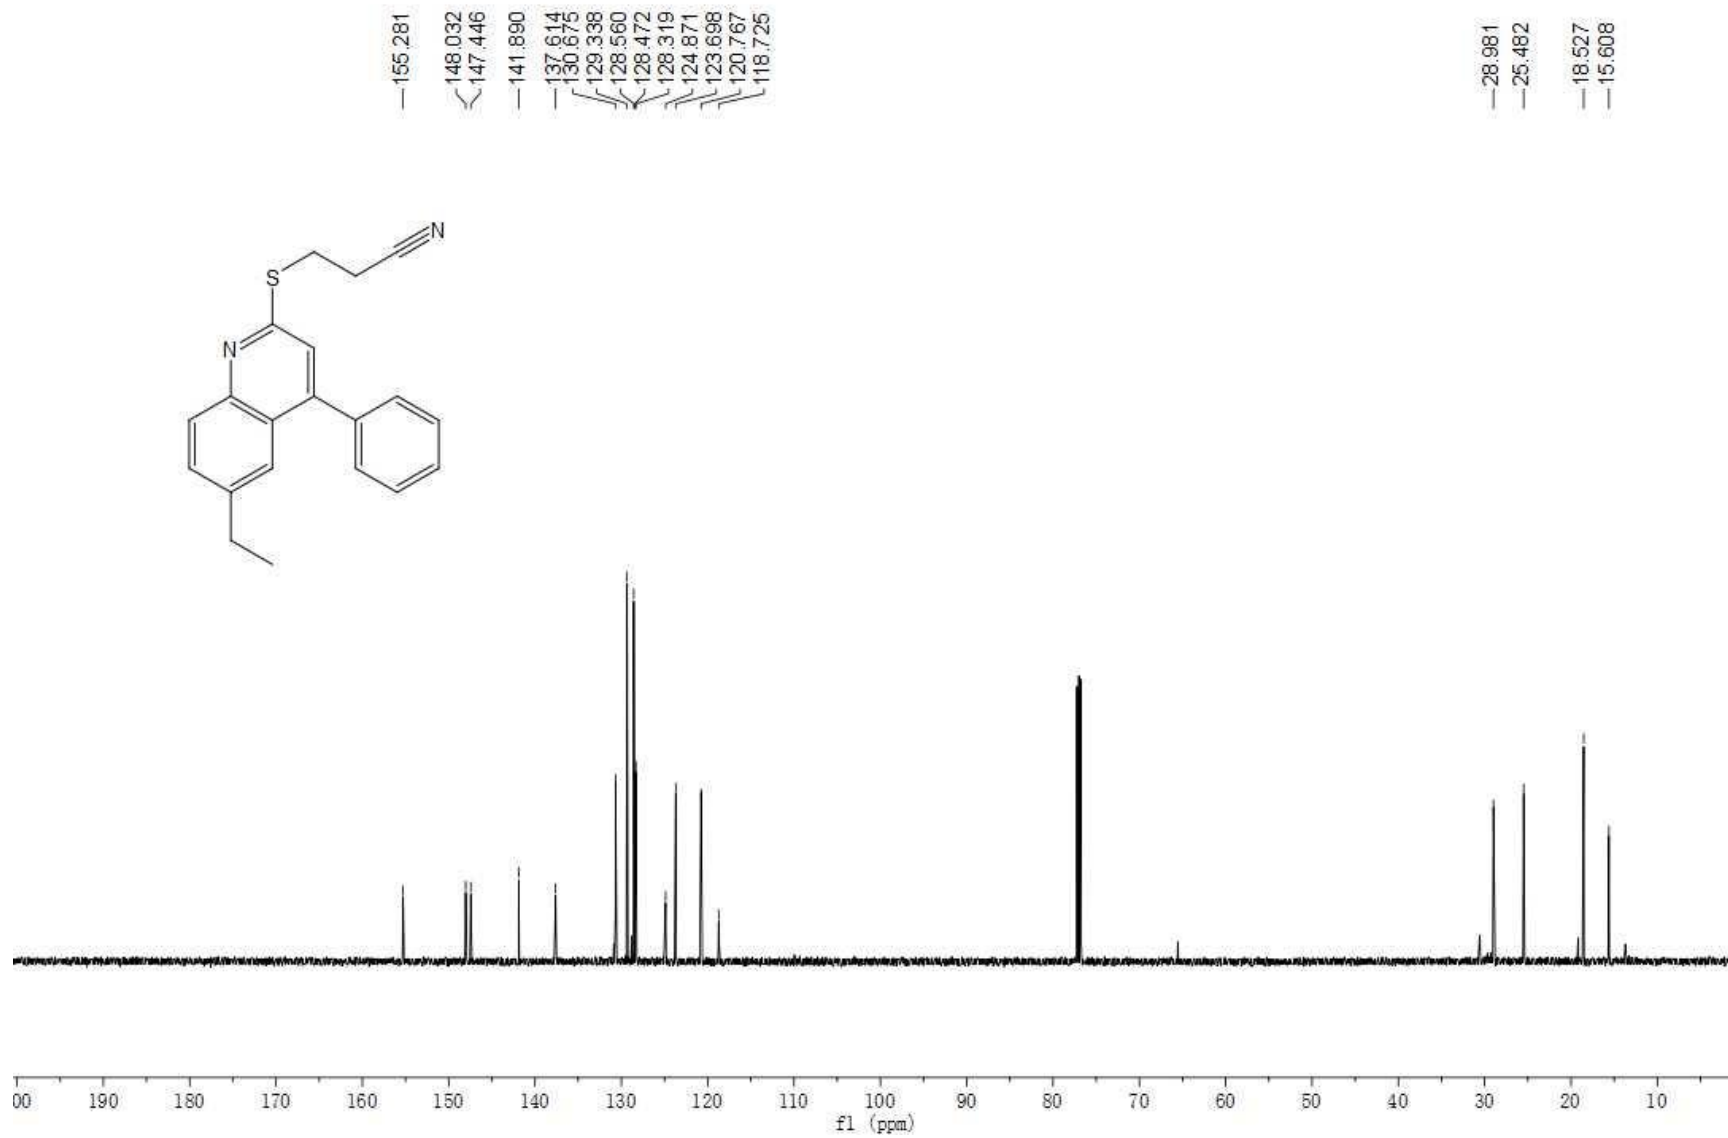



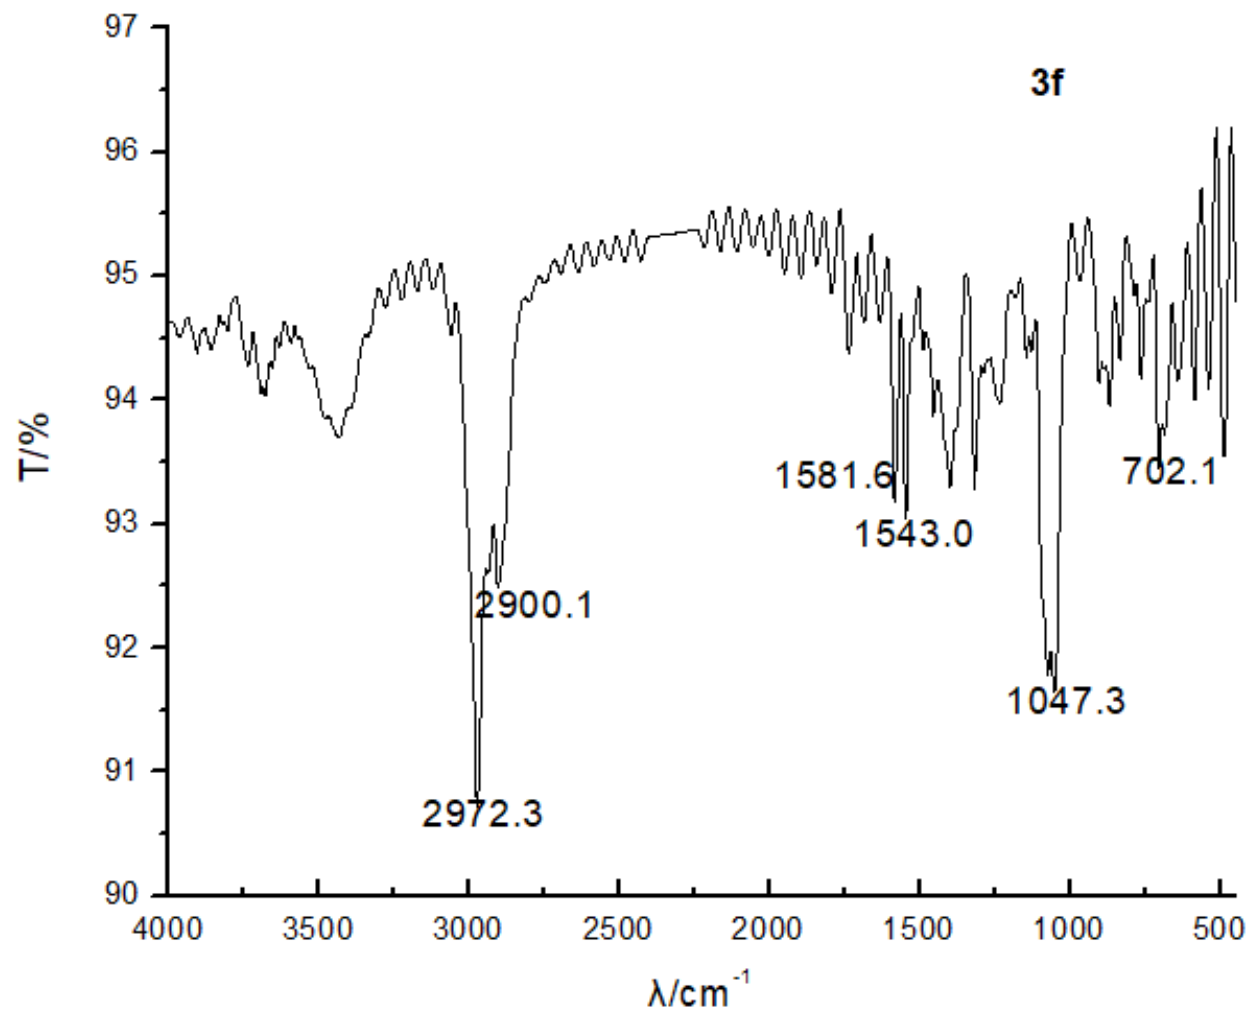

**<sup>1</sup>H and <sup>13</sup>C Spectra of compound 3g (CDCl<sub>3</sub>)**

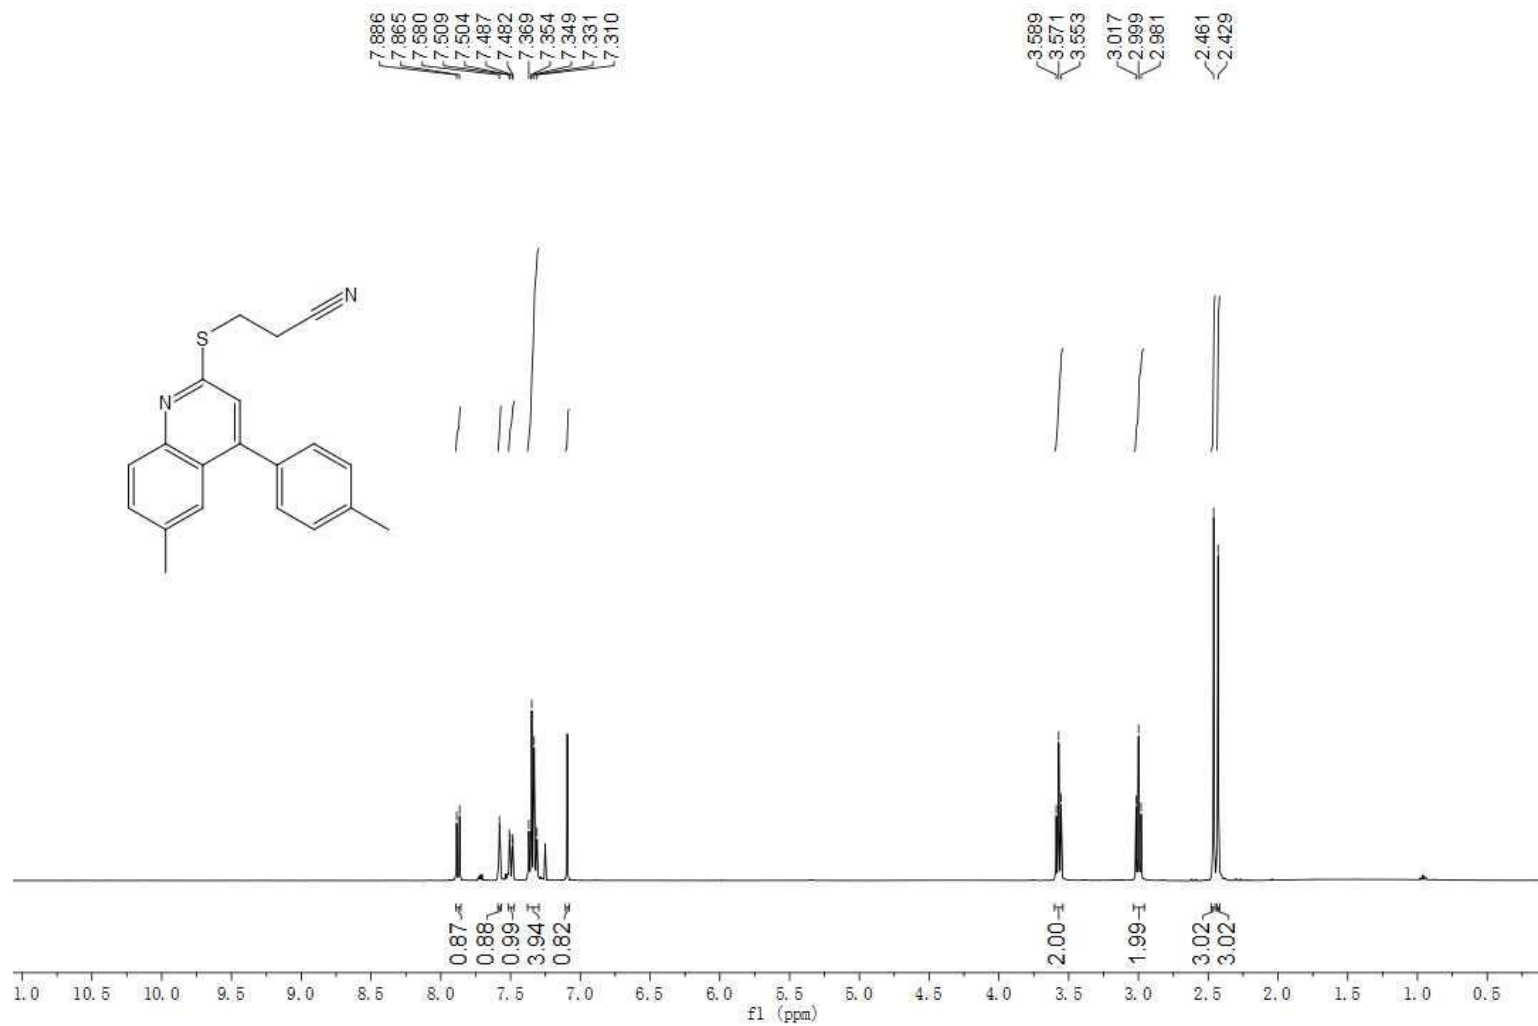

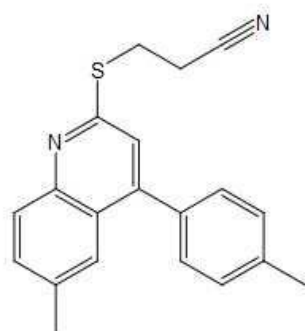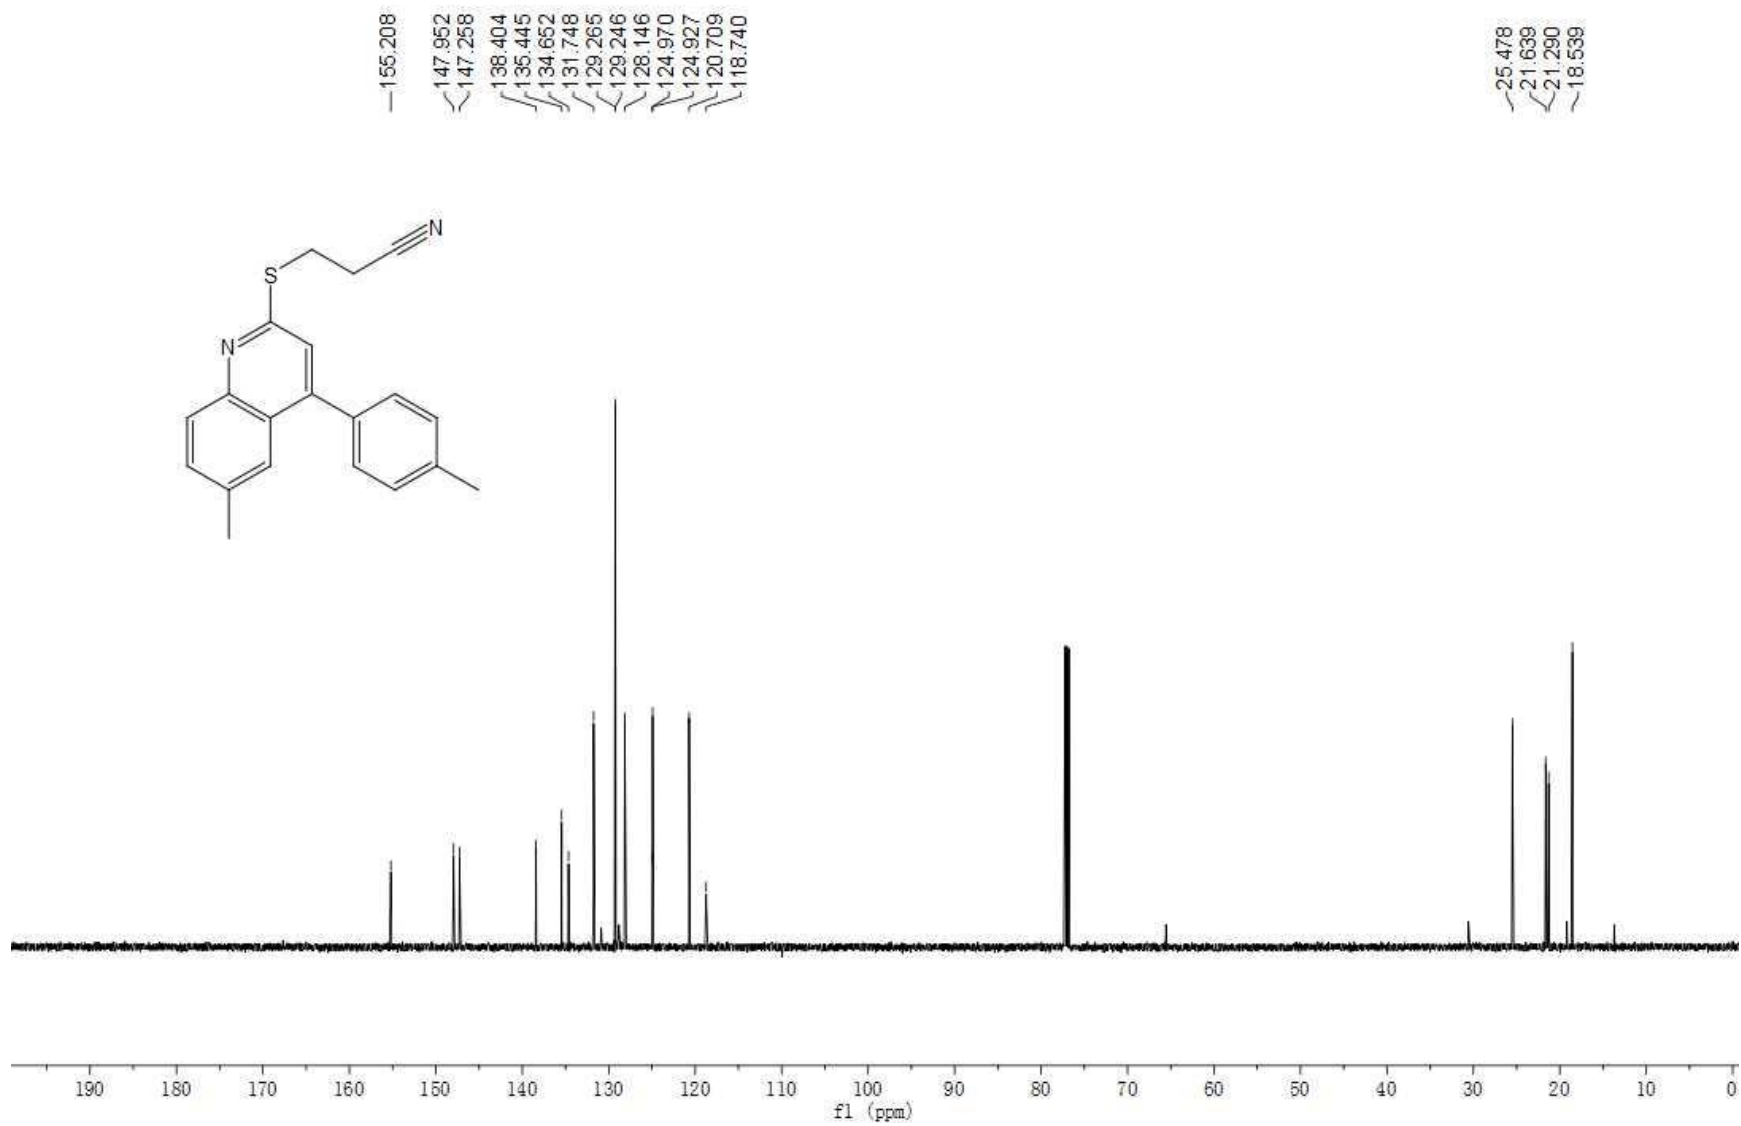

**$^1\text{H}$  and  $^{13}\text{C}$  Spectra of compound 3h ( $\text{CDCl}_3$ )**

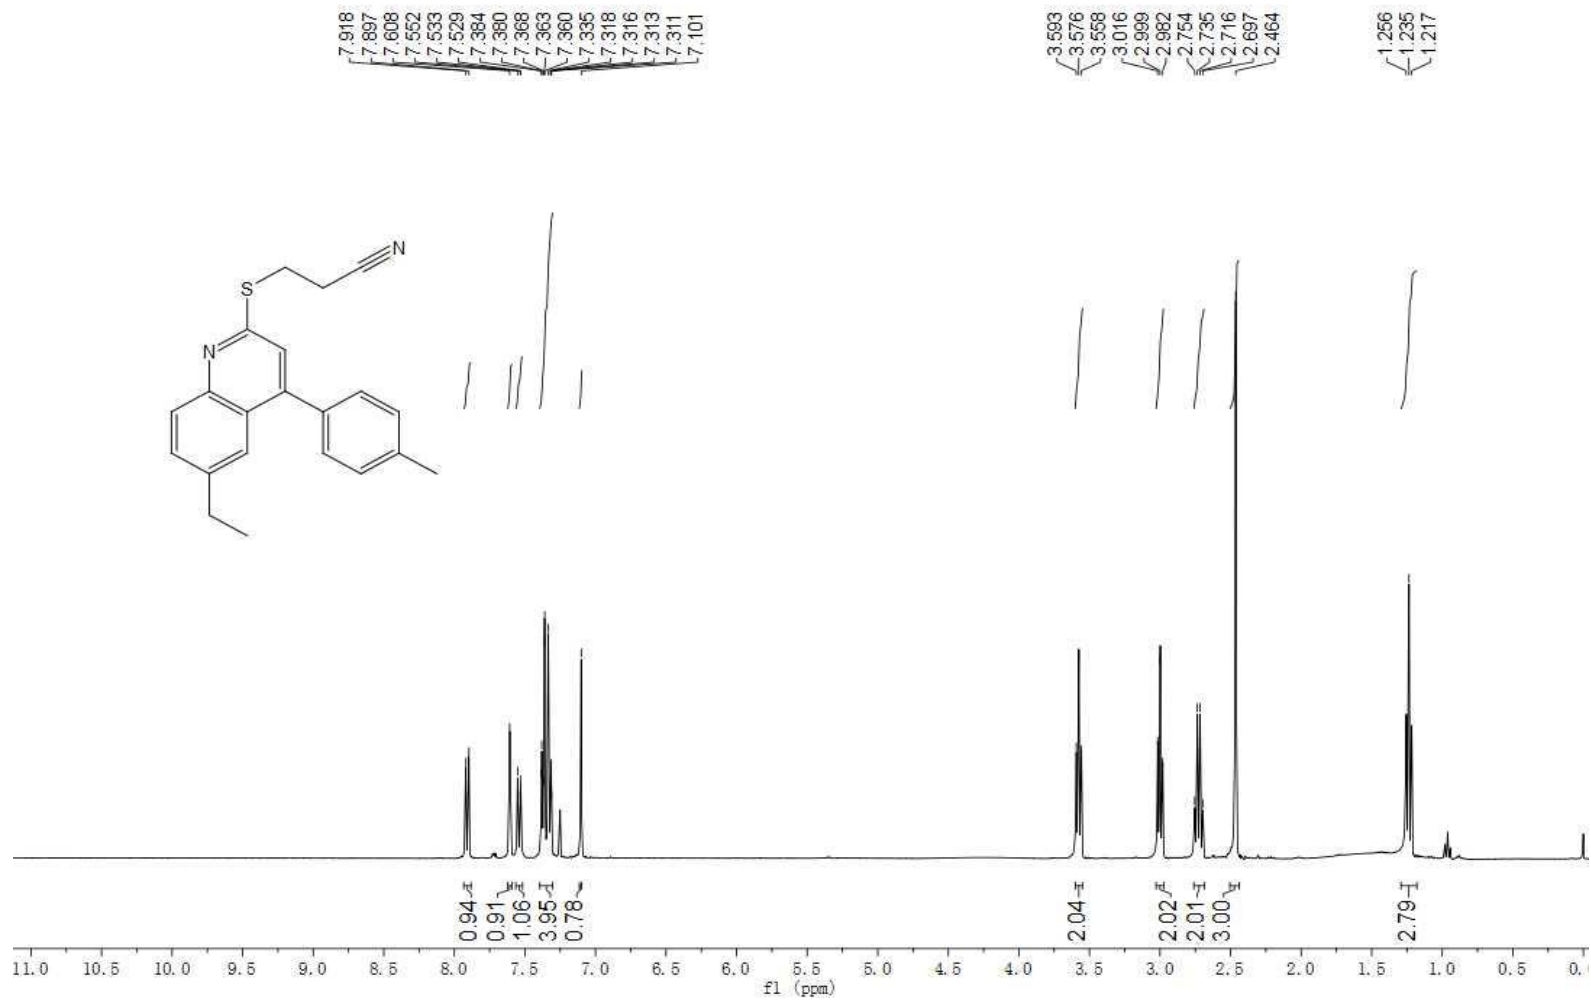

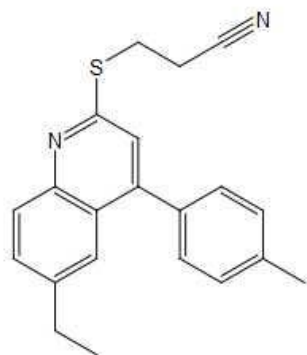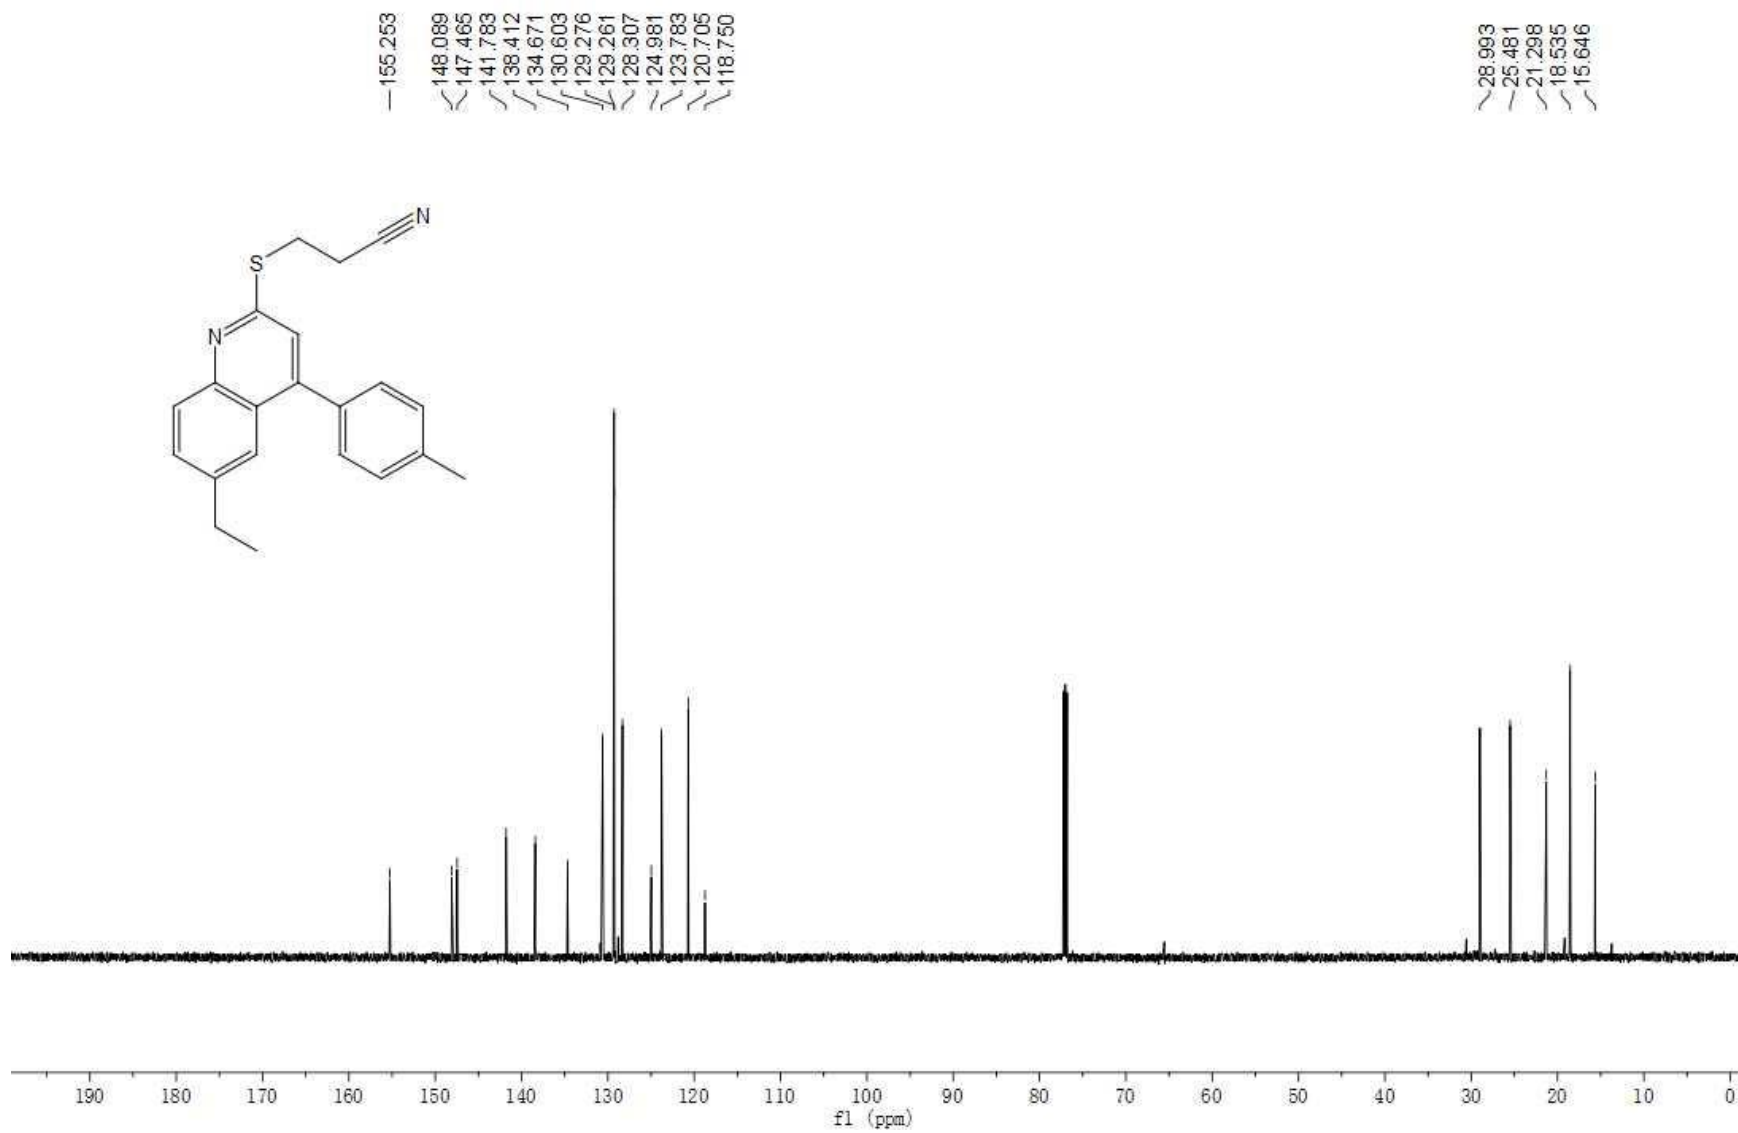

**<sup>1</sup>H and <sup>13</sup>C Spectra of compound 3i (CDCl<sub>3</sub>)**

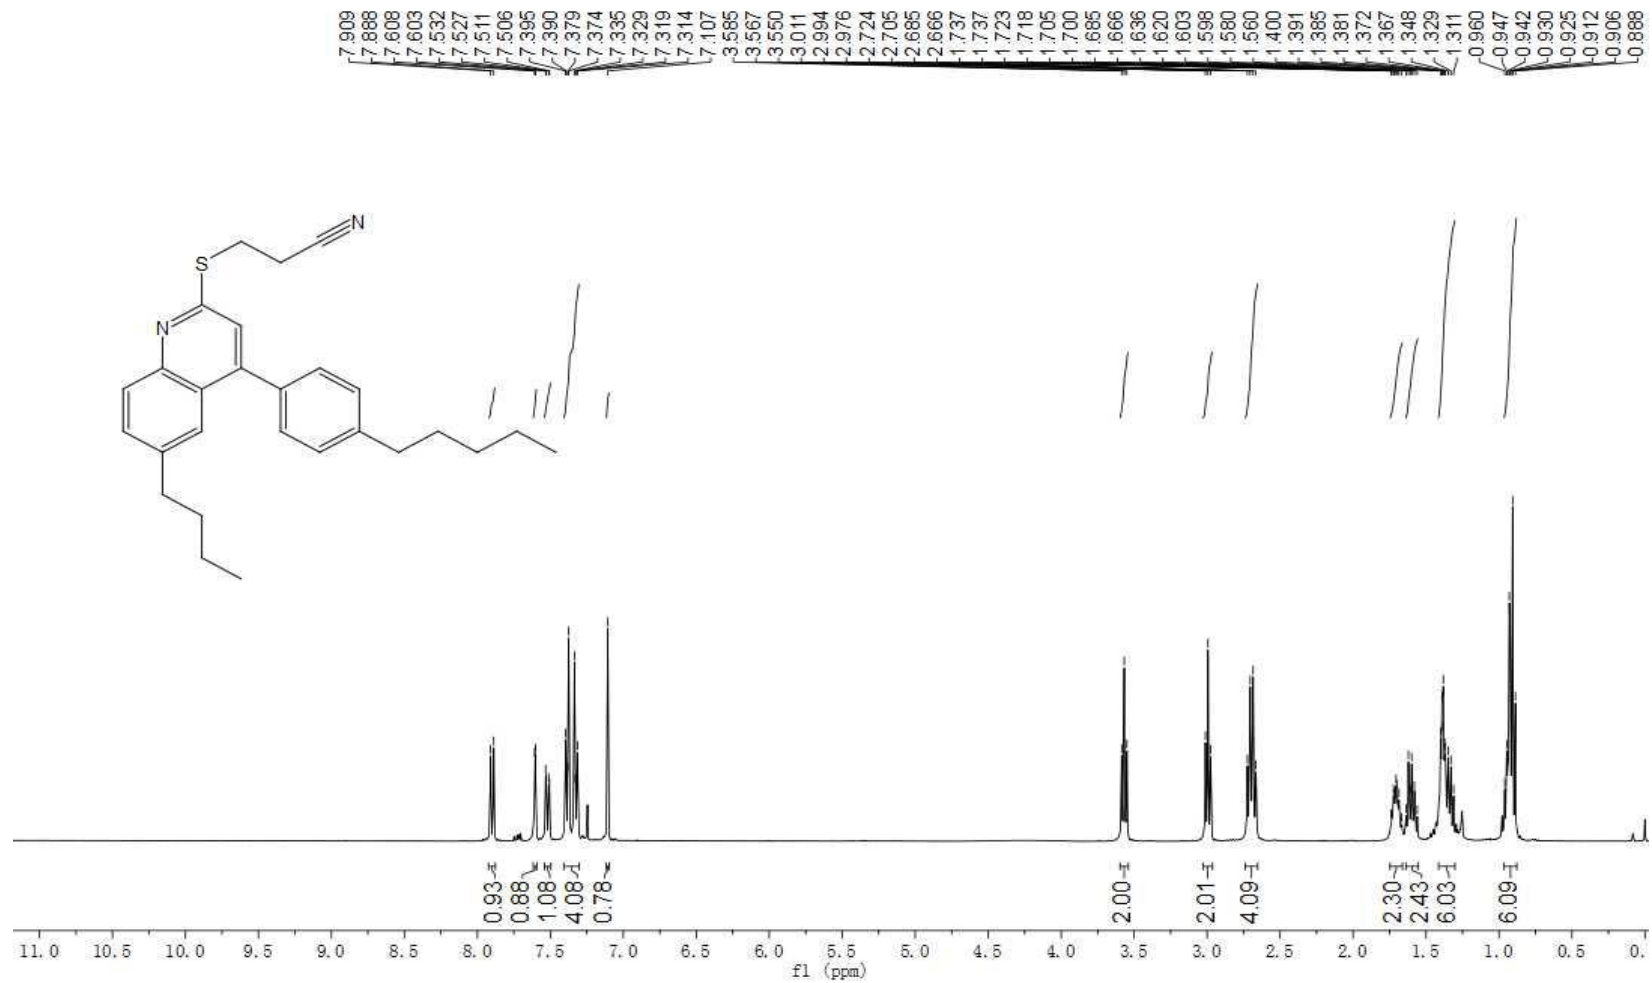

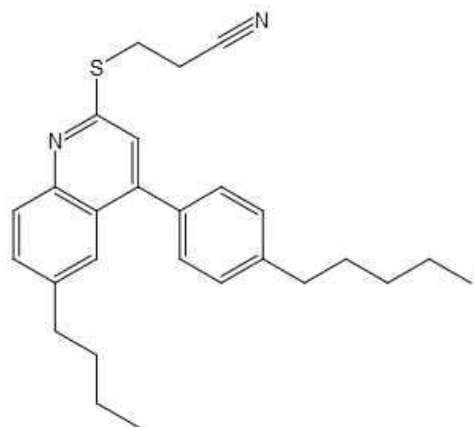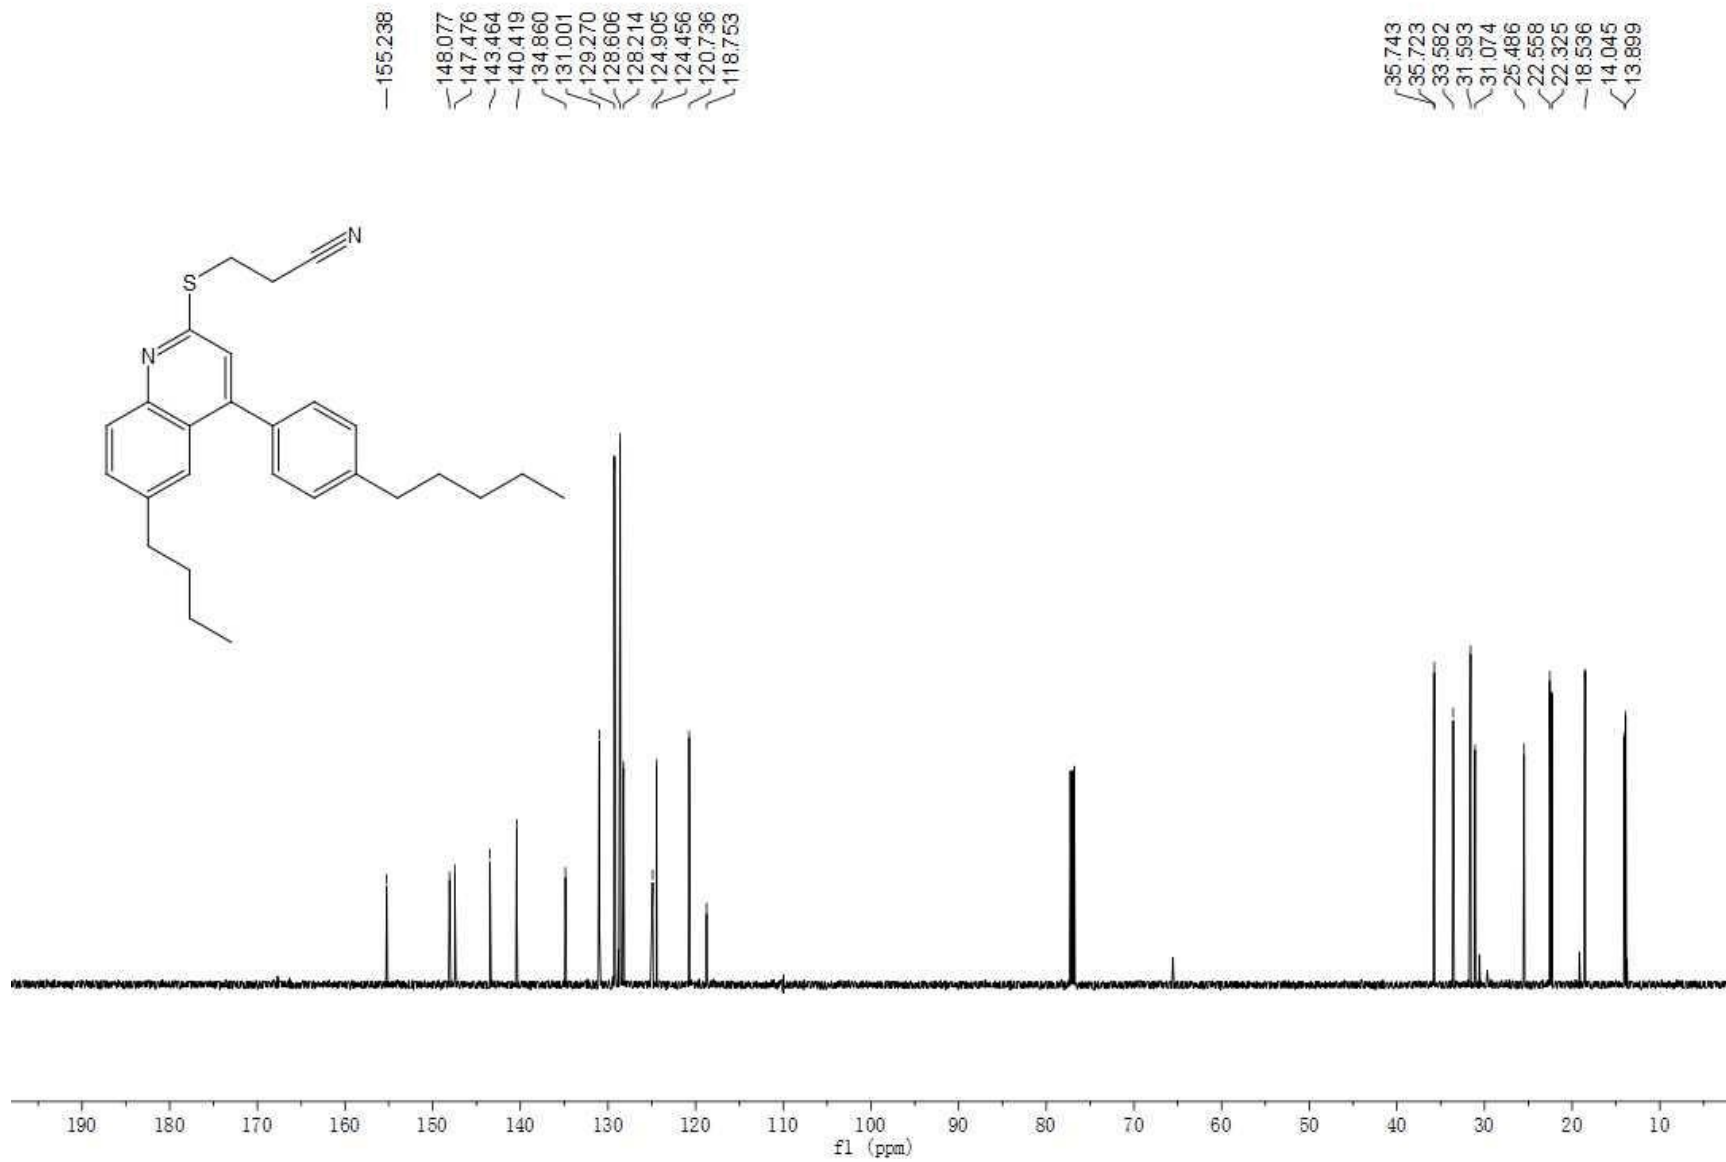

**<sup>1</sup>H and <sup>13</sup>C Spectra of compound 3j (CDCl<sub>3</sub>)**

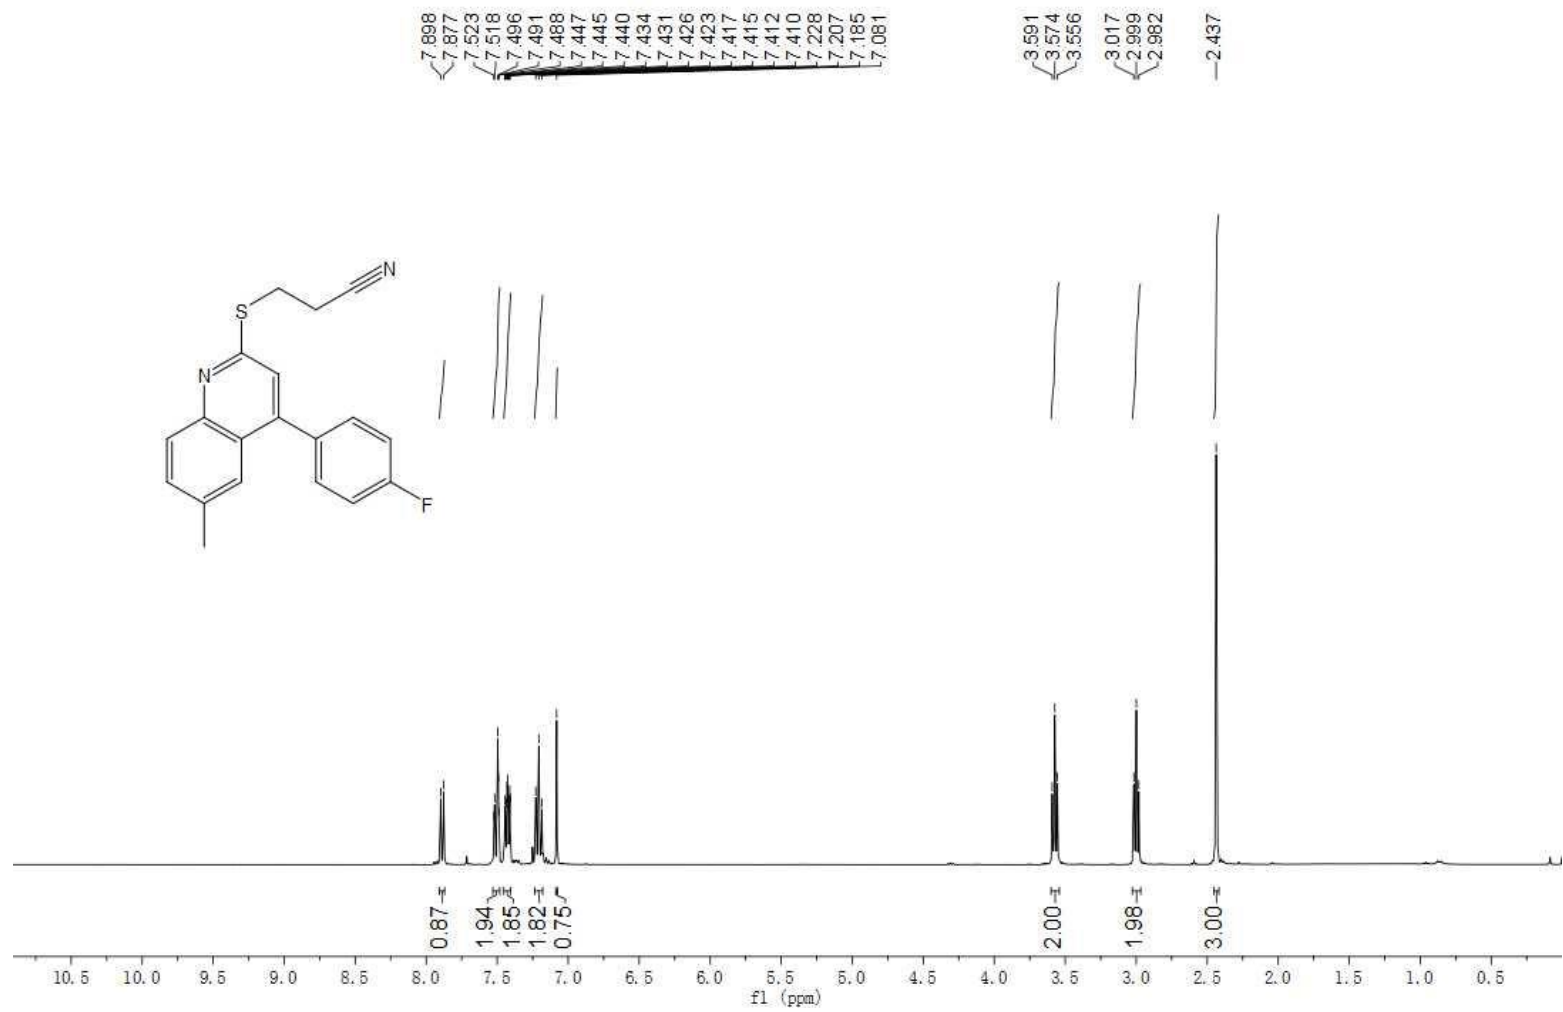



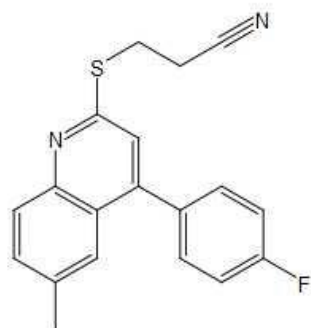

~163.722  
 ~162.075  
 ~155.289  
 ~147.239  
 ~146.809  
 ~135.725  
 ~133.530  
 ~133.508  
 ~131.932  
 ~131.077  
 ~131.023  
 ~128.250  
 ~124.824  
 ~124.595  
 ~120.823  
 ~118.690  
 ~115.732  
 ~115.590

~25.477  
 ~21.673  
 ~18.519

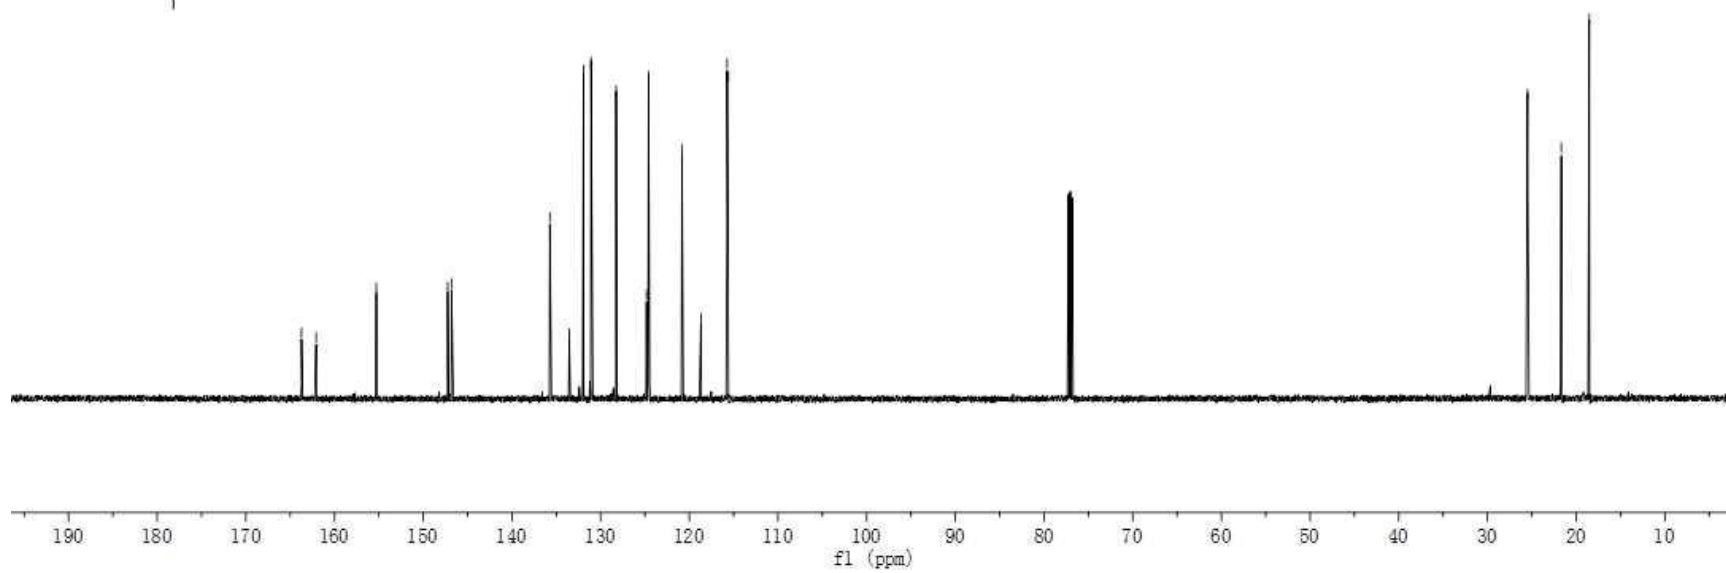

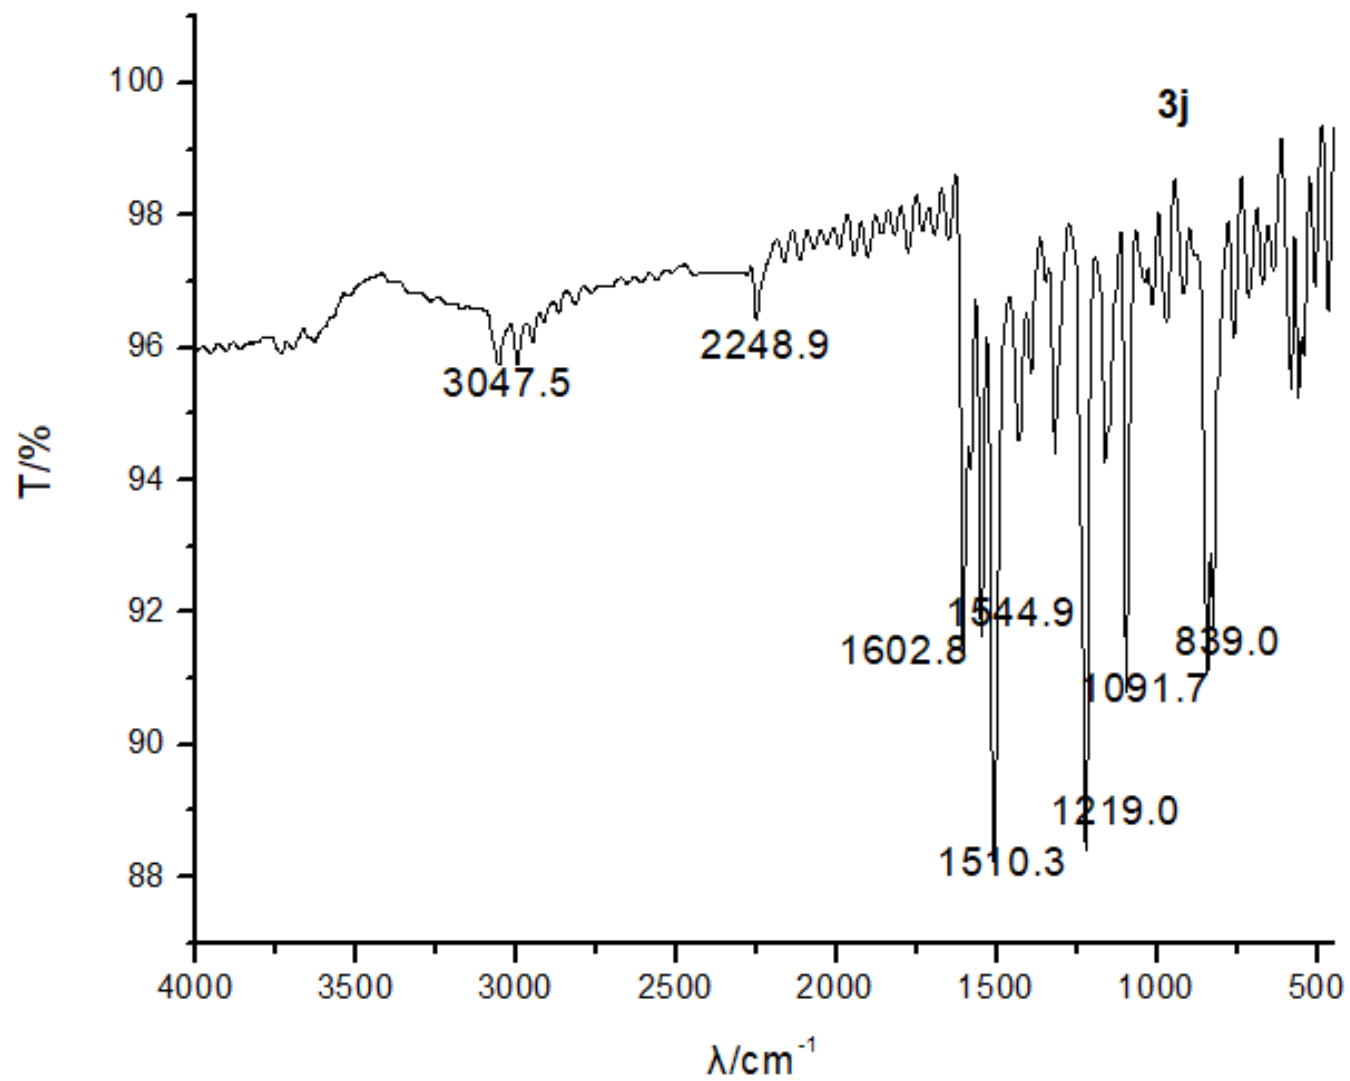

**<sup>1</sup>H and <sup>13</sup>C Spectra of compound 3k (CDCl<sub>3</sub>)**

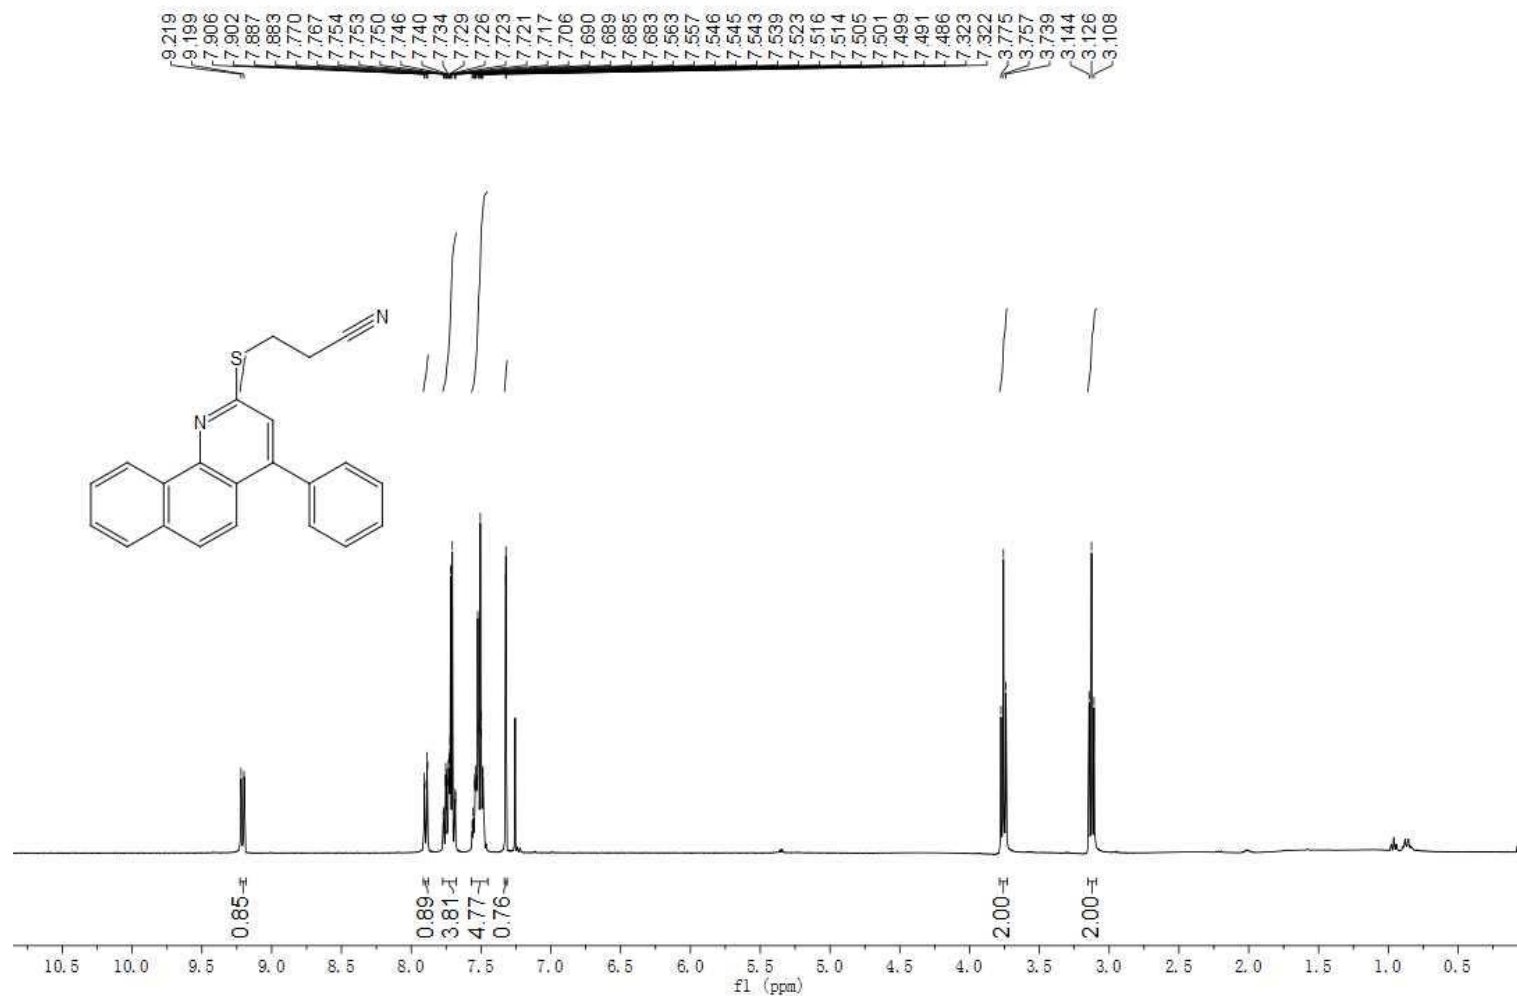

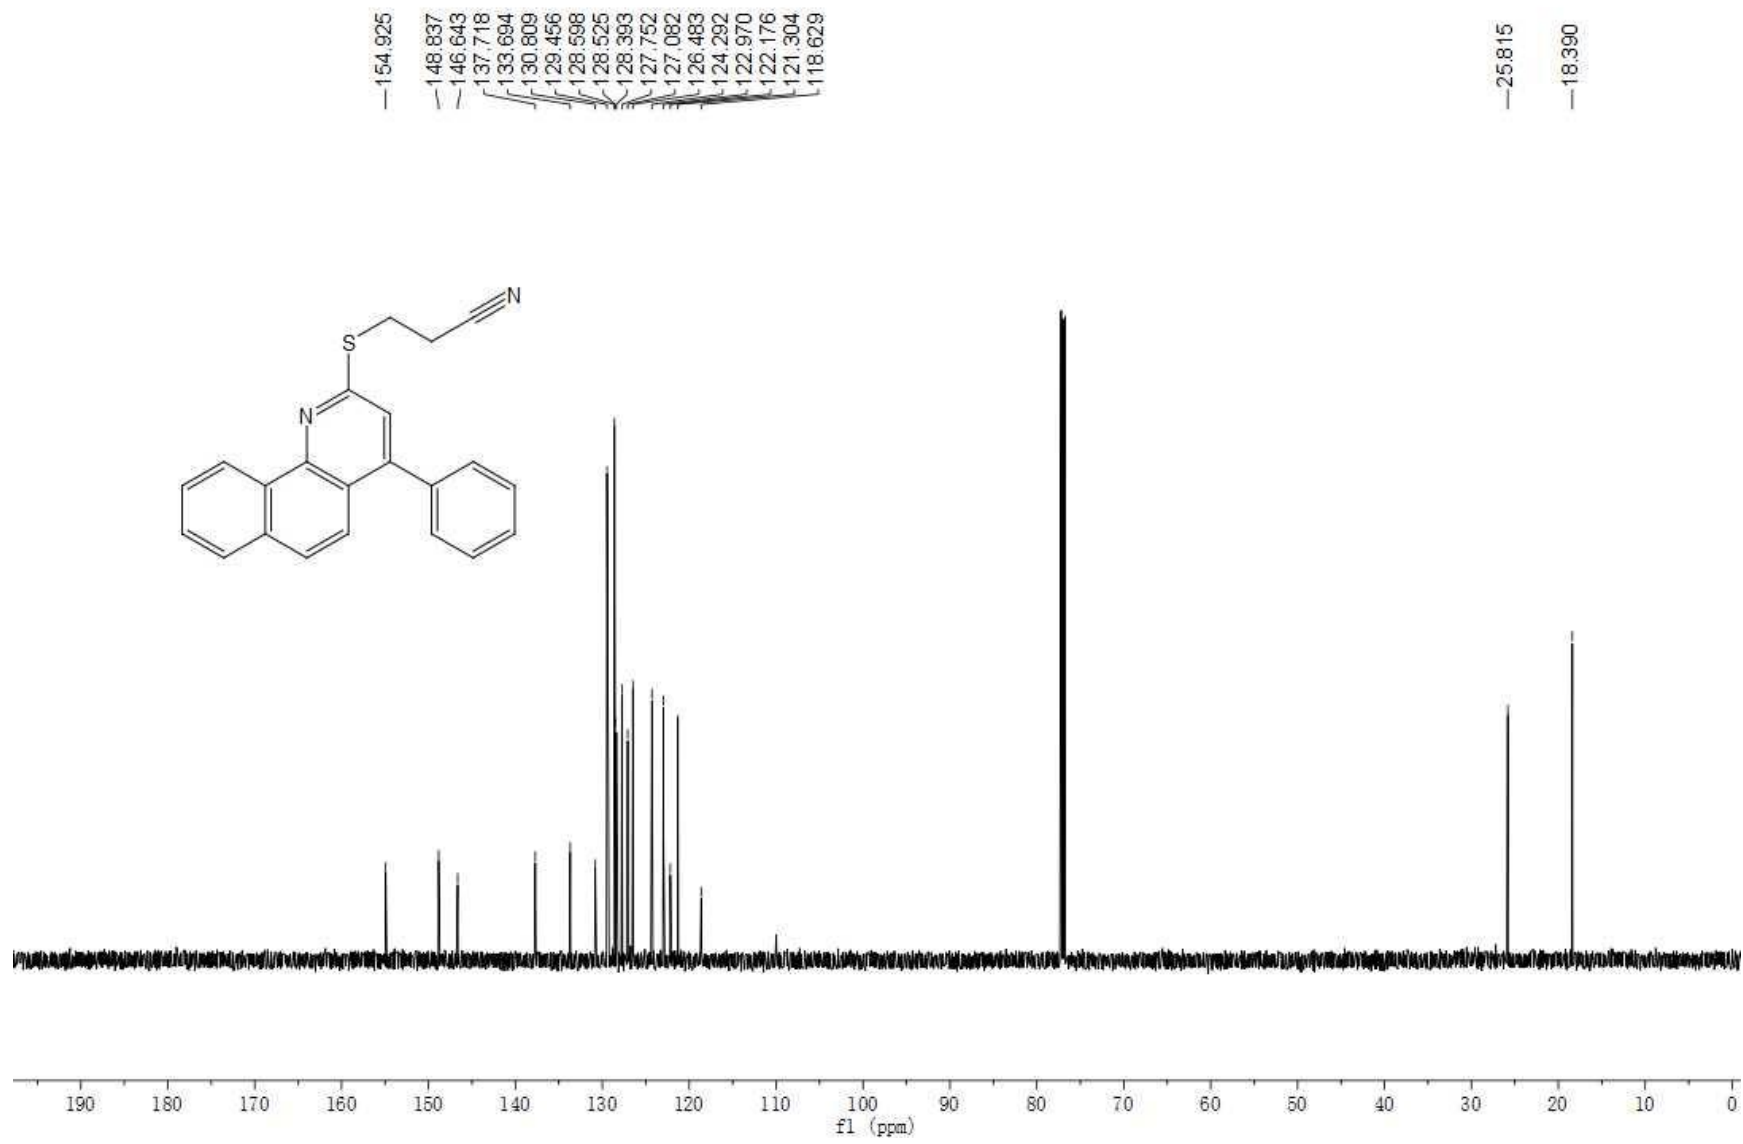

# <sup>1</sup>H and <sup>13</sup>C Spectra of compound 3l (CDCl<sub>3</sub>)

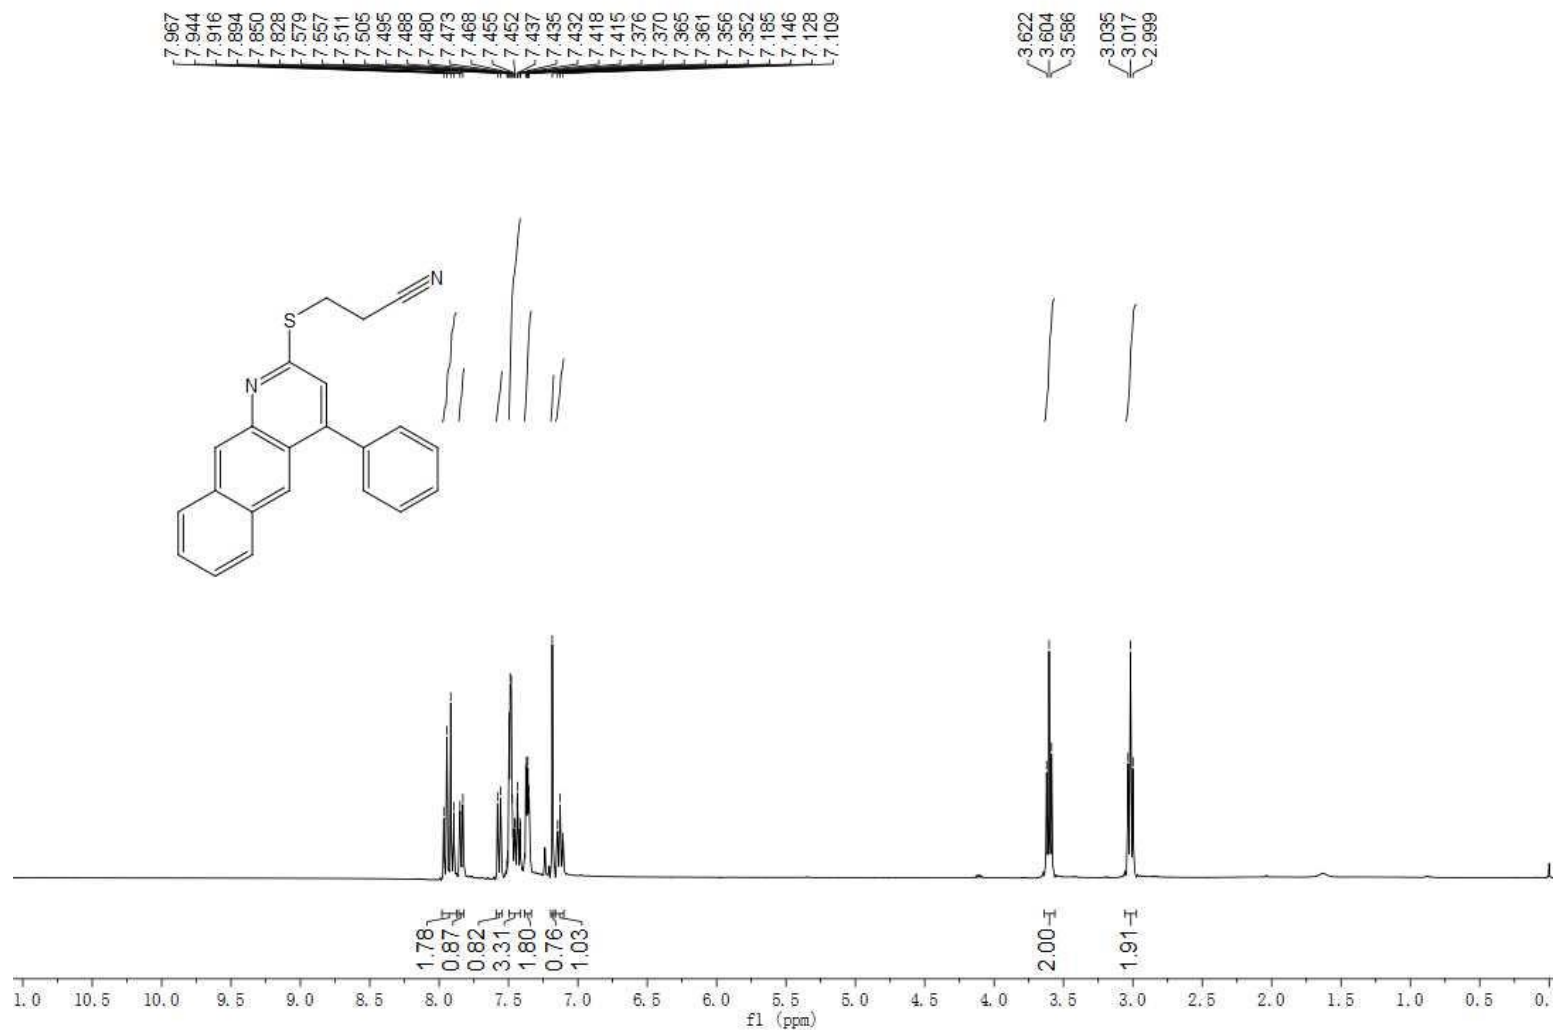

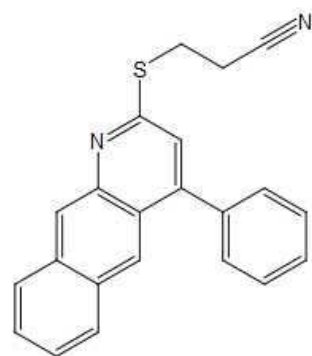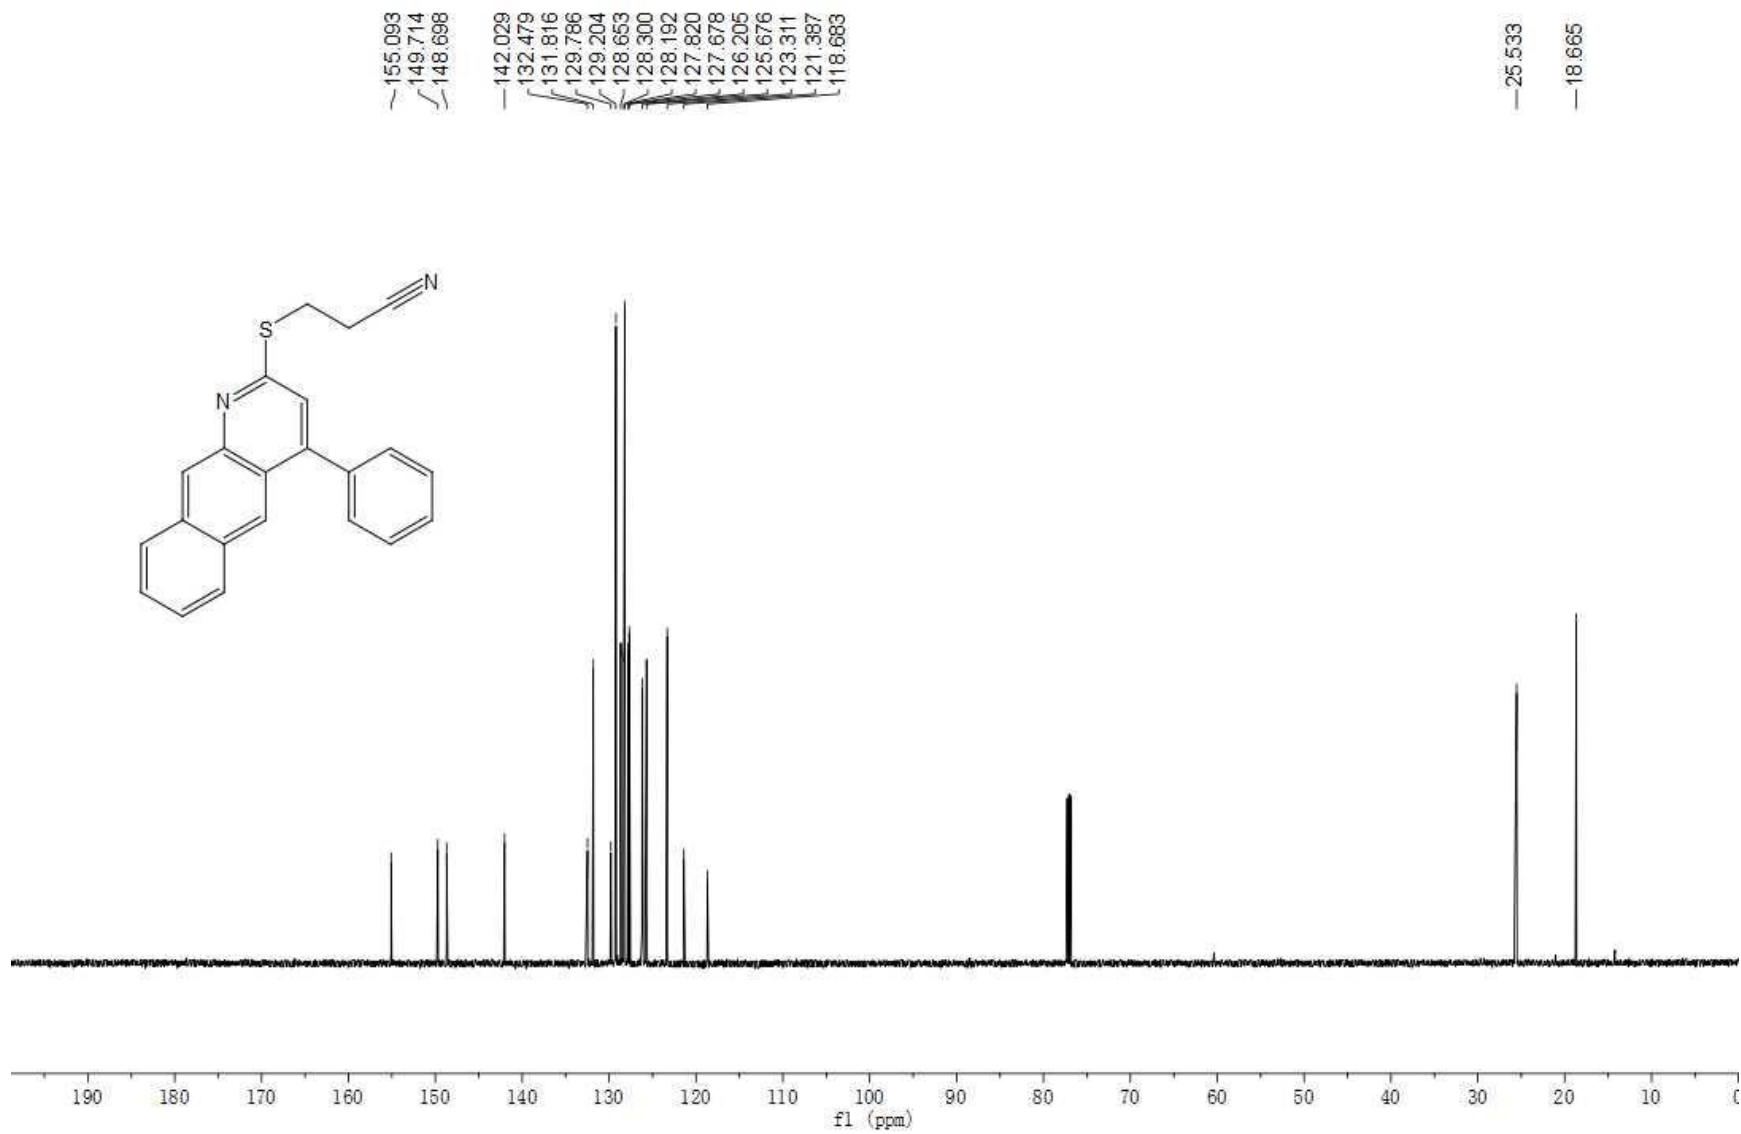

**<sup>1</sup>H and <sup>13</sup>C Spectra of compound 3m (CDCl<sub>3</sub>)**

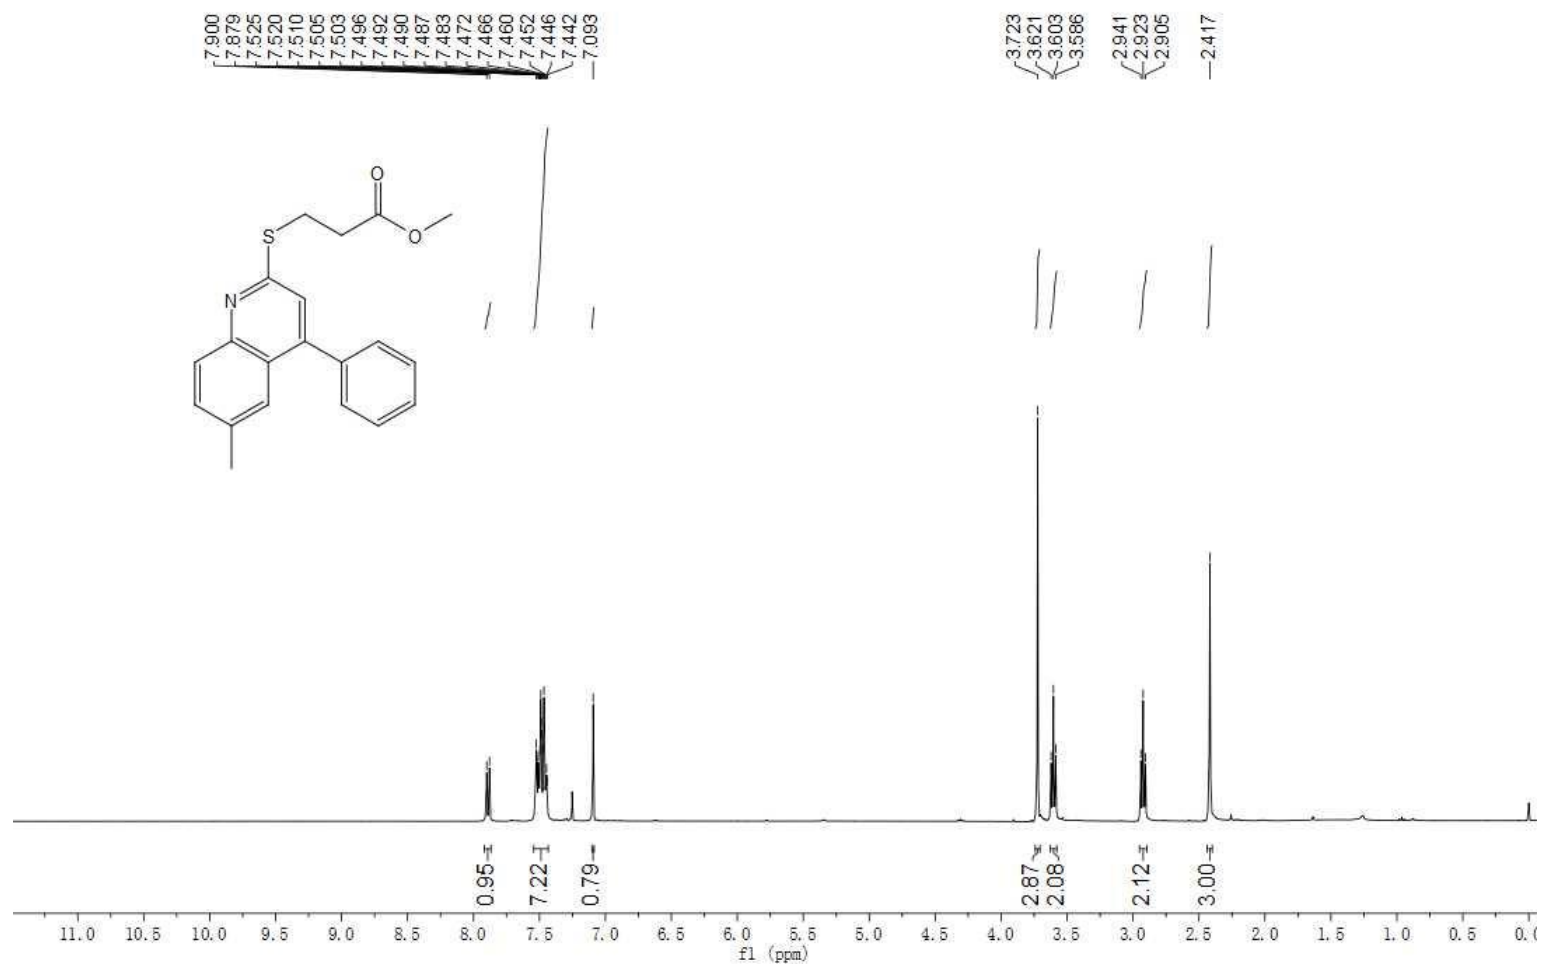

— 173.030  
— 156.909  
— 147.574  
138.074  
135.359  
131.793  
129.612  
128.747  
128.564  
128.473  
124.990  
124.935  
121.150

— 52.009

— 34.723

— 24.951  
— 21.895

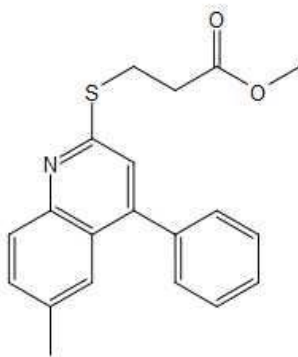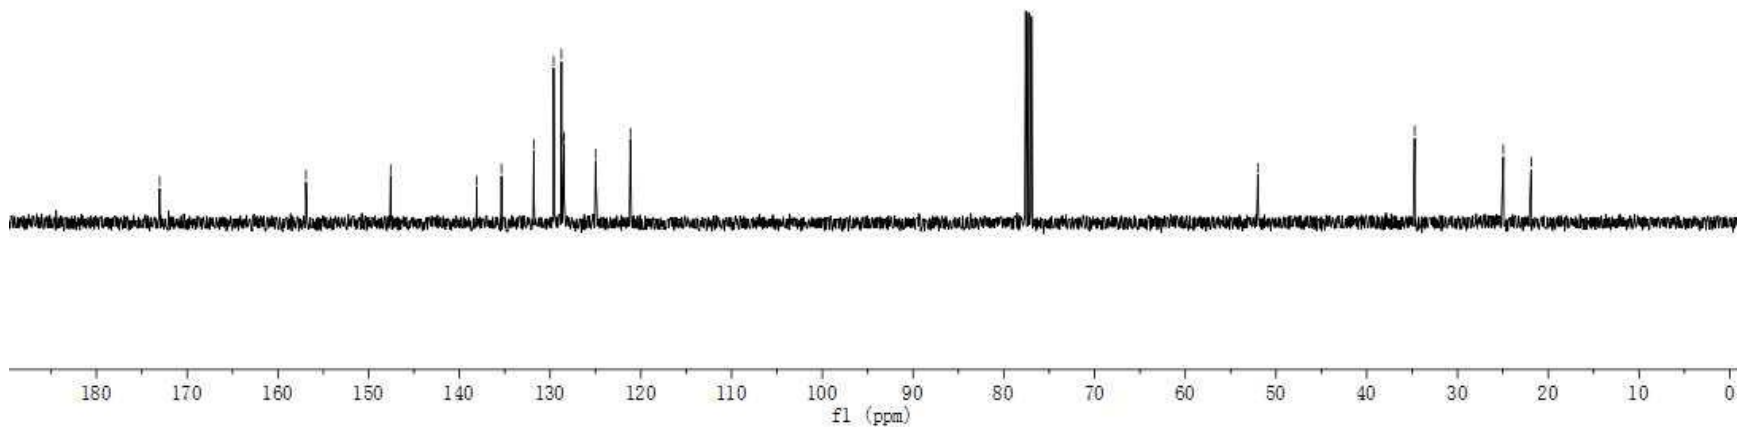



# $^1\text{H}$ and $^{13}\text{C}$ Spectra of compound 3n ( $\text{CDCl}_3$ )

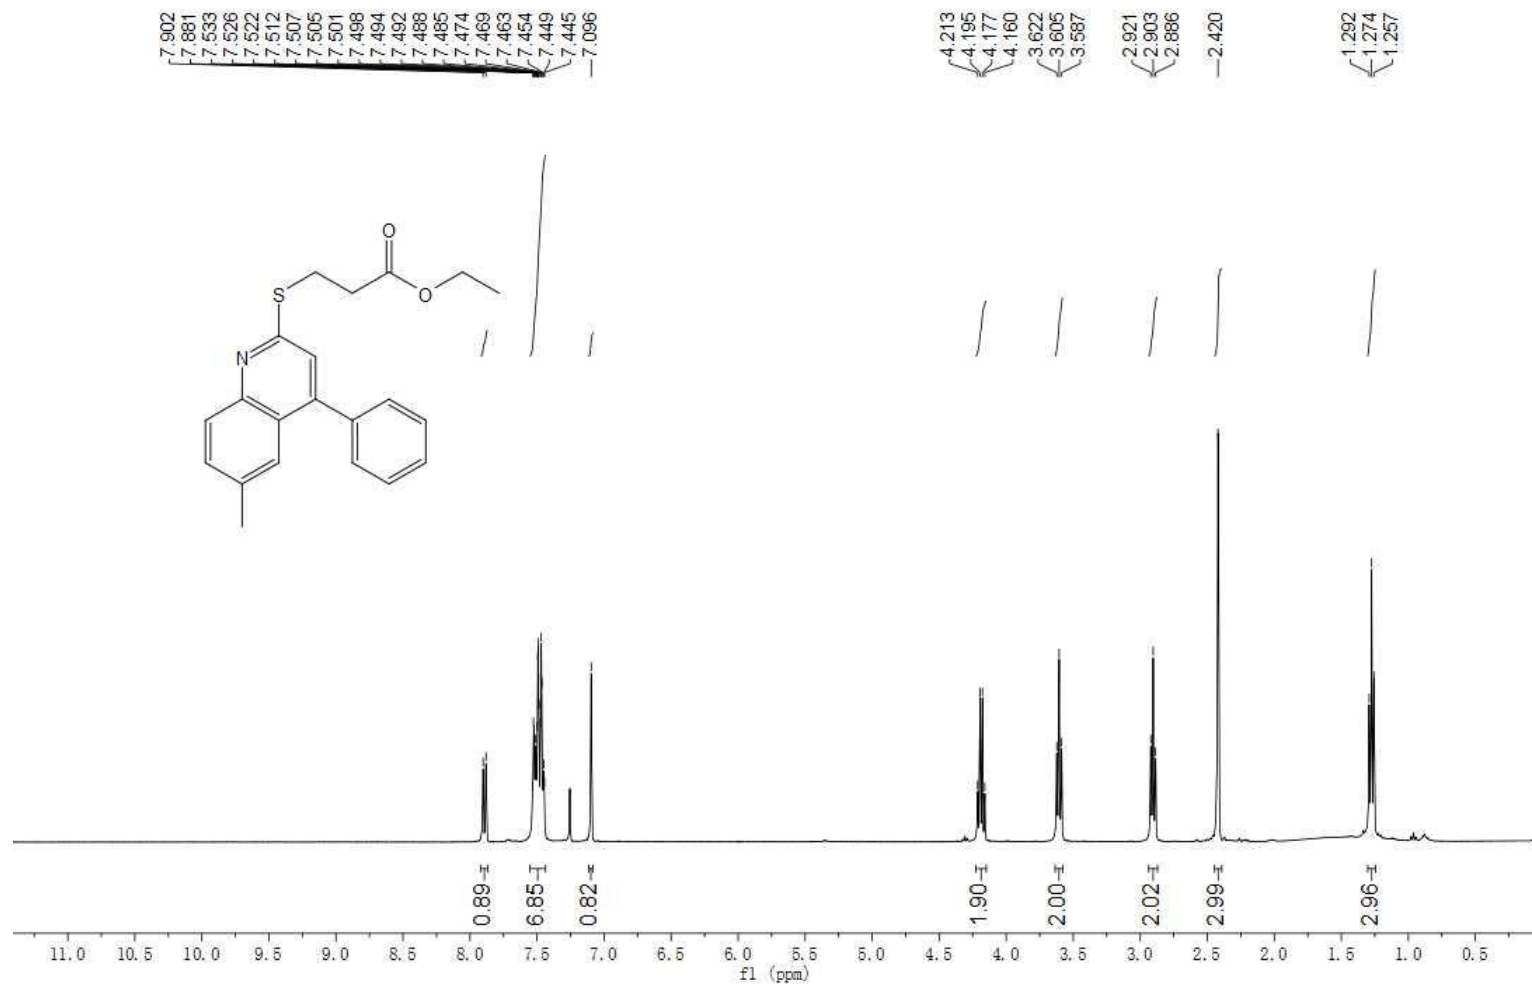

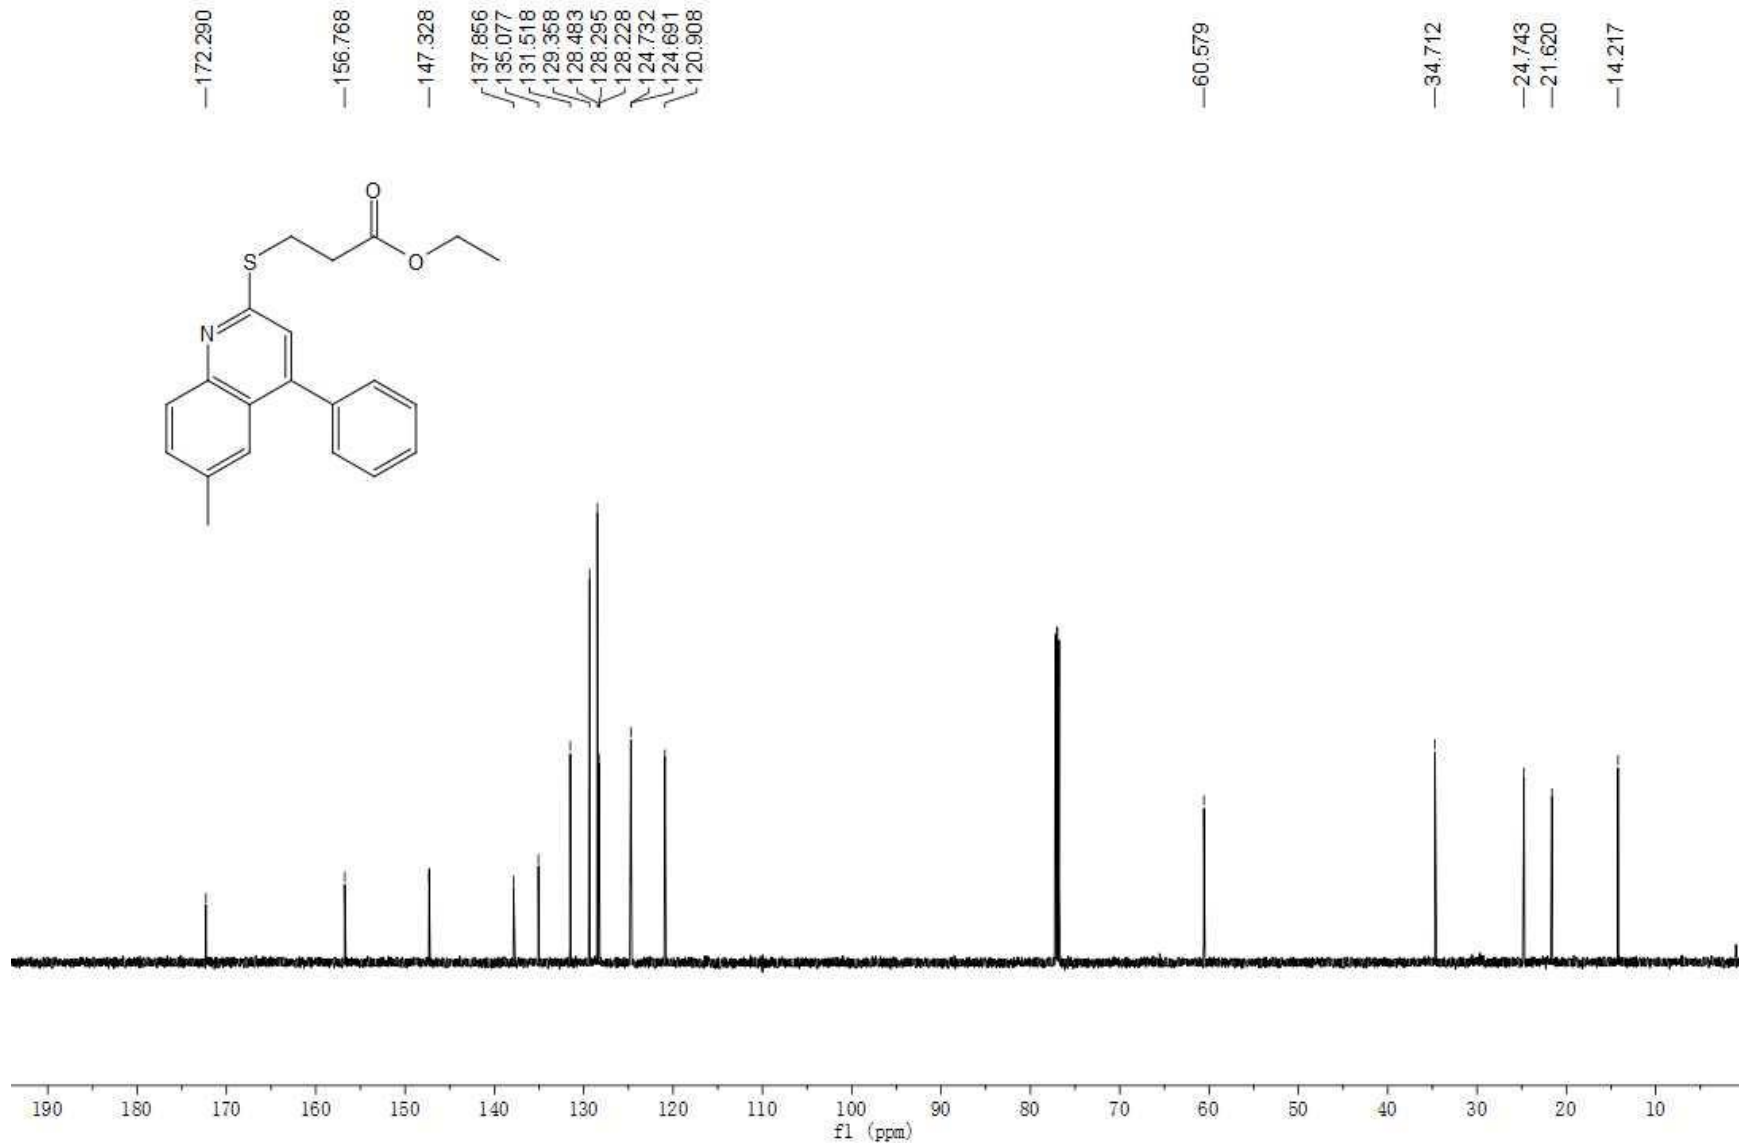

**<sup>1</sup>H and <sup>13</sup>C Spectra of compound 3o (CDCl<sub>3</sub>)**

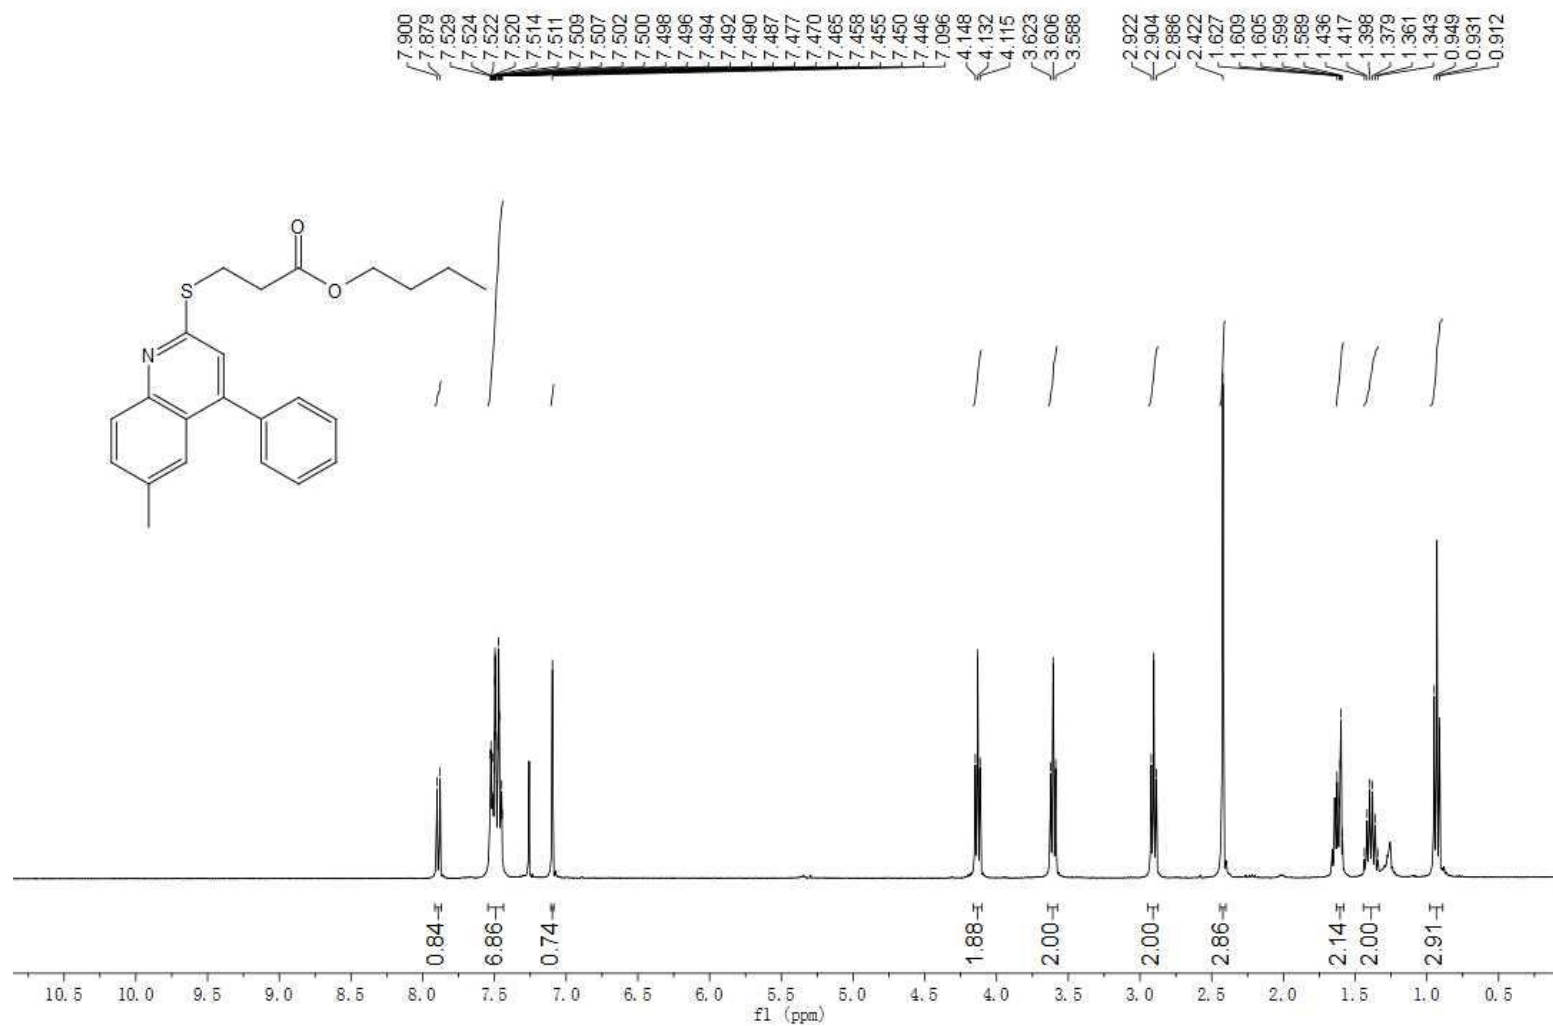

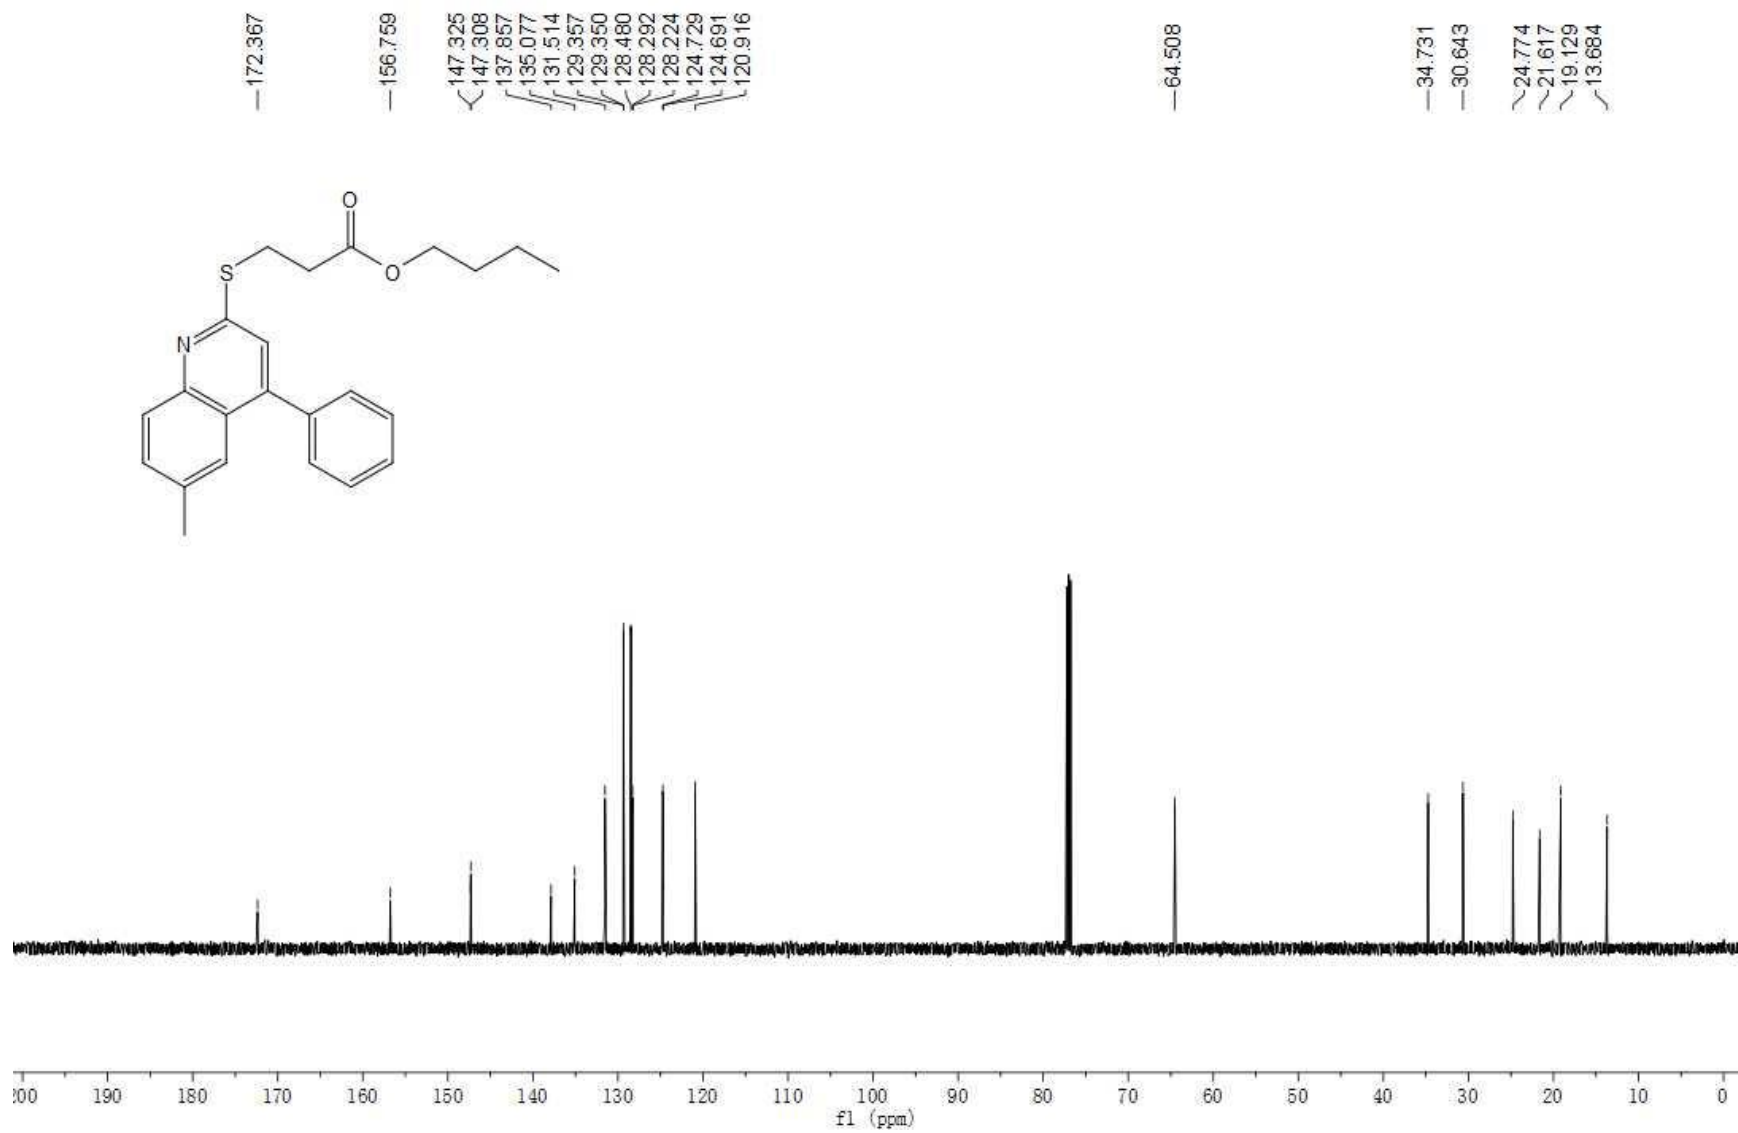

**<sup>1</sup>H and <sup>13</sup>C Spectra of compound 4a (CDCl<sub>3</sub>)**

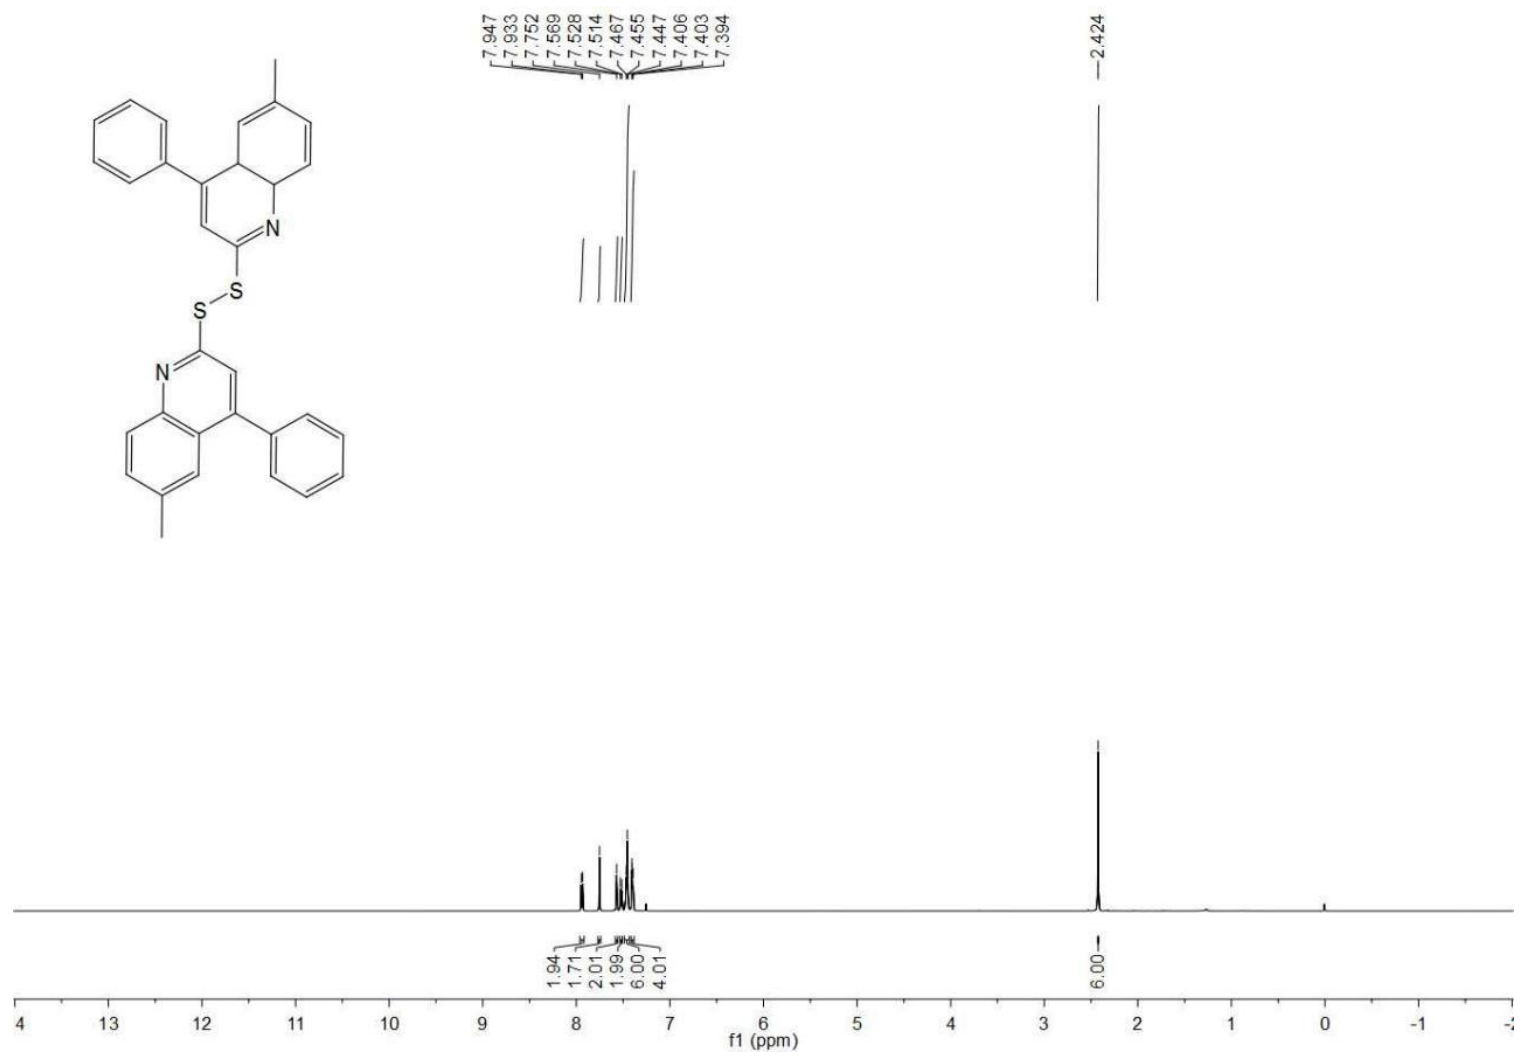

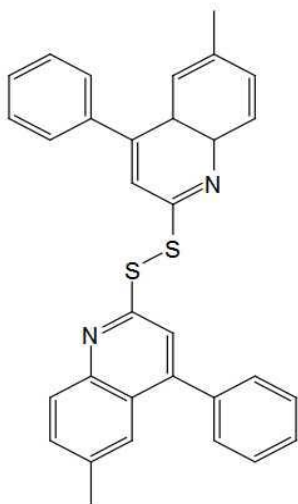

157.75  
149.28  
147.07  
137.68  
136.33  
132.28  
129.46  
128.53  
128.49  
124.43

21.74

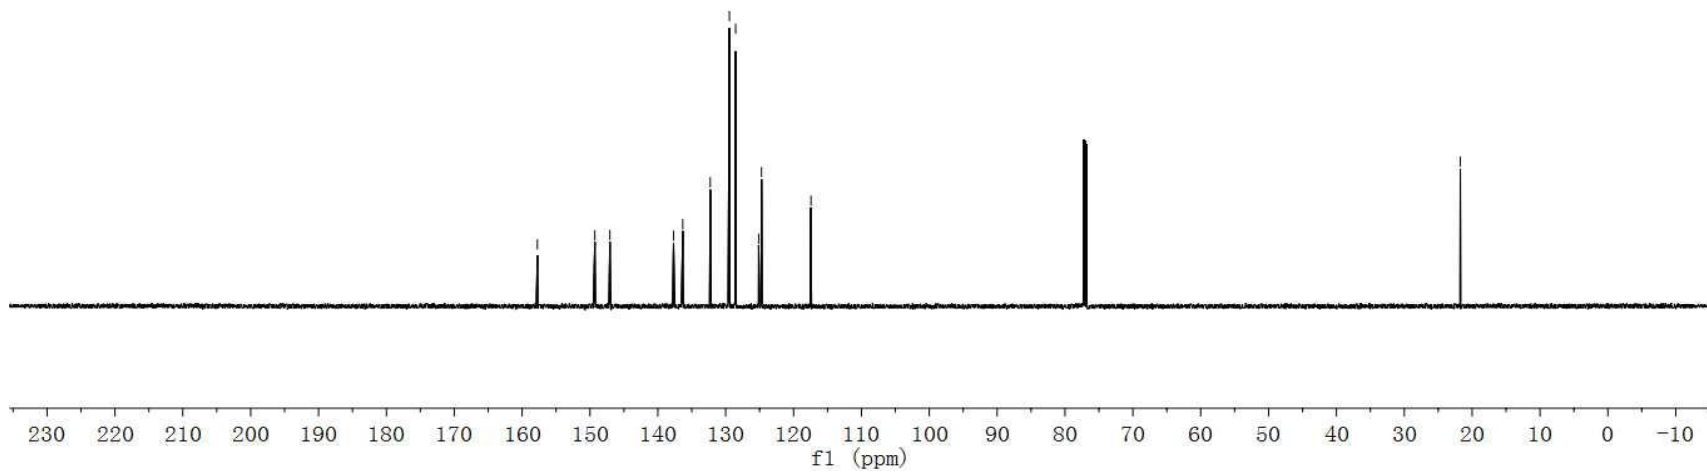

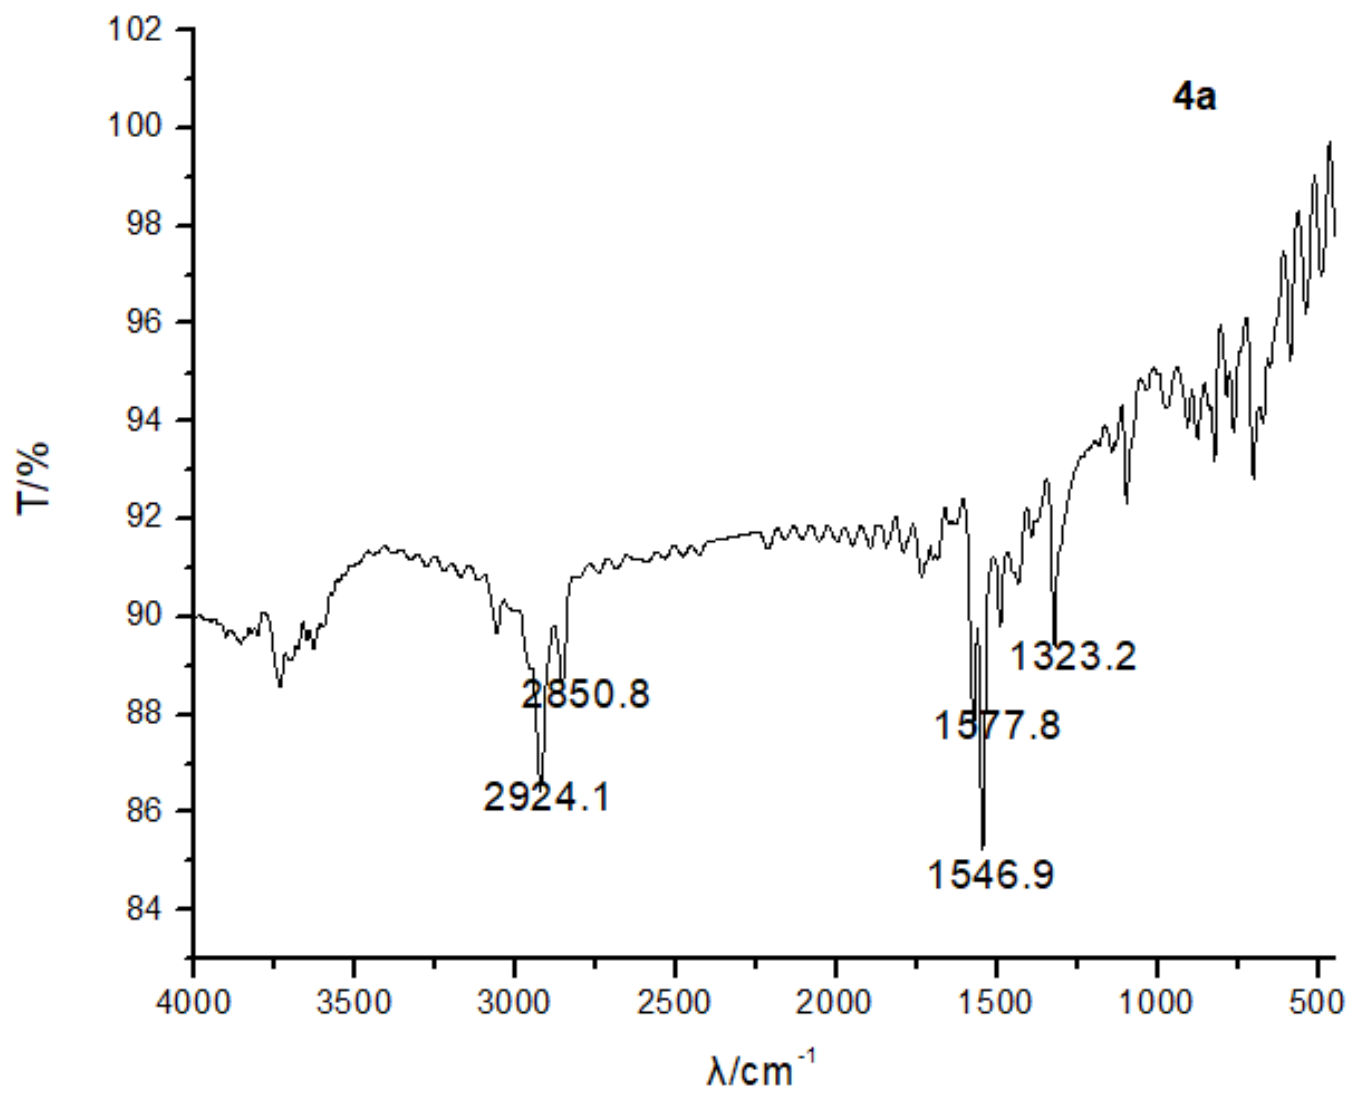

**<sup>1</sup>H and <sup>13</sup>C Spectra of compound 4b (CDCl<sub>3</sub>)**

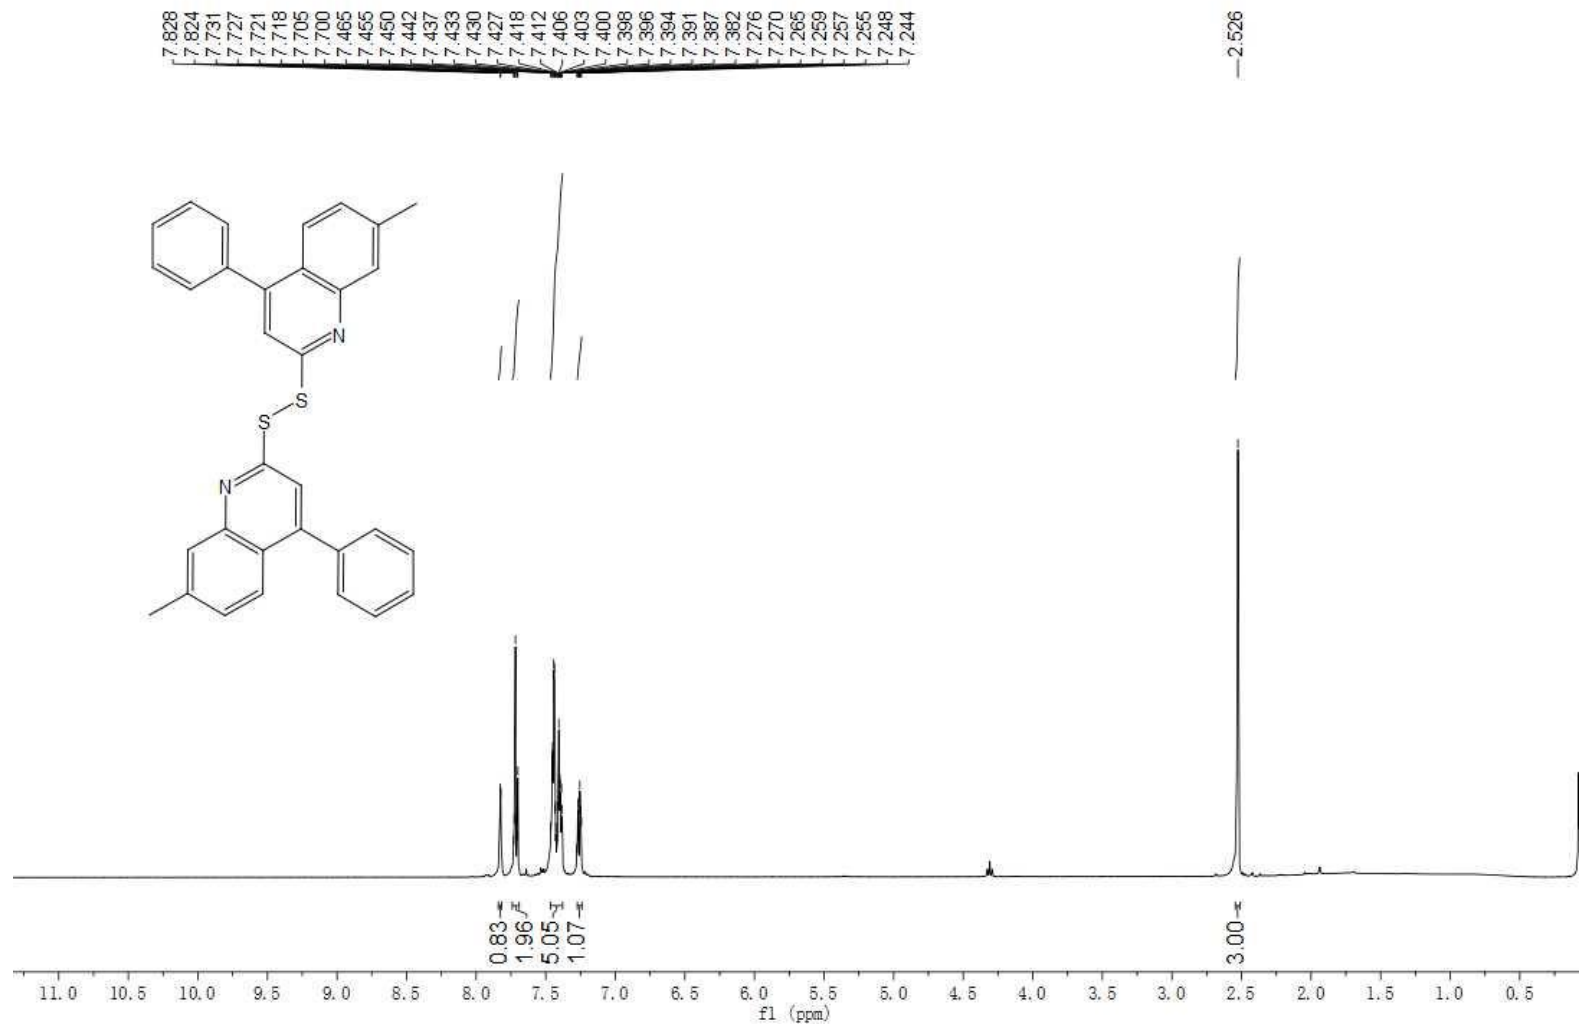



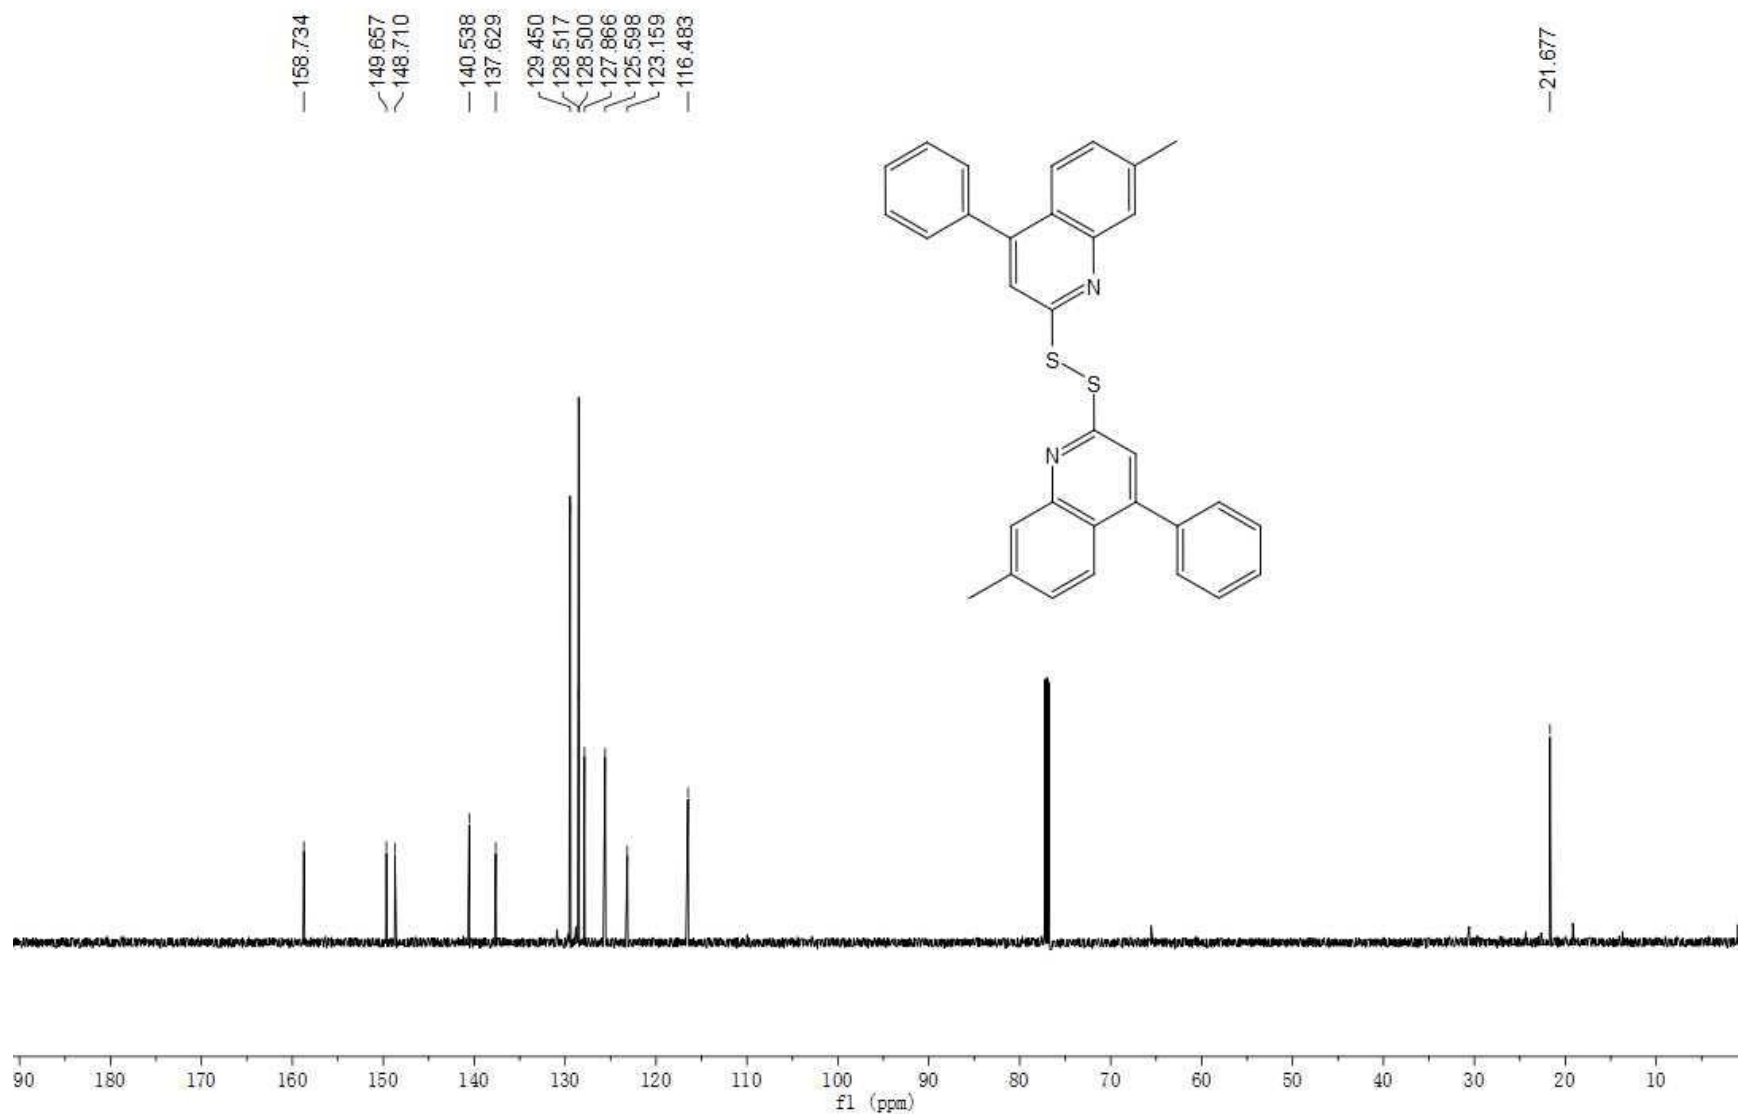

# <sup>1</sup>H and <sup>13</sup>C Spectra of compound 4c (CDCl<sub>3</sub>)

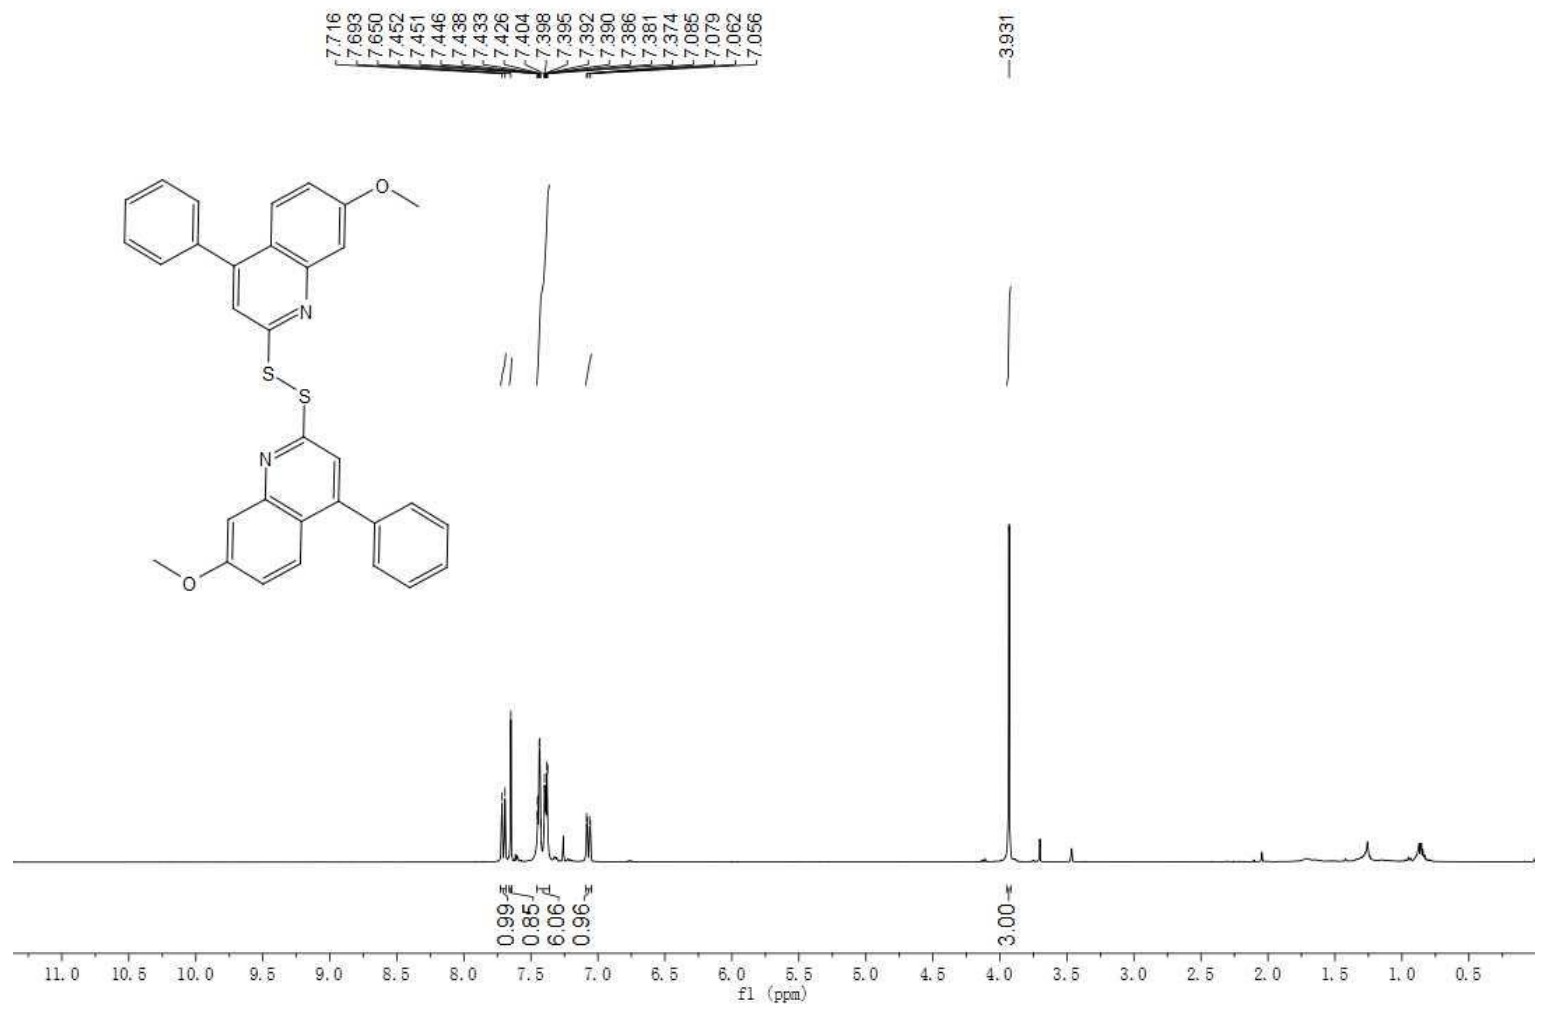

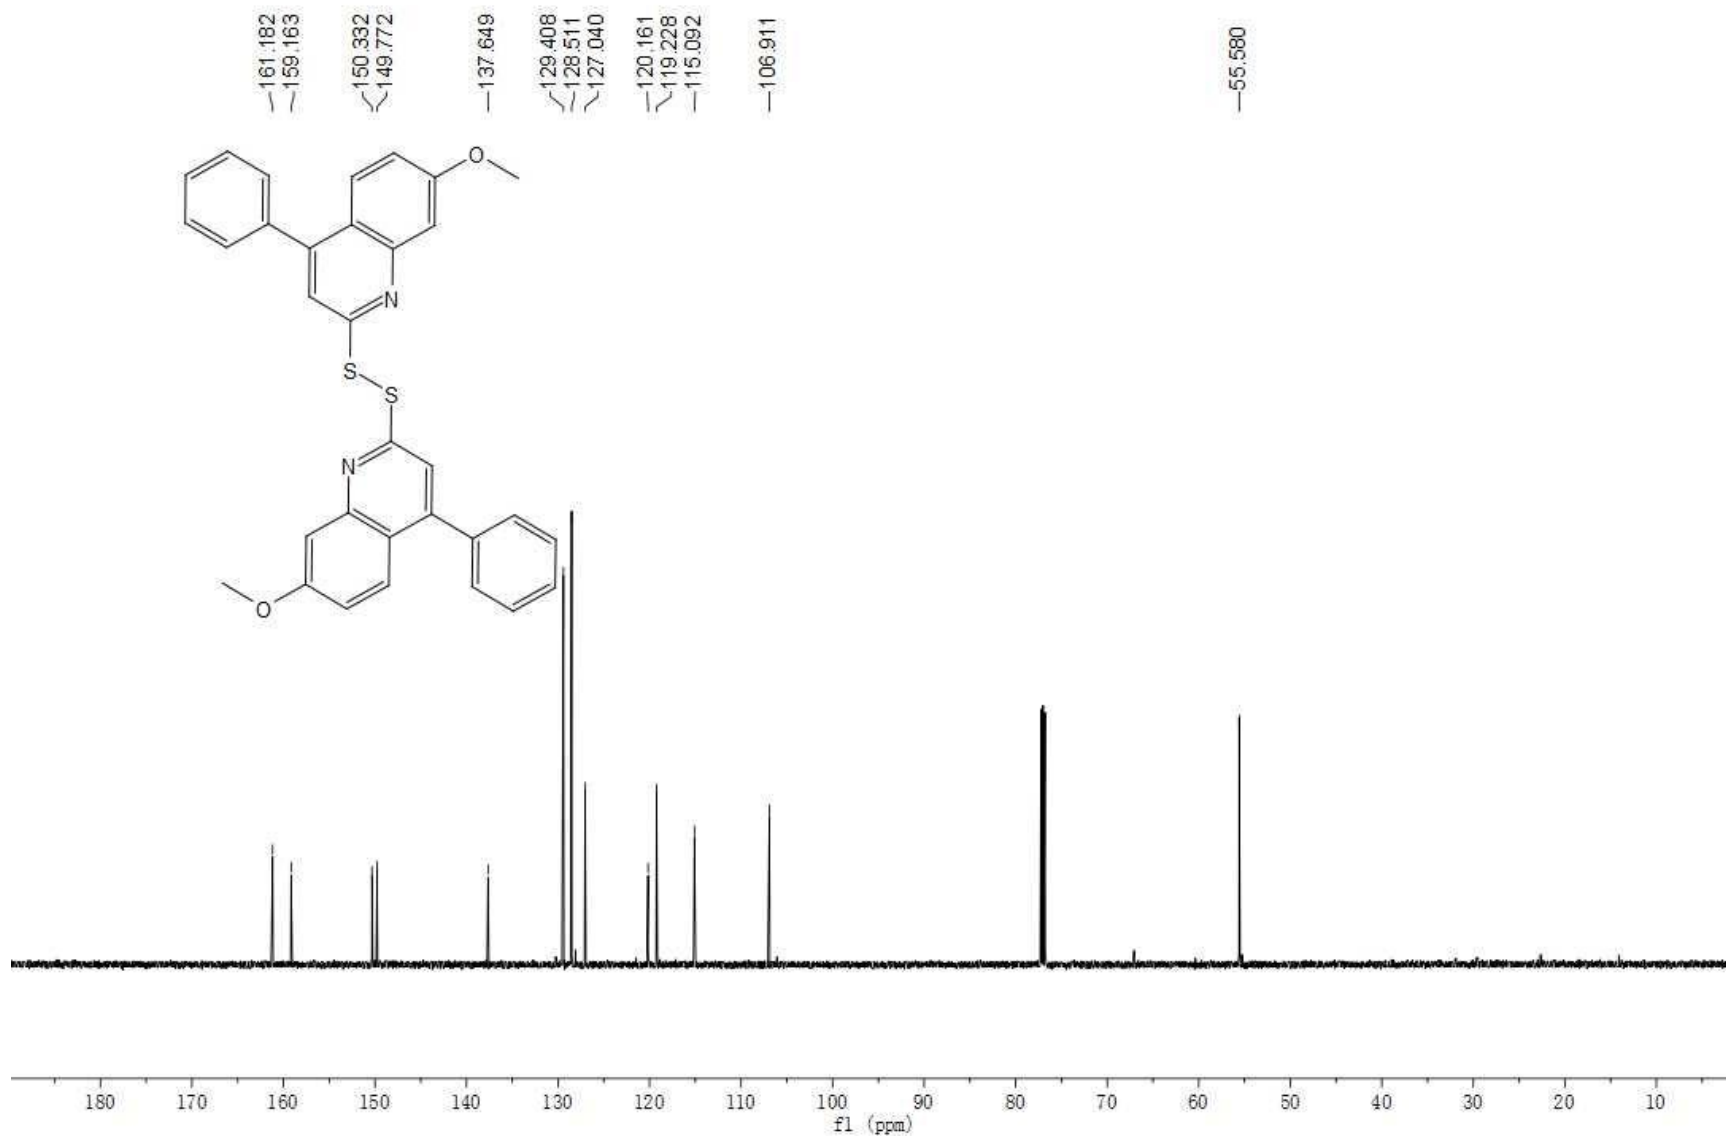

**<sup>1</sup>H and <sup>13</sup>C Spectra of compound 4d (CDCl<sub>3</sub>)**

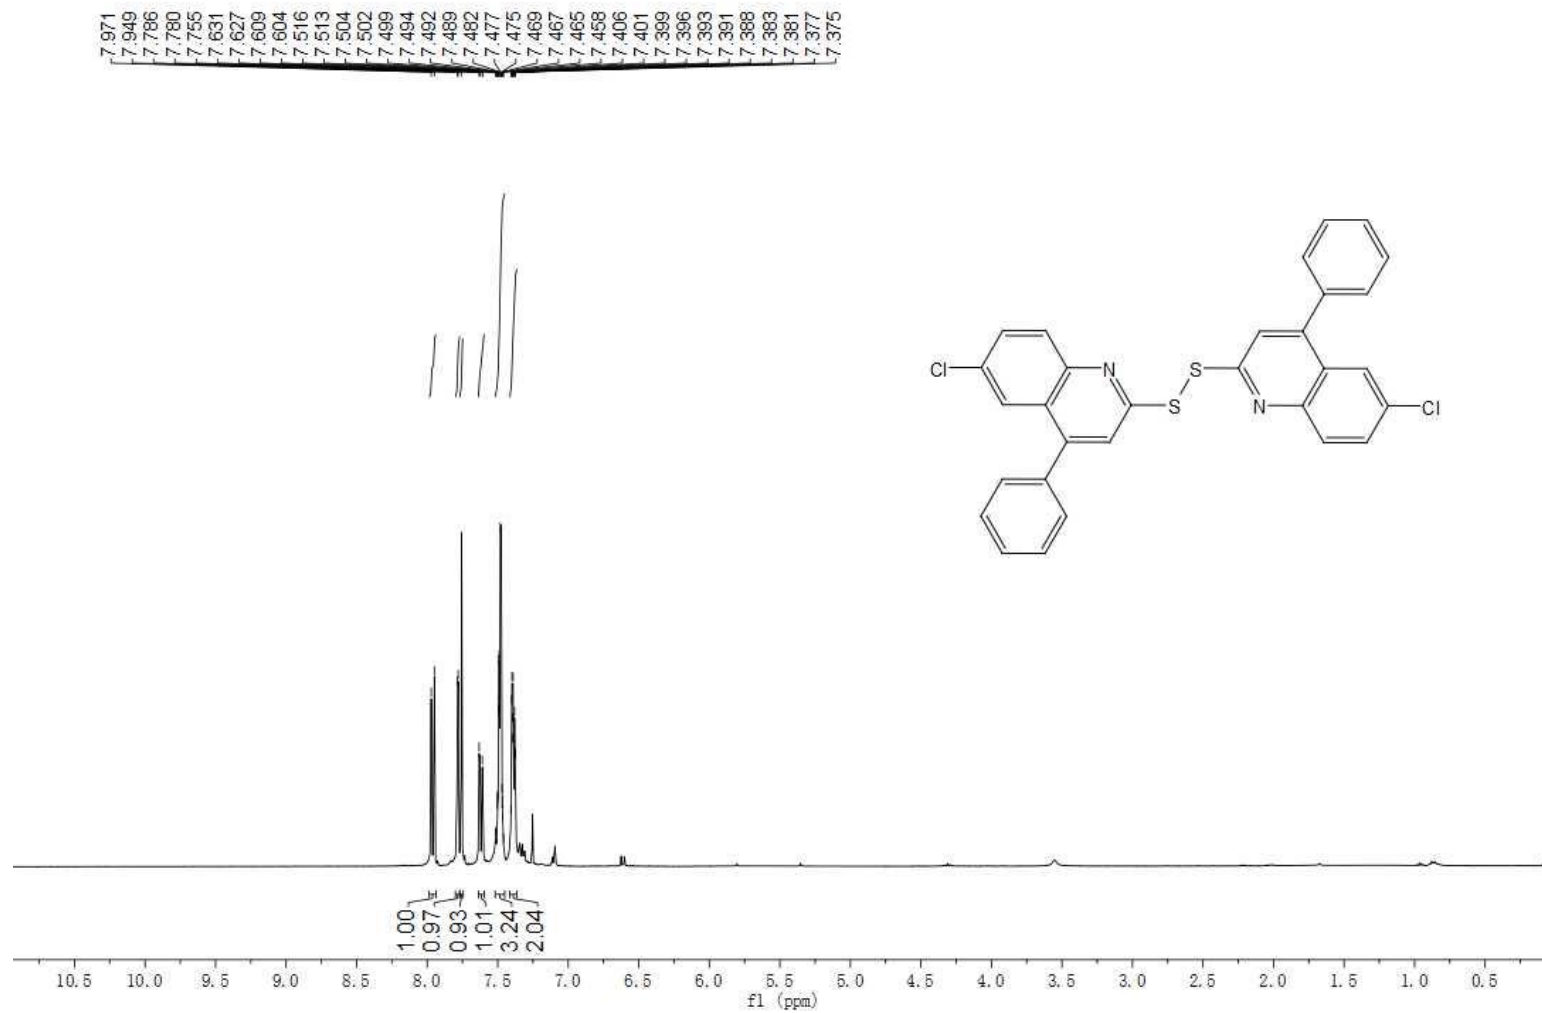

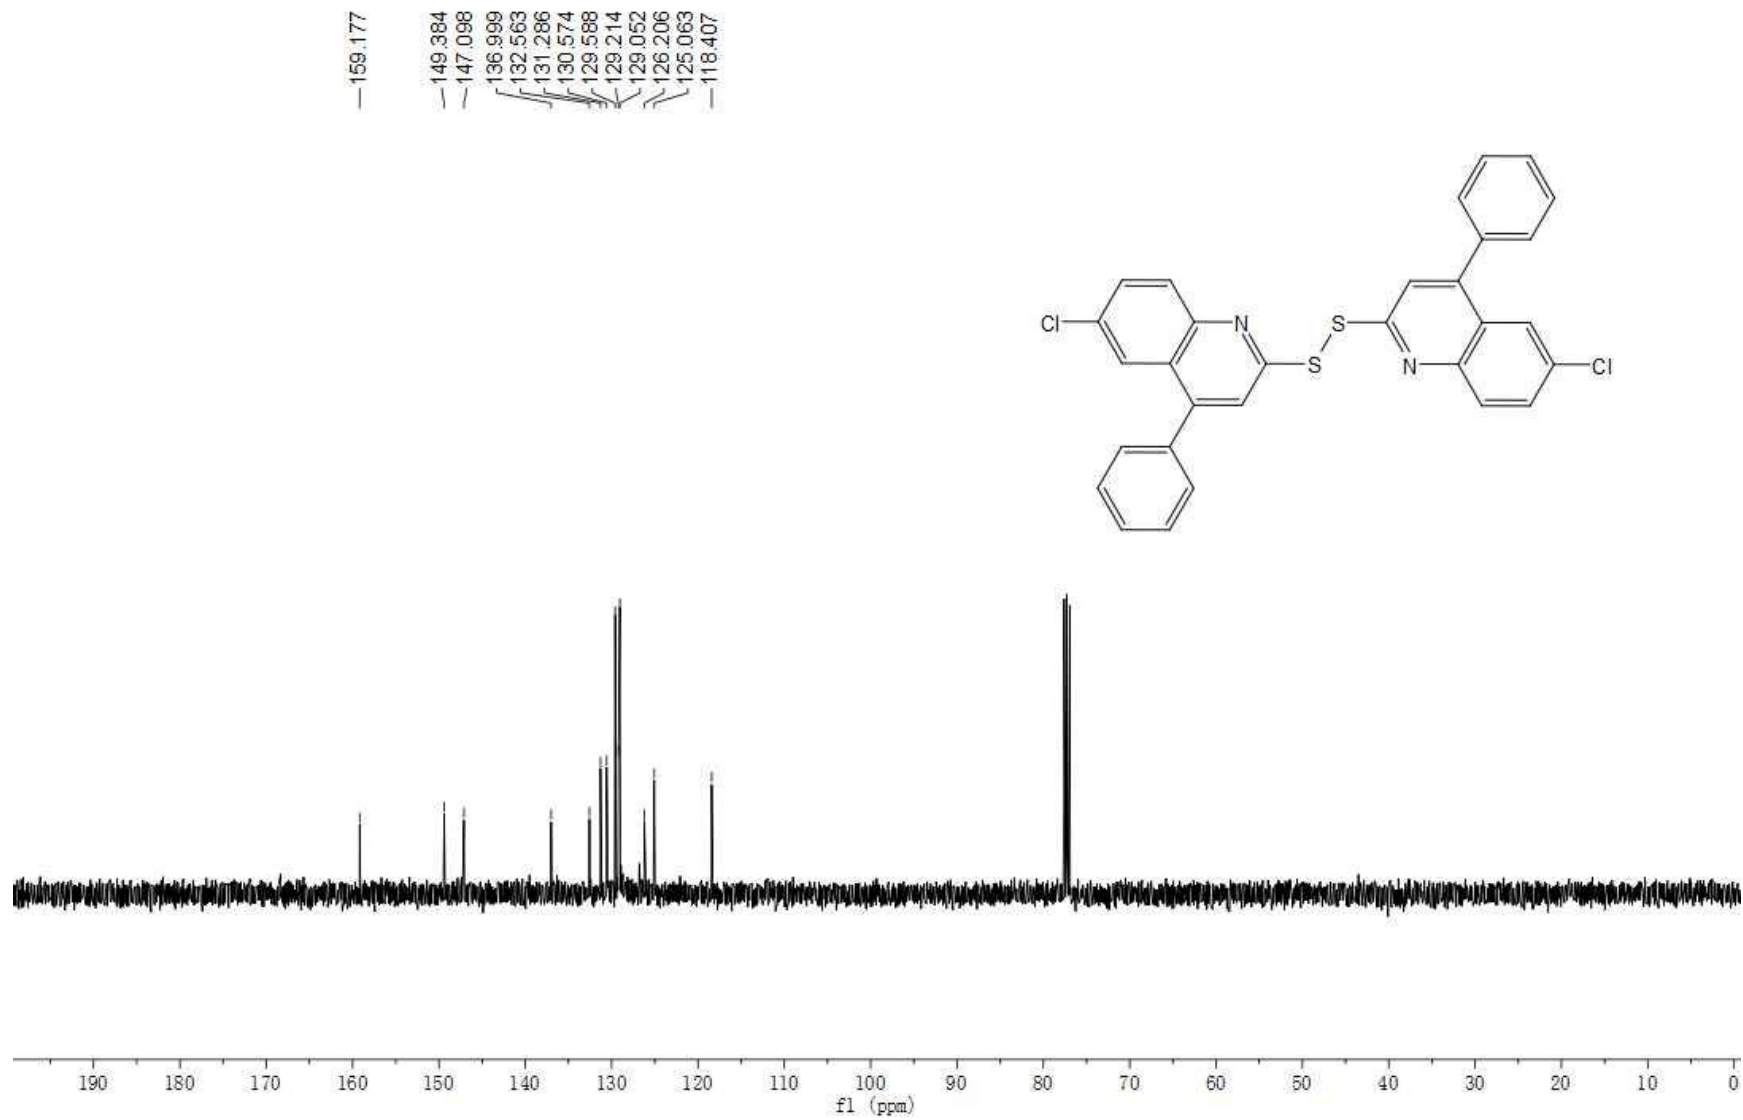

**<sup>1</sup>H and <sup>13</sup>C Spectra of compound 4e (CDCl<sub>3</sub>)**

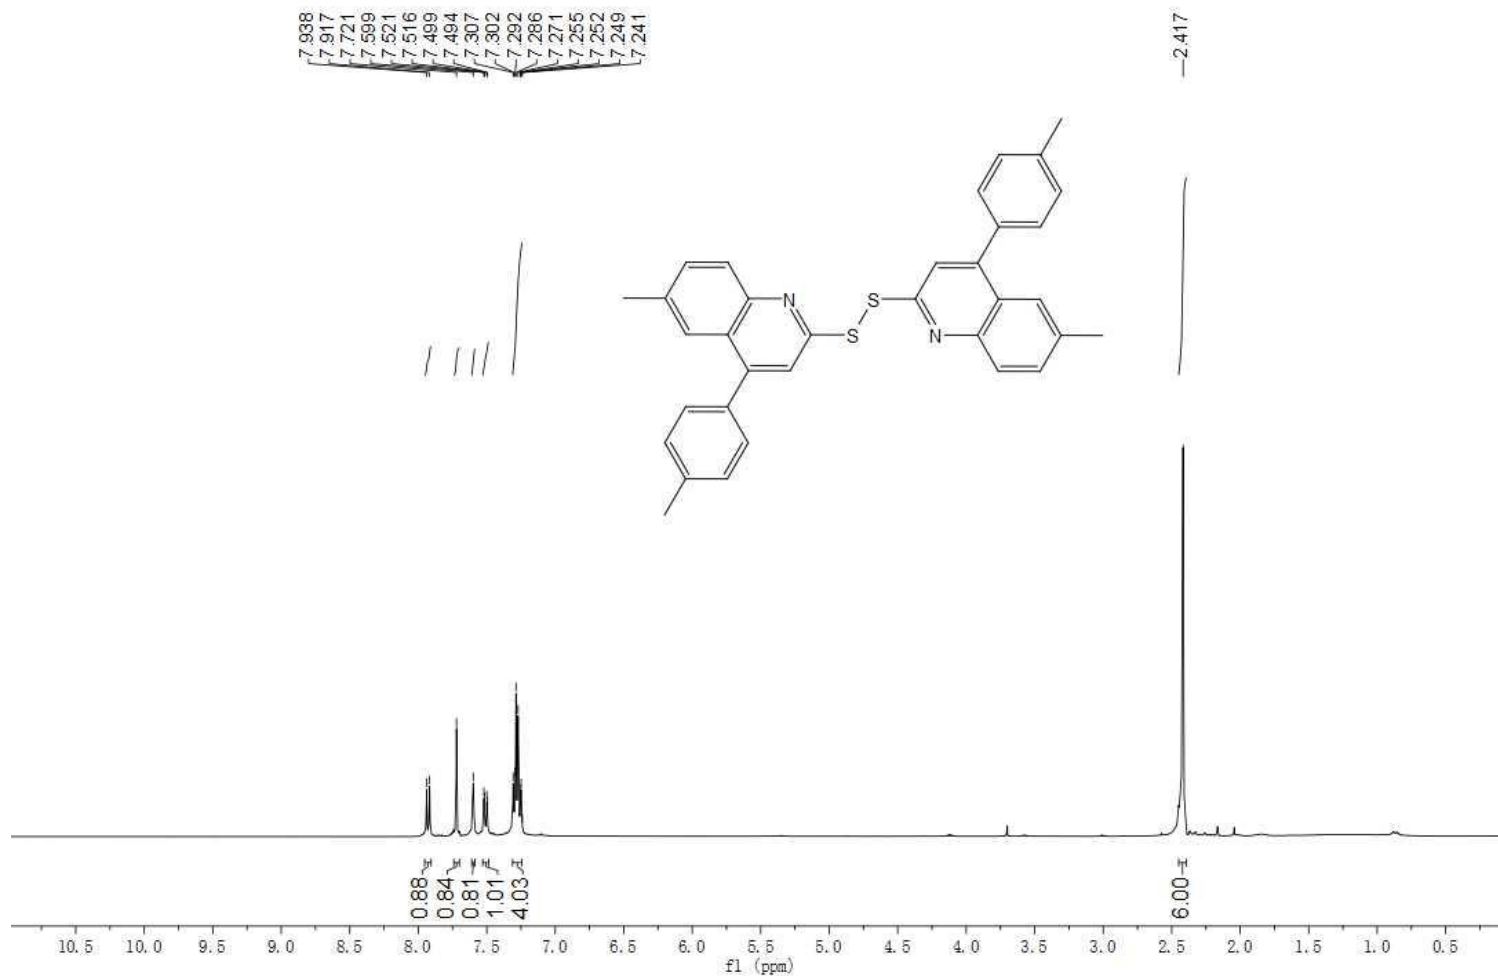

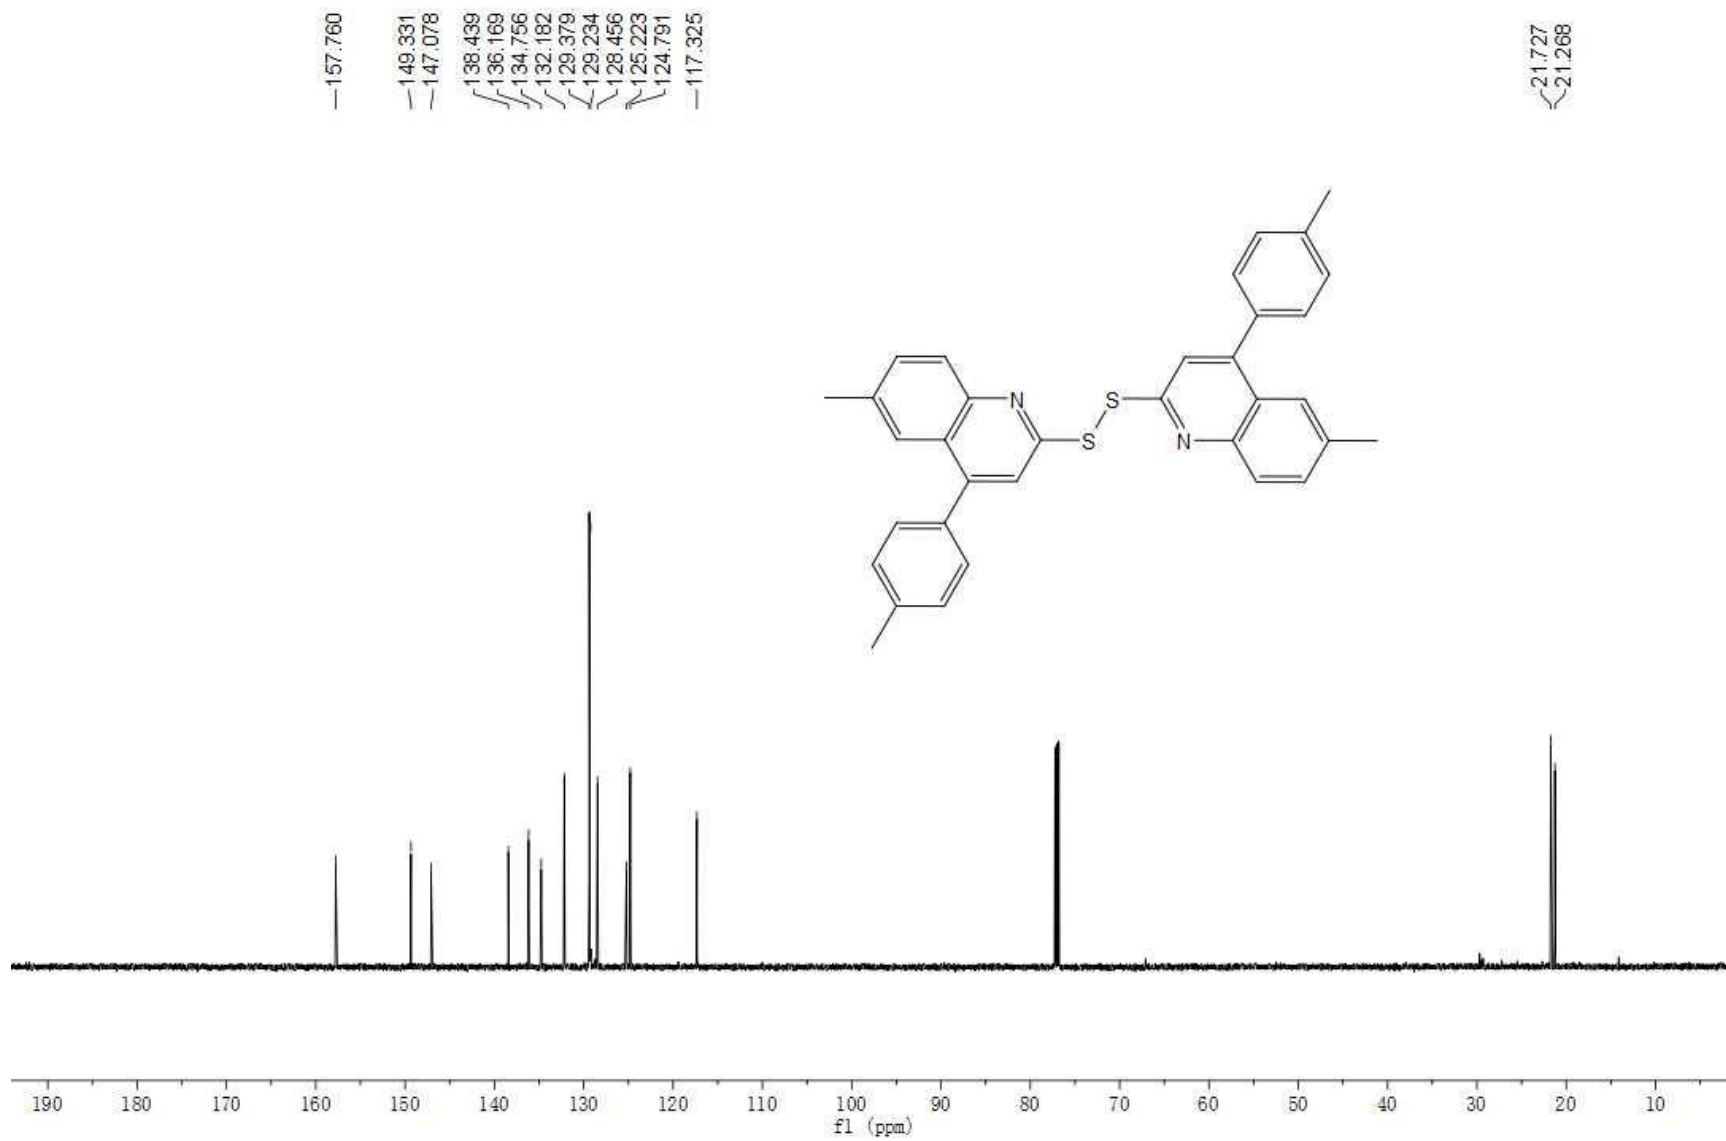

**<sup>1</sup>H and <sup>13</sup>C Spectra of compound 4f (CDCl<sub>3</sub>)**

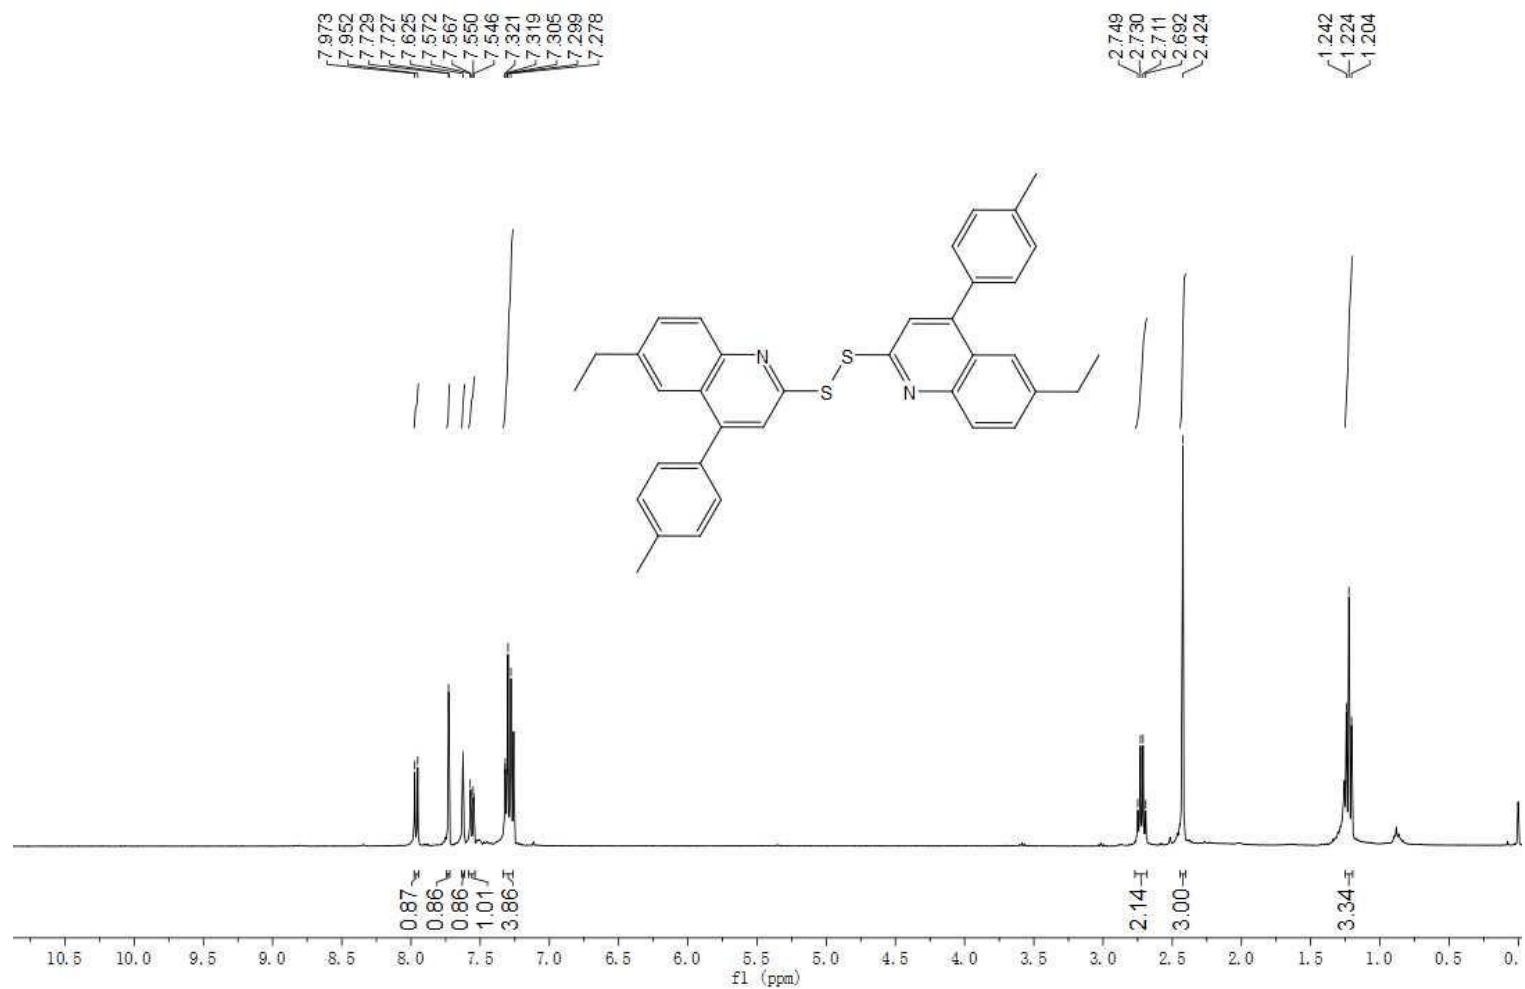



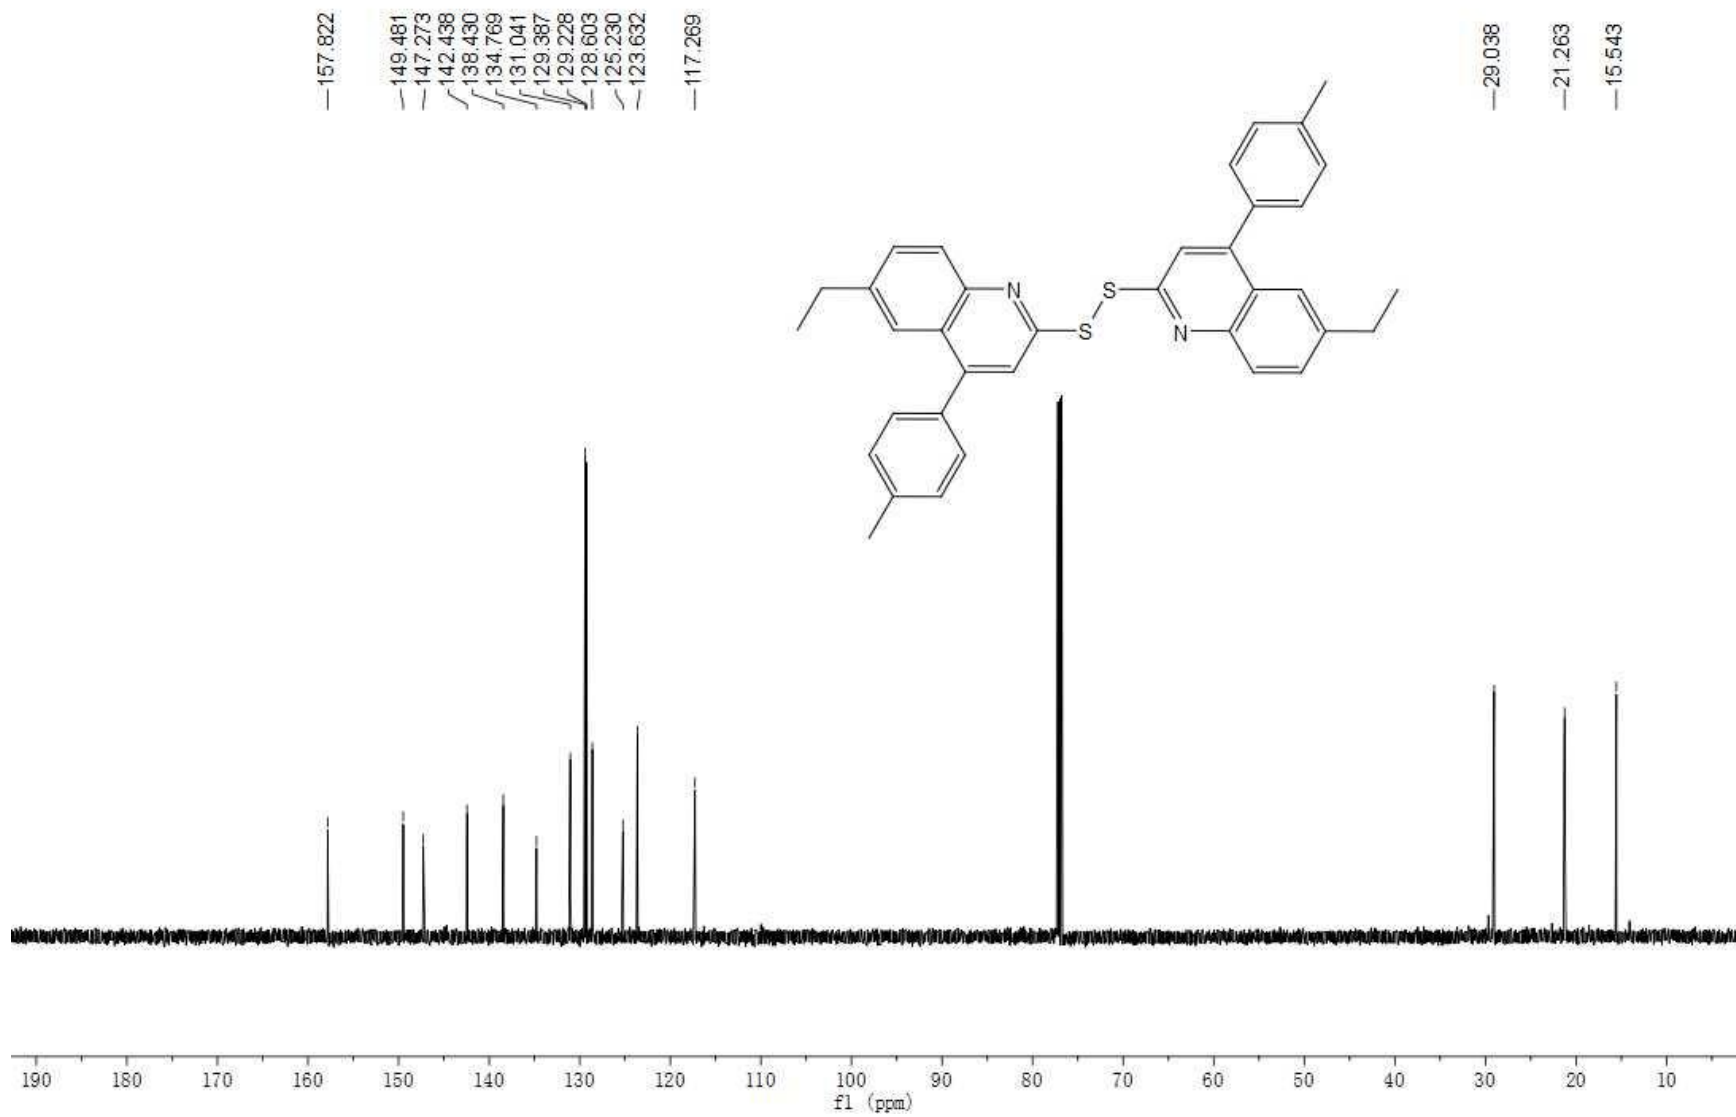

**<sup>1</sup>H and <sup>13</sup>C Spectra of compound 4g (CDCl<sub>3</sub>)**

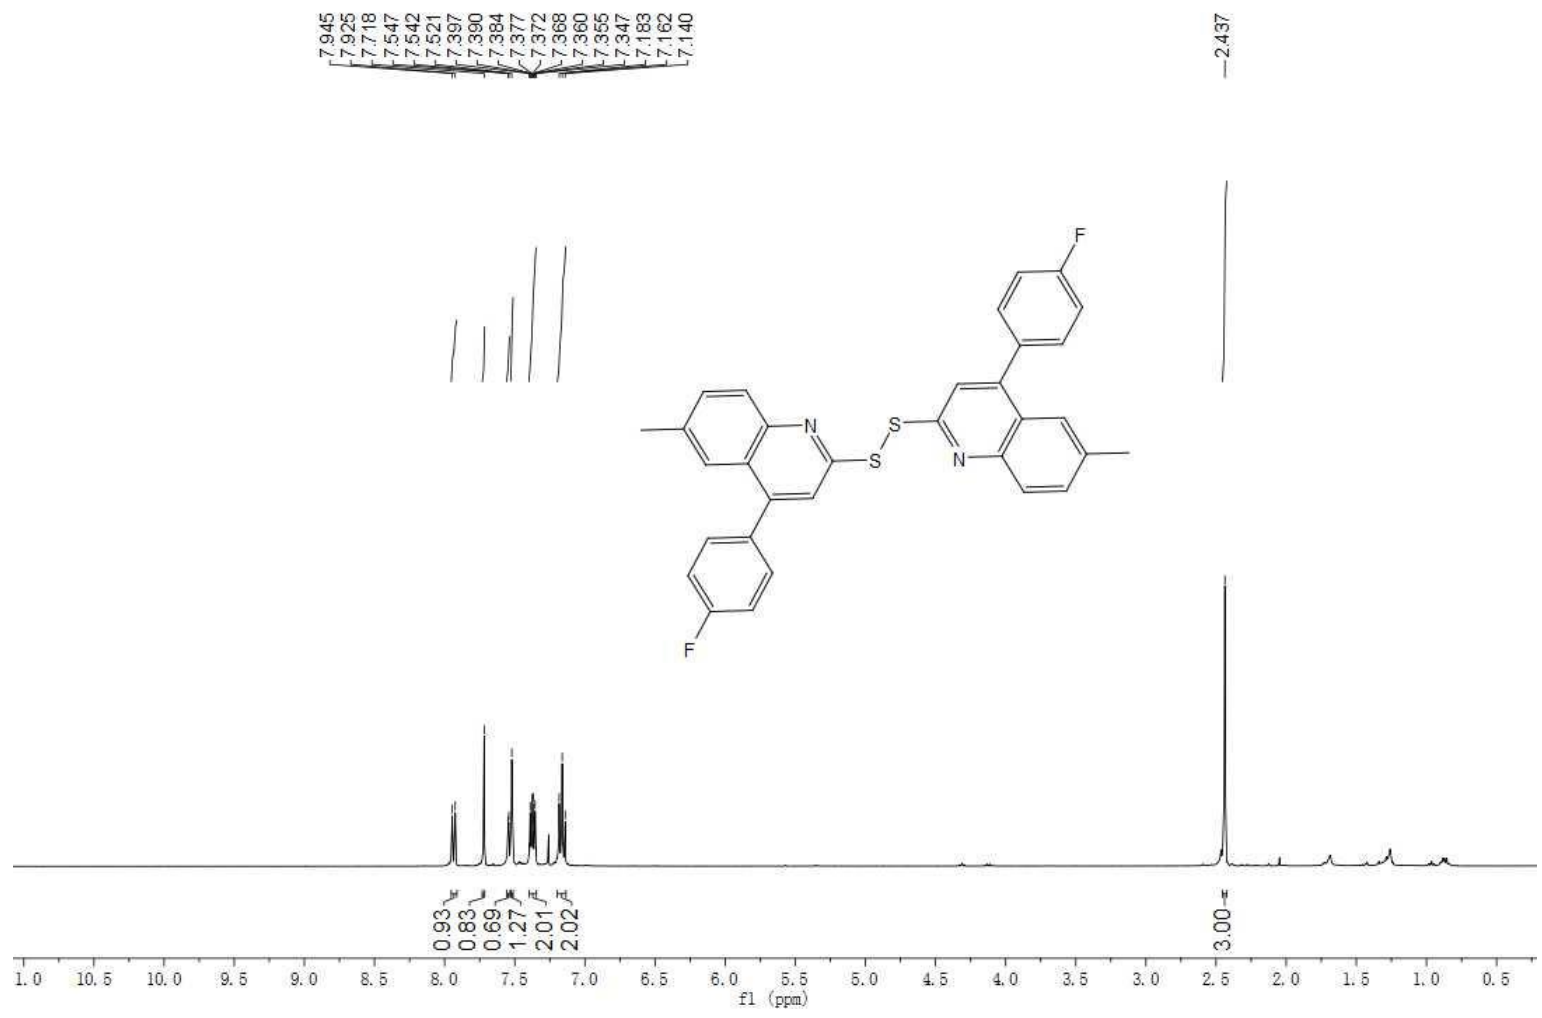

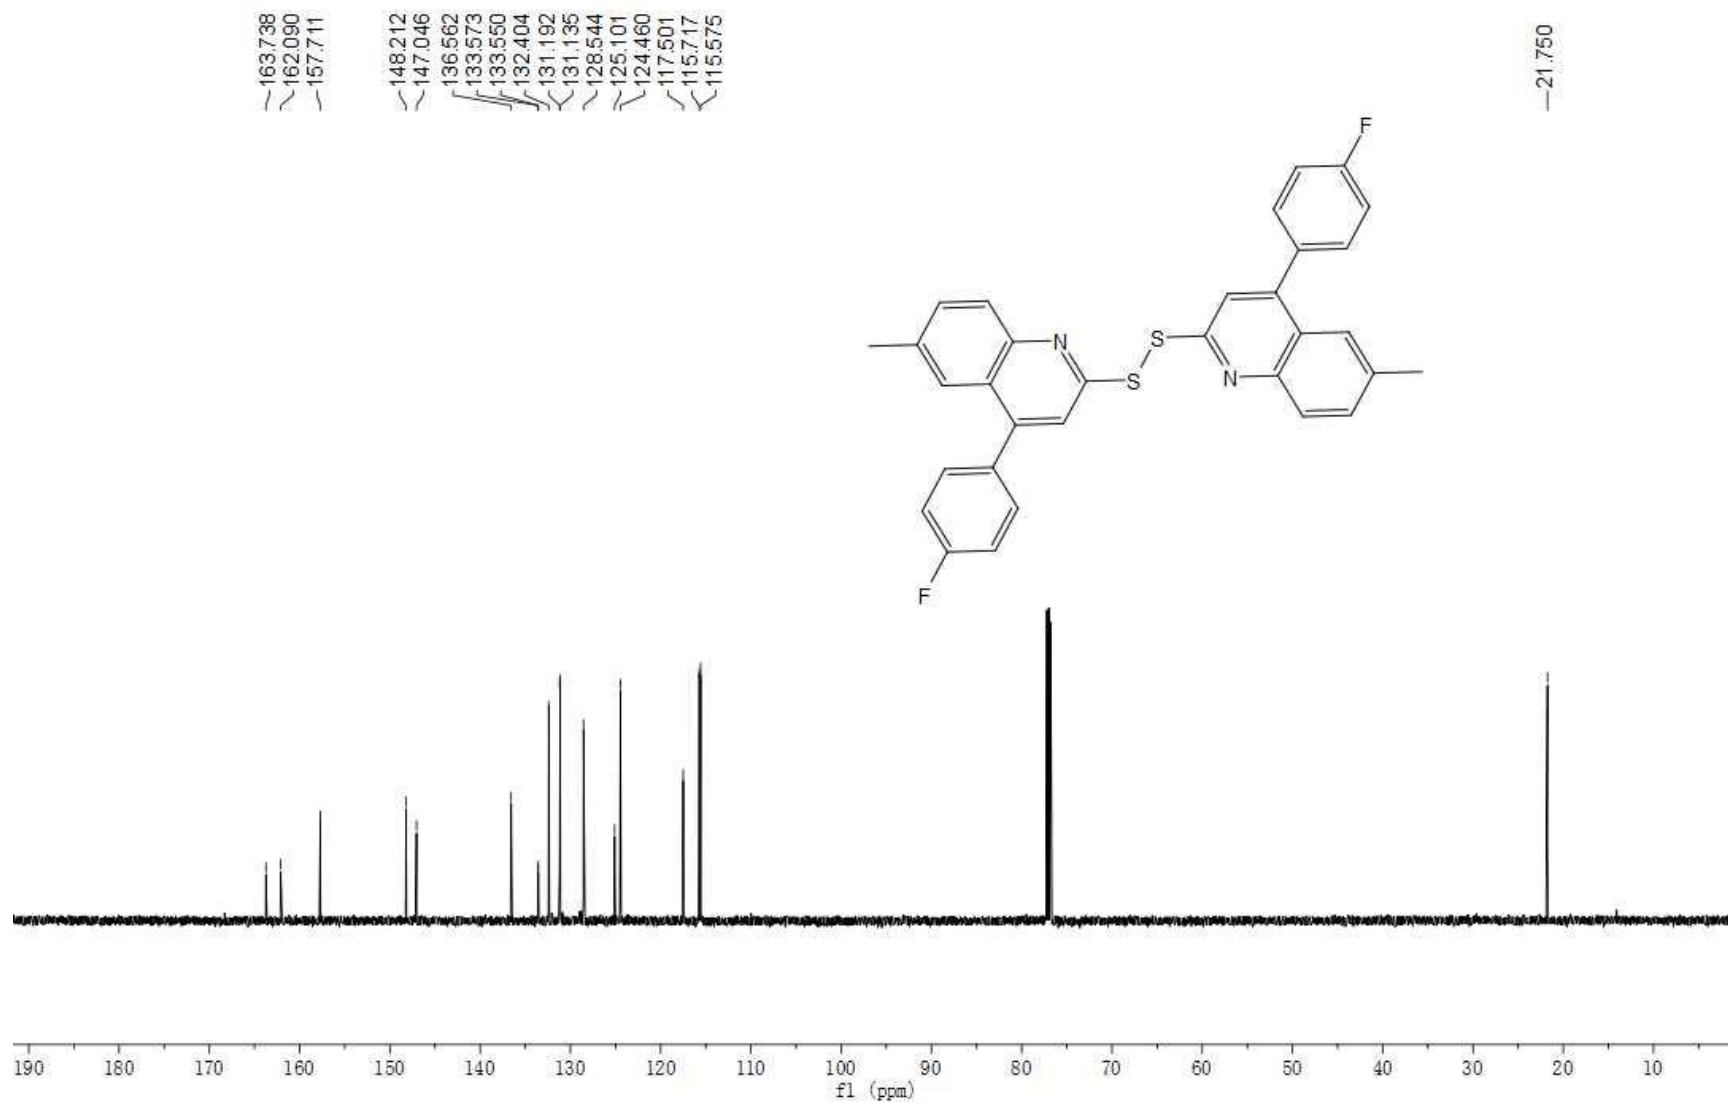

**<sup>1</sup>H and <sup>13</sup>C Spectra of compound 4h (CDCl<sub>3</sub>)**

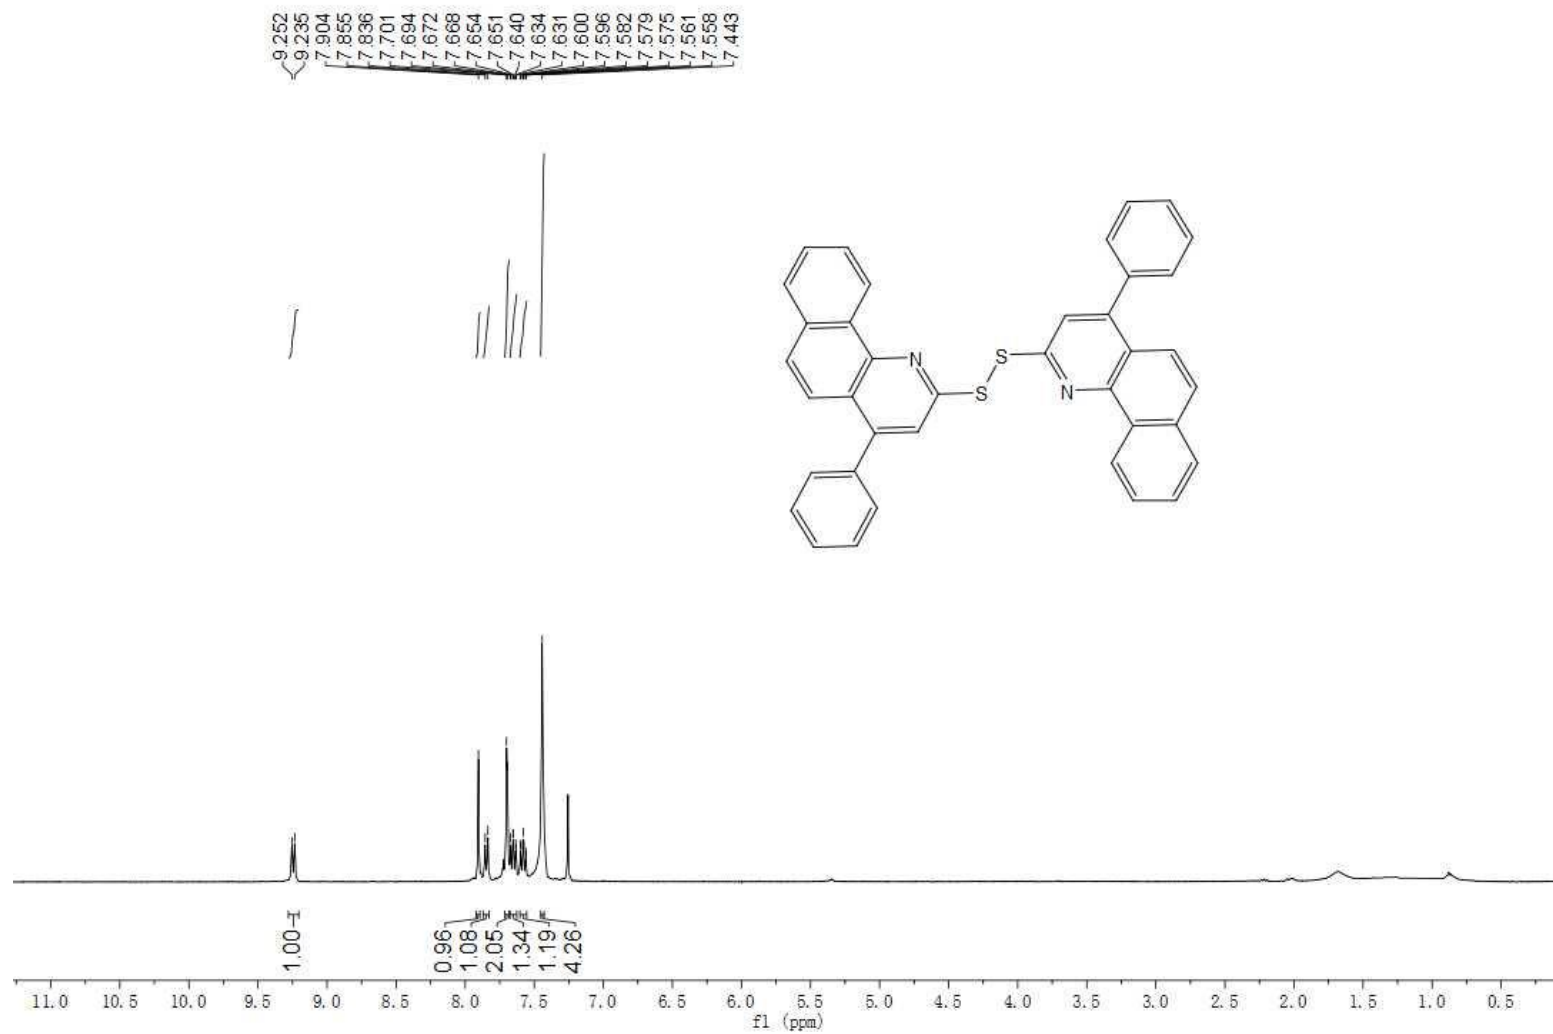

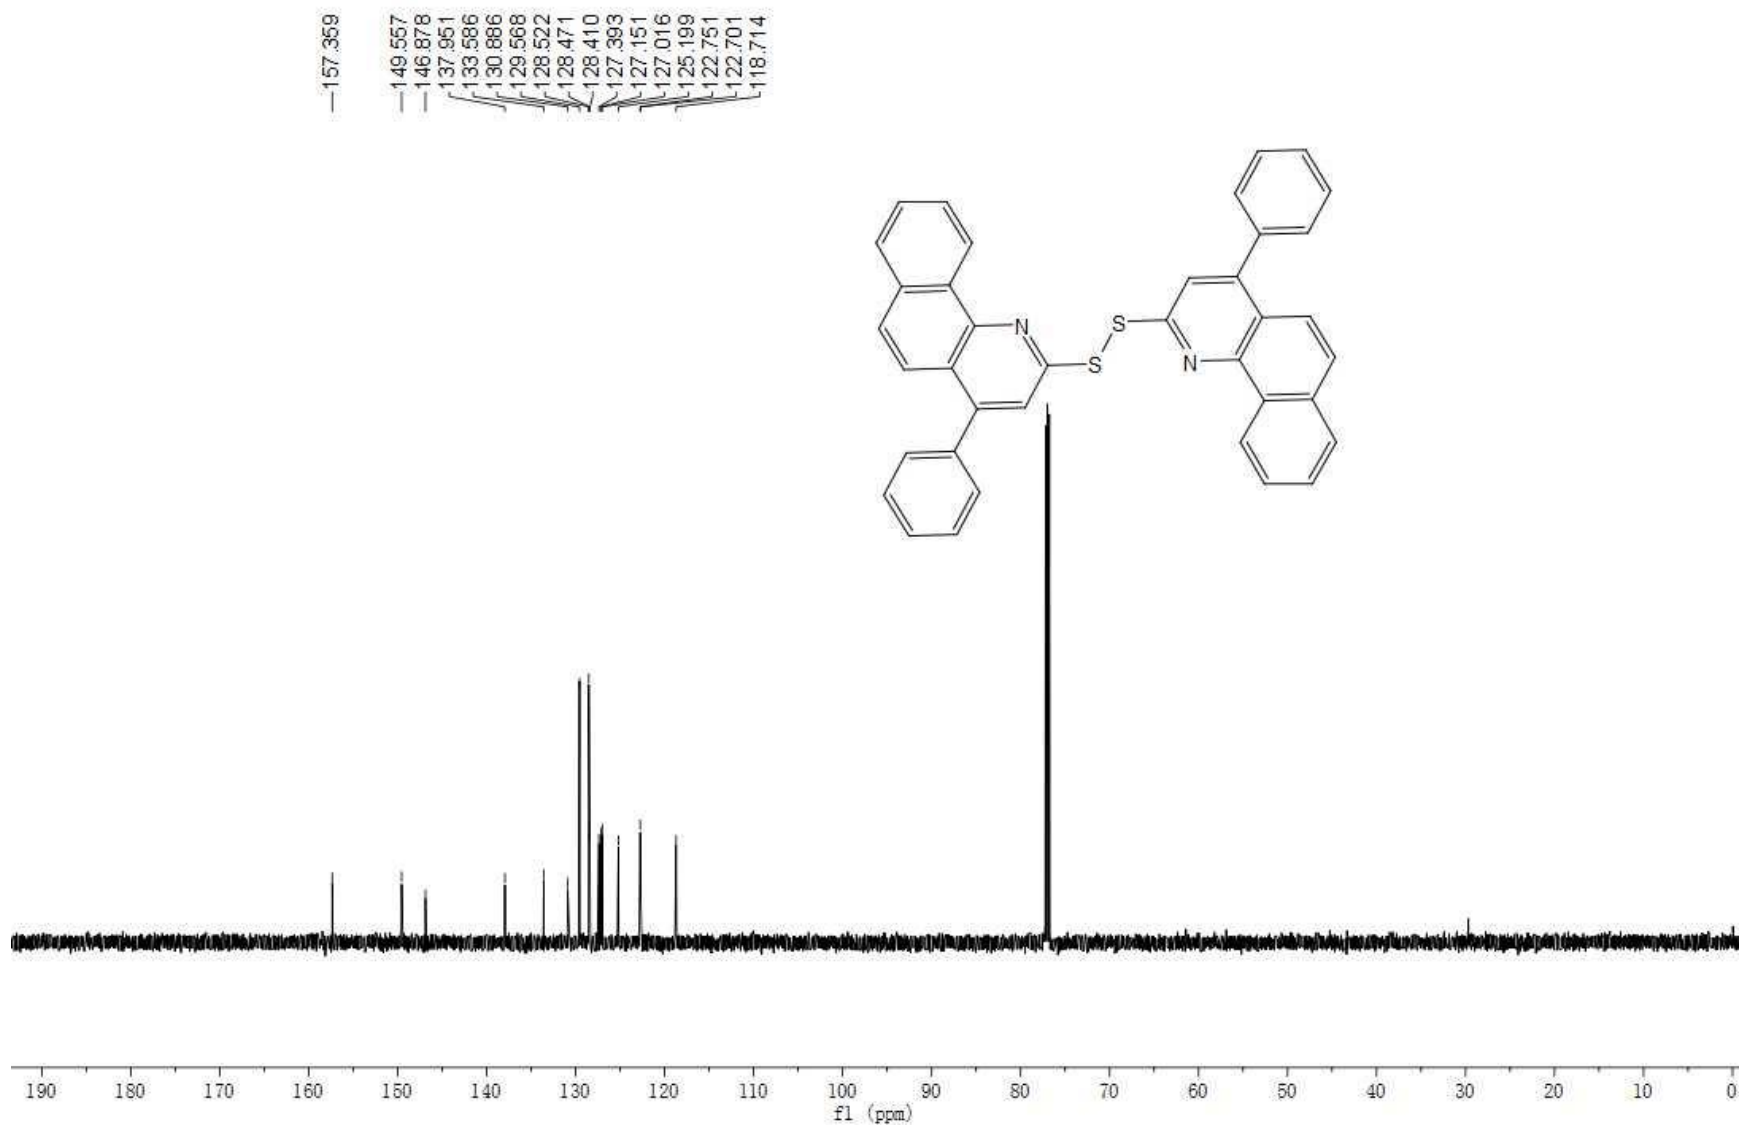

**$^1\text{H}$  and  $^{13}\text{C}$  Spectra of compound 6a ( $\text{CDCl}_3$ )**

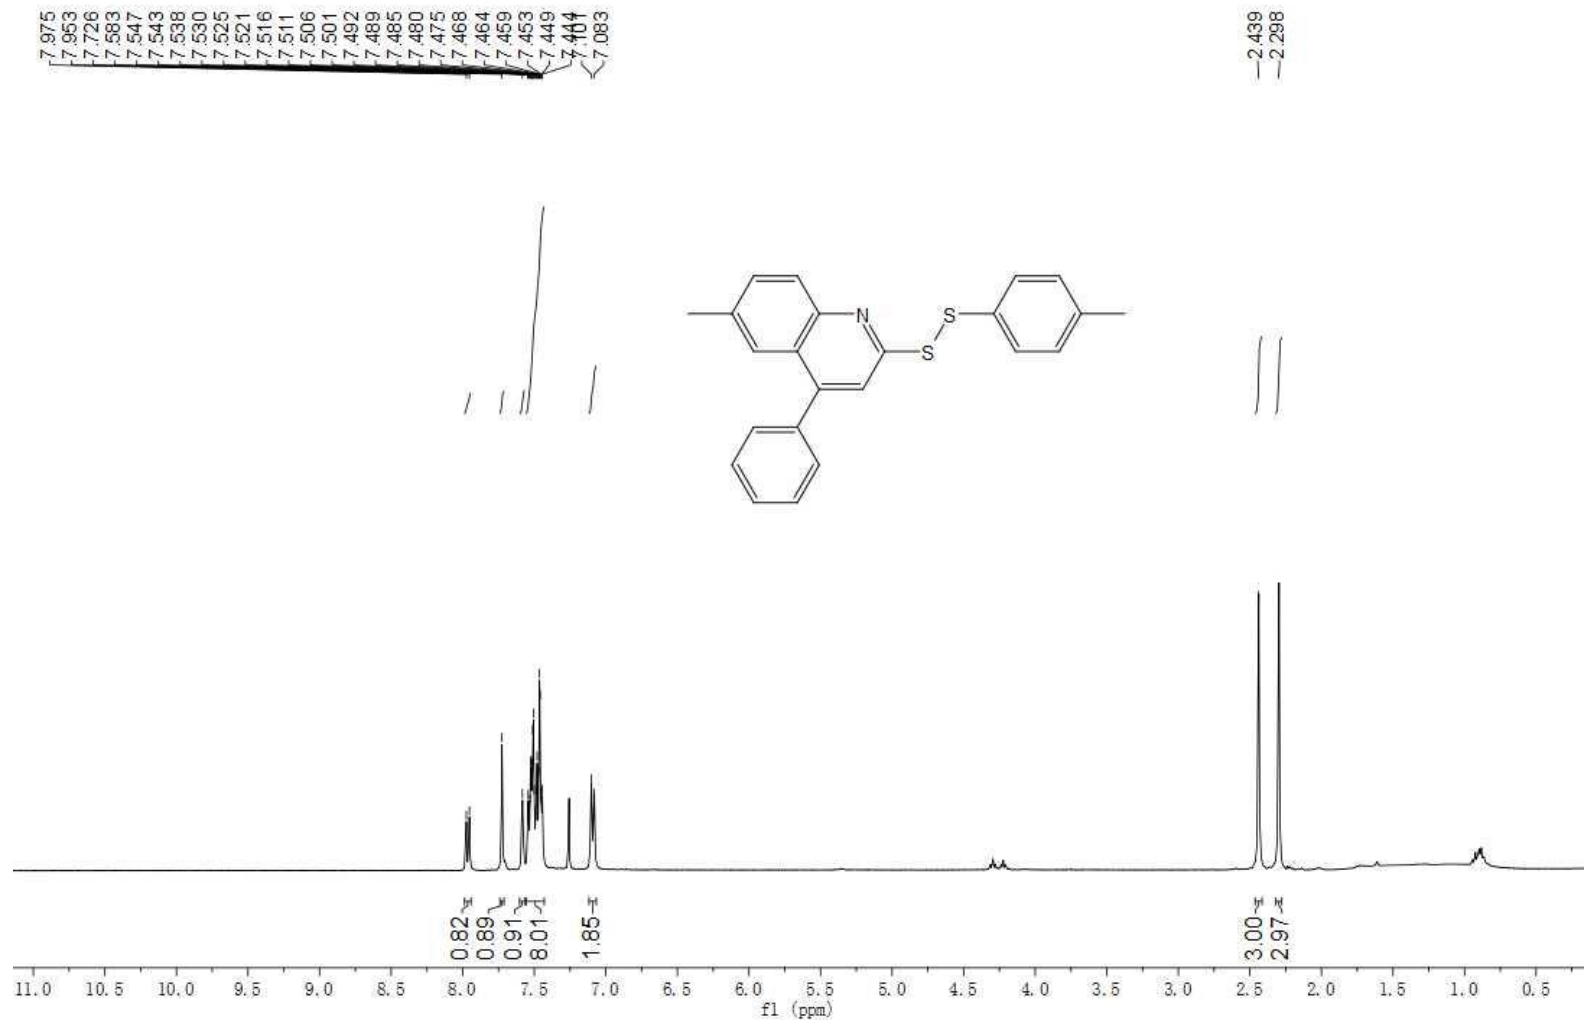

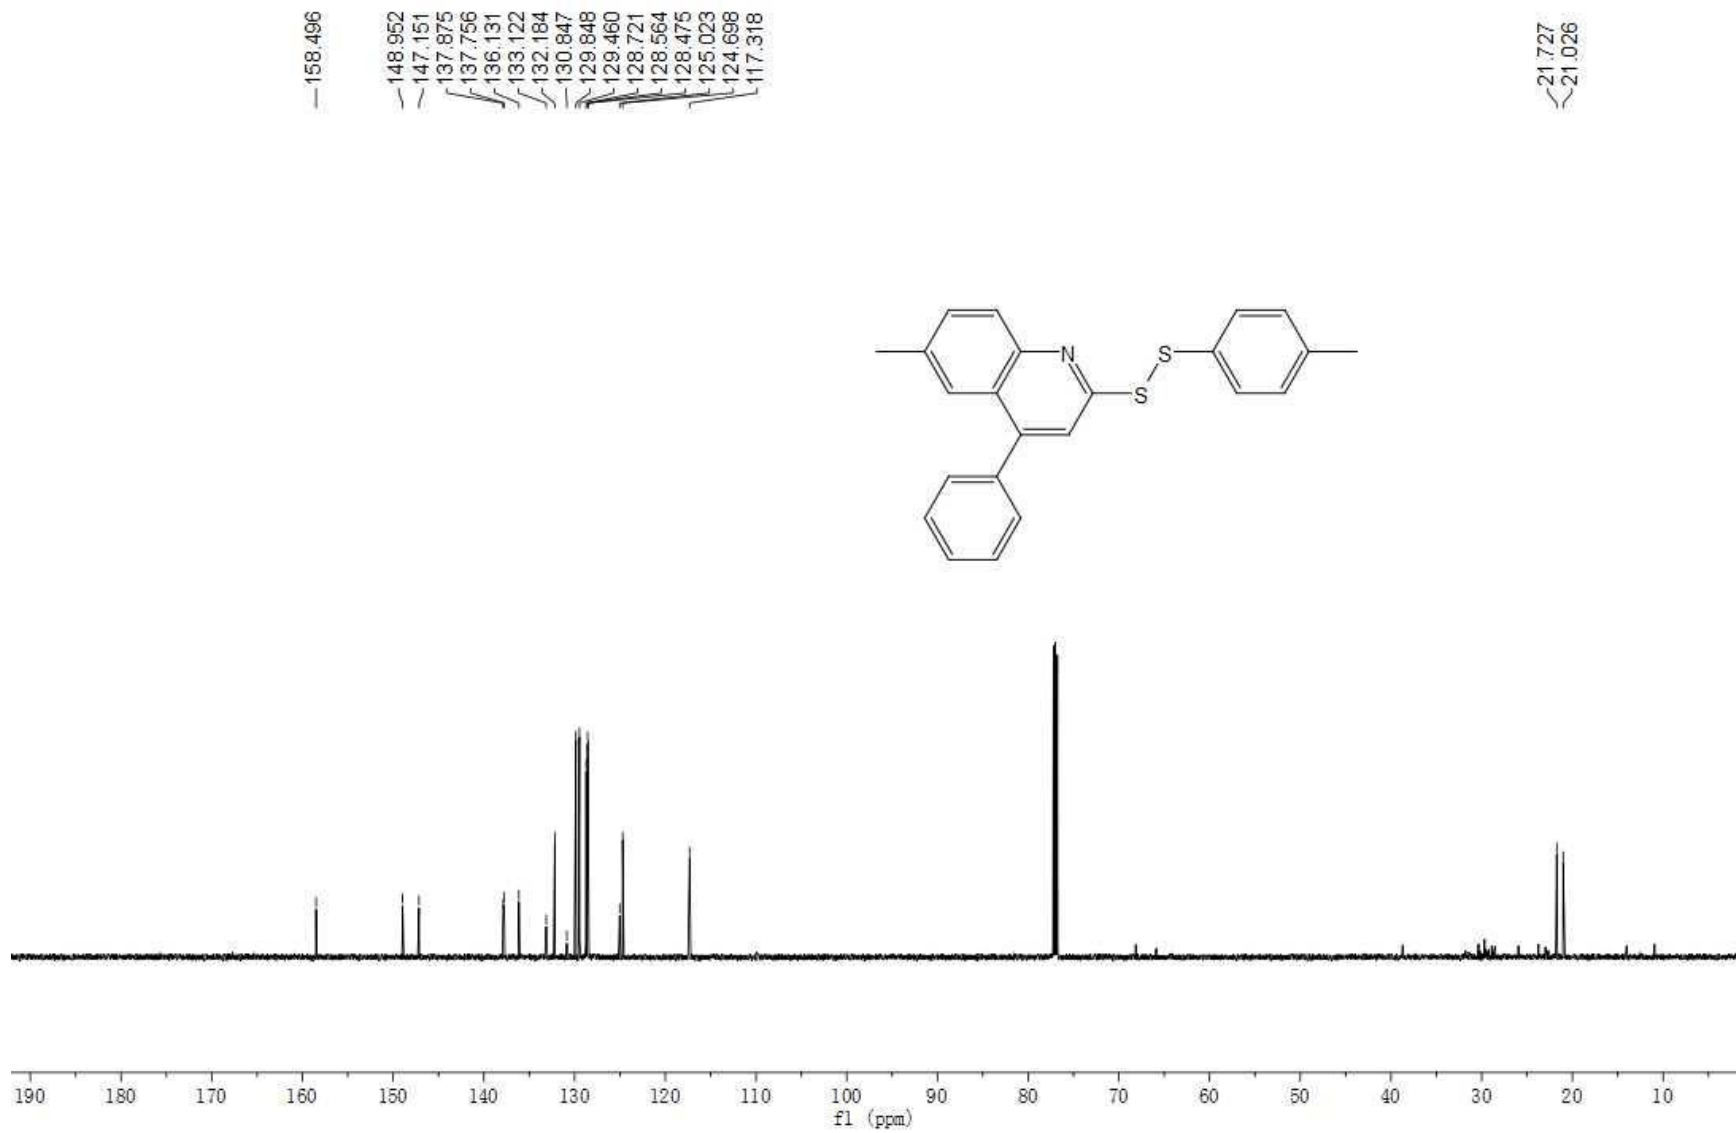

**<sup>1</sup>H and <sup>13</sup>C Spectra of compound 6b (CDCl<sub>3</sub>)**

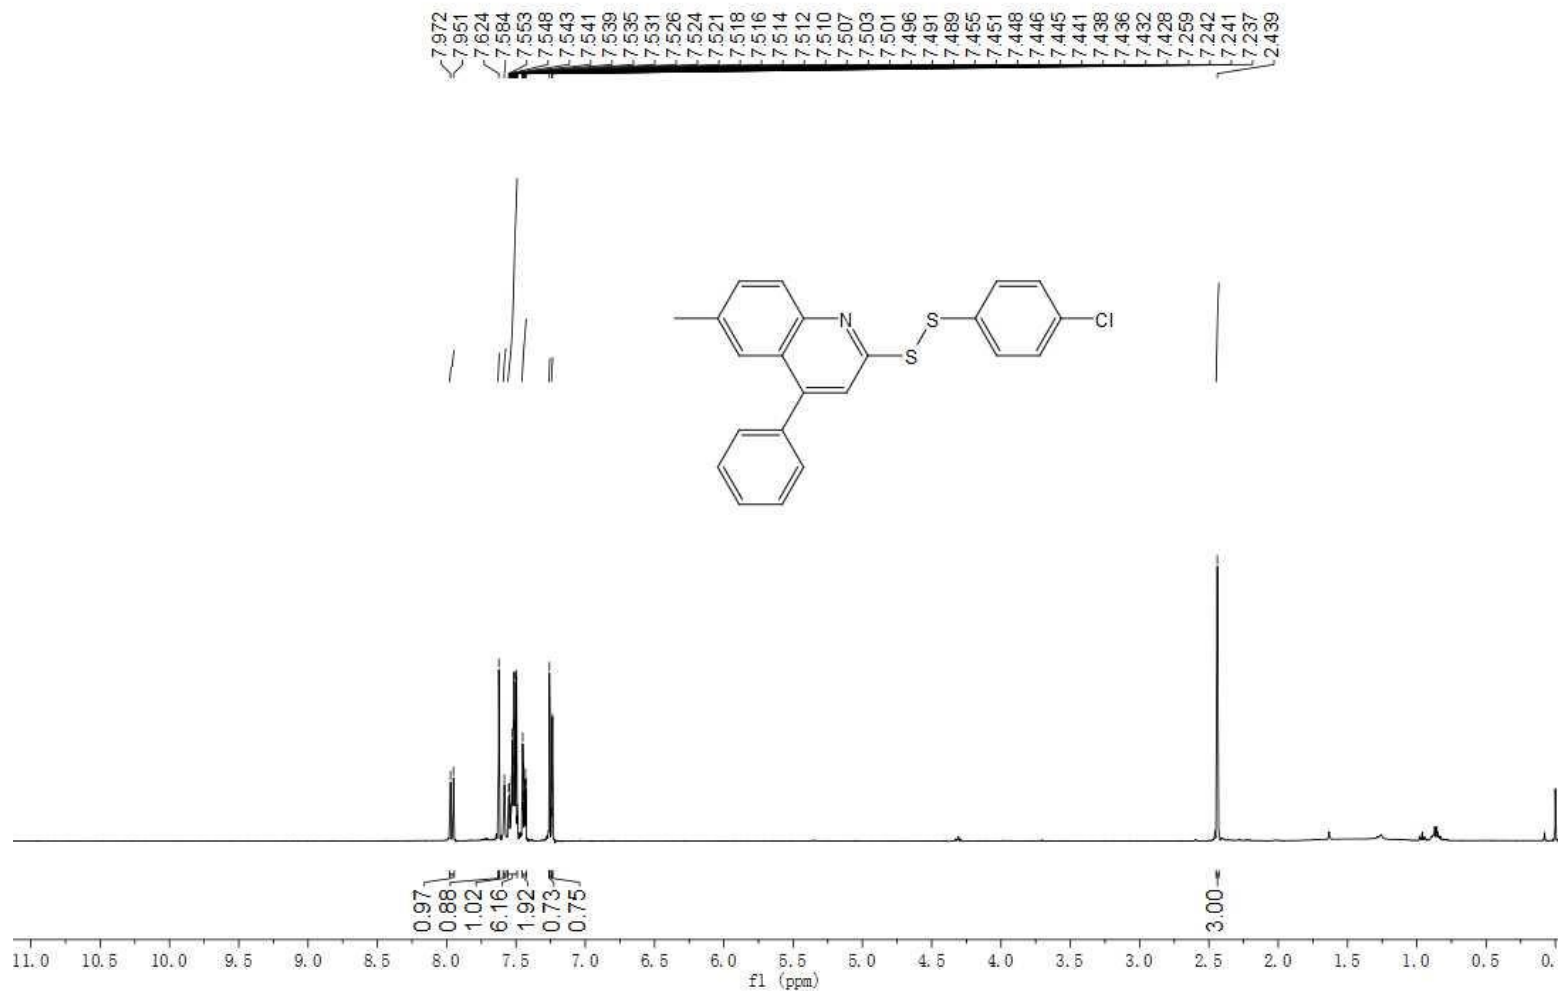



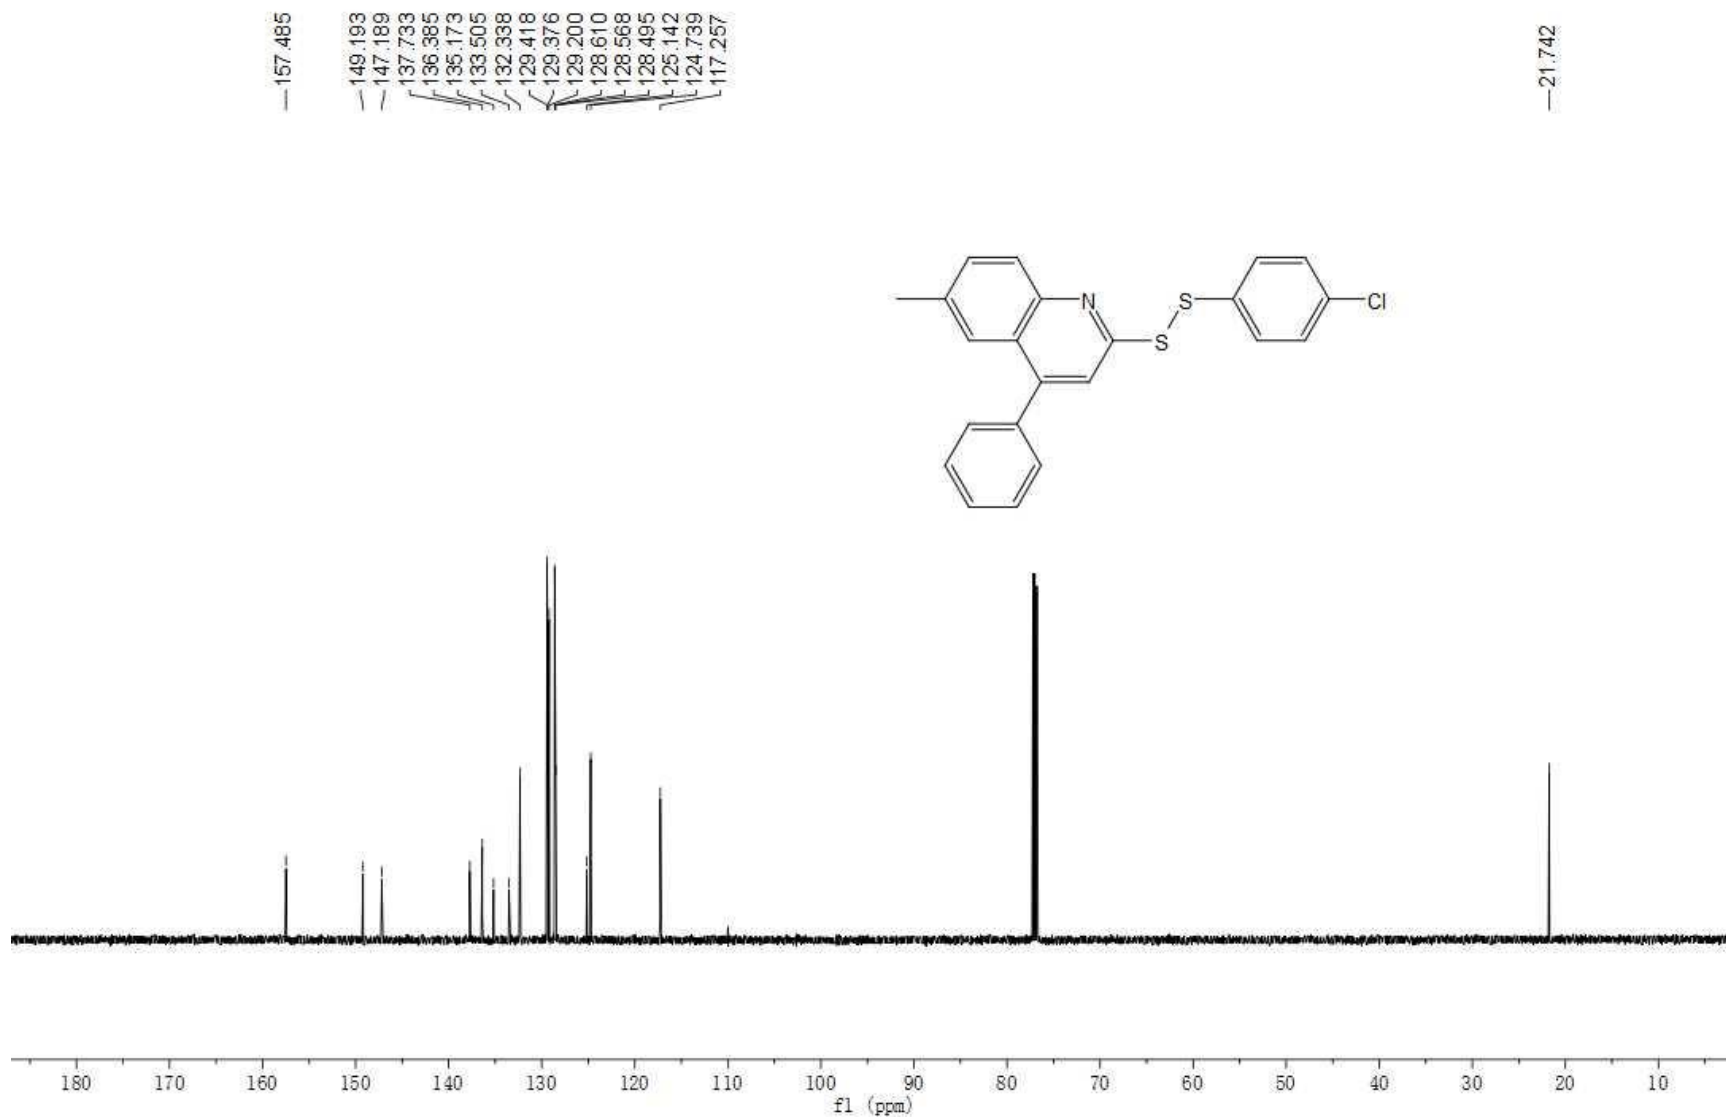

# <sup>1</sup>H and <sup>13</sup>C Spectra of compound 6c (CDCl<sub>3</sub>)

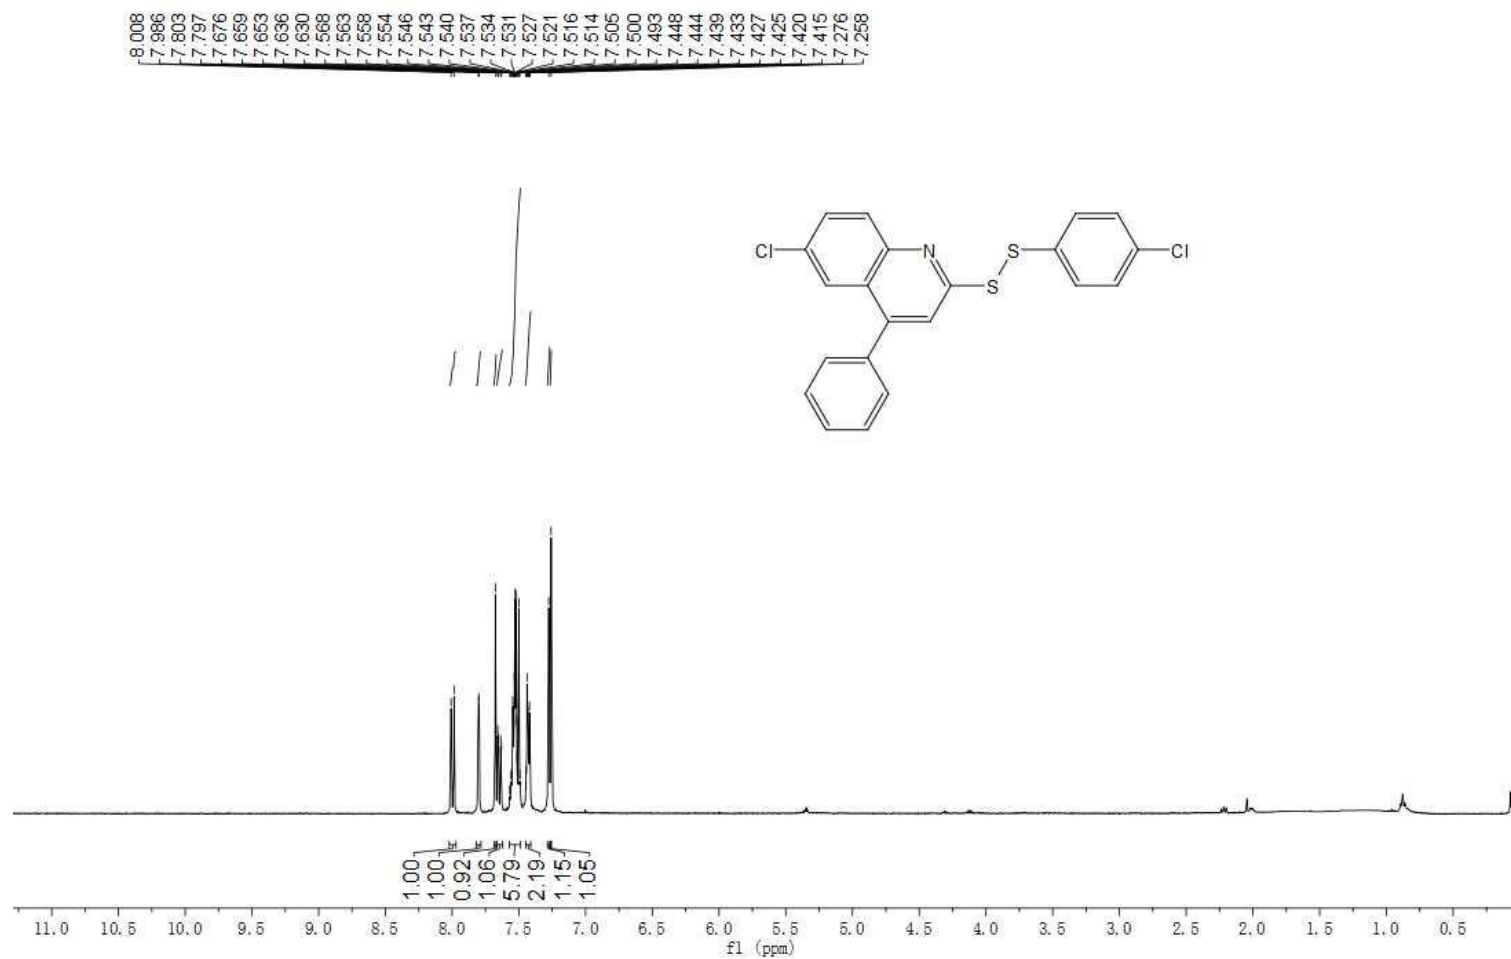

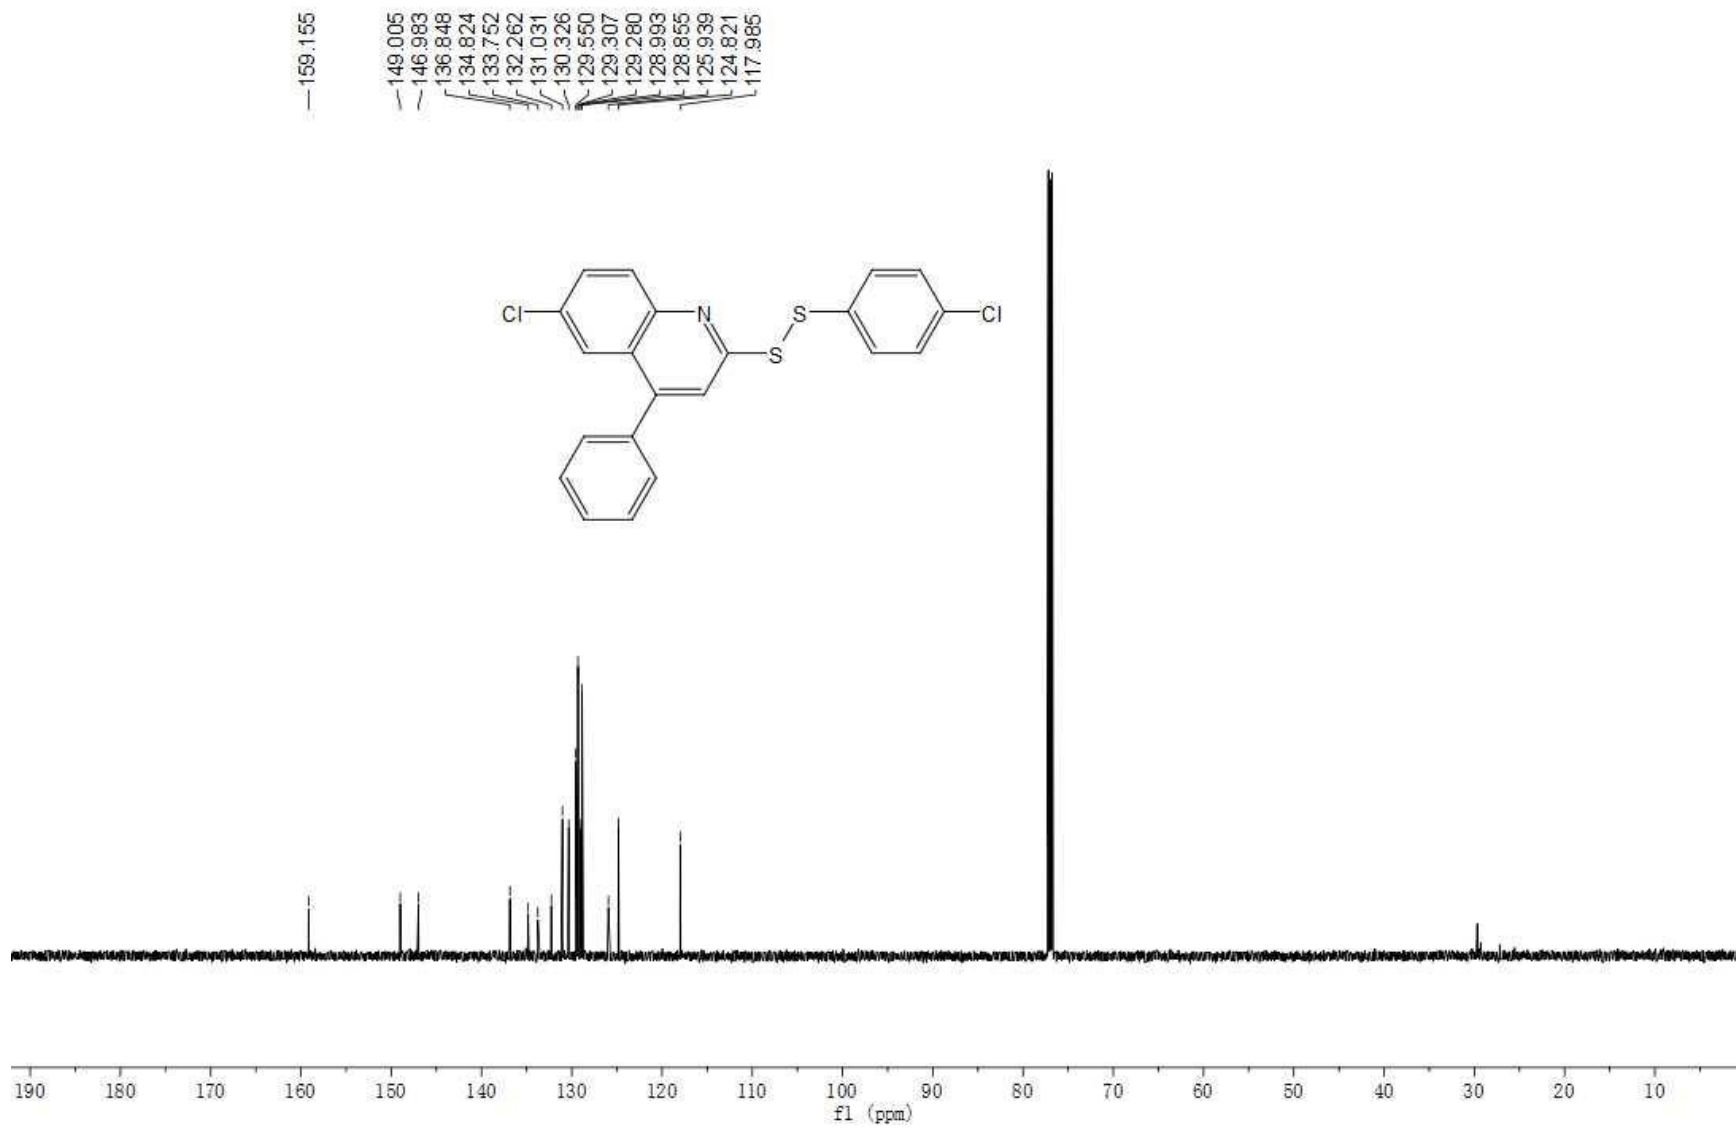

# <sup>1</sup>H and <sup>13</sup>C Spectra of compound 6d (CDCl<sub>3</sub>)

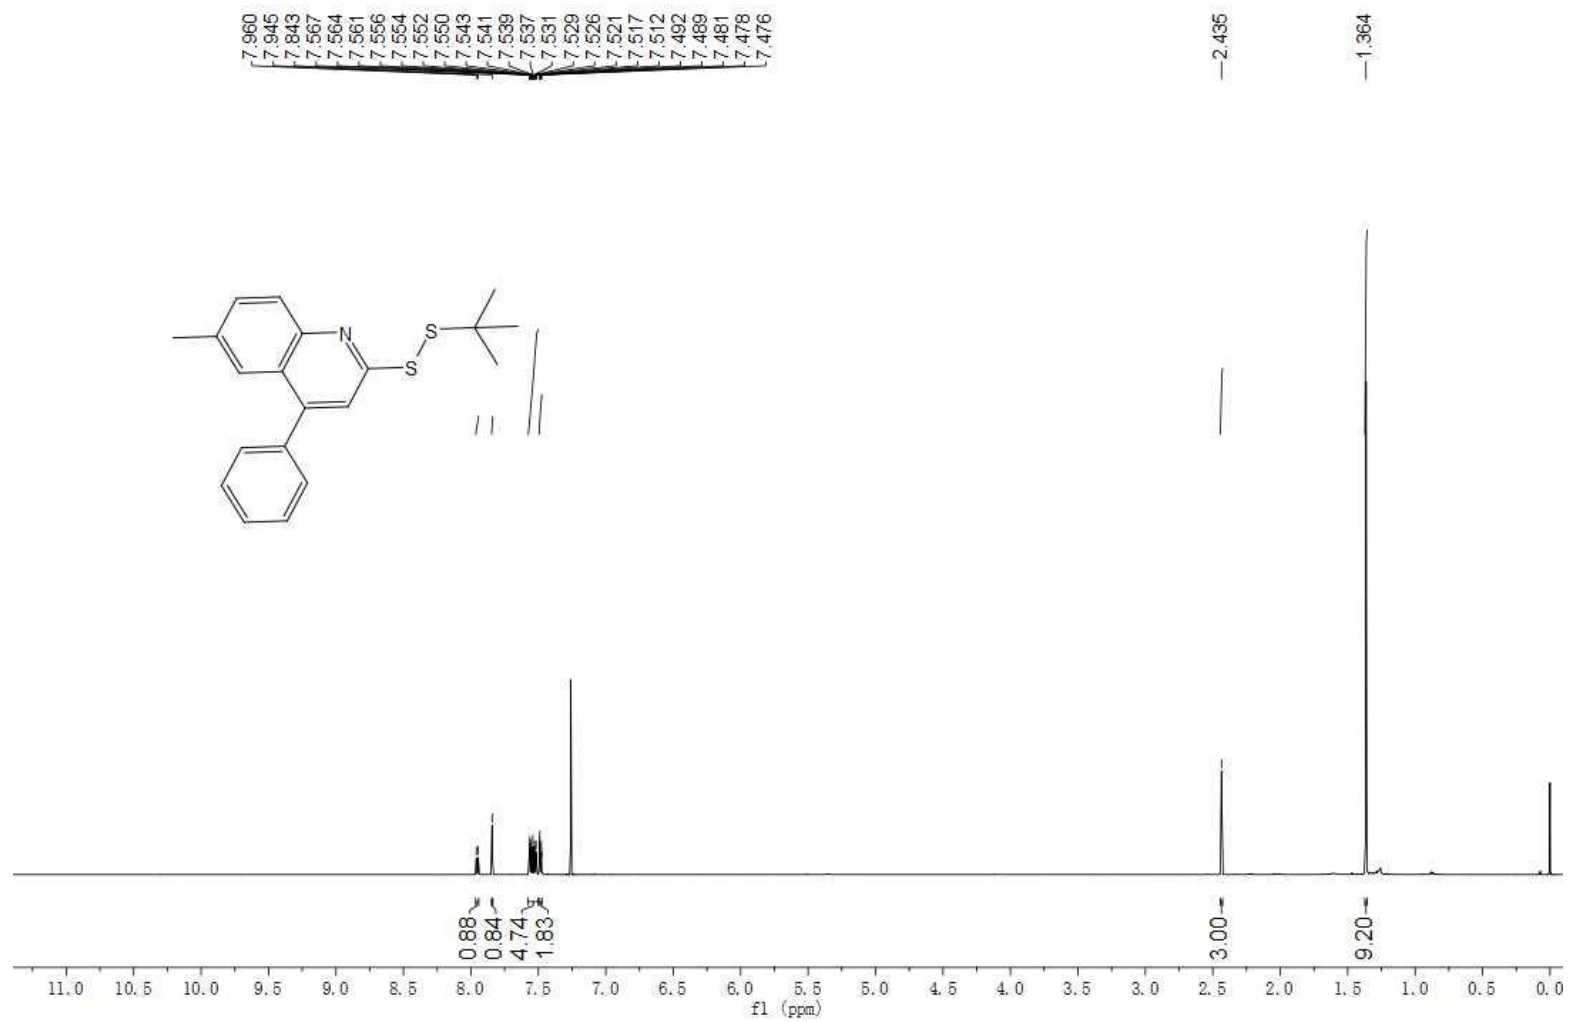

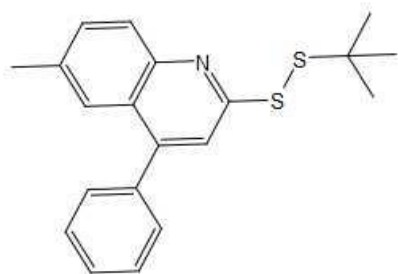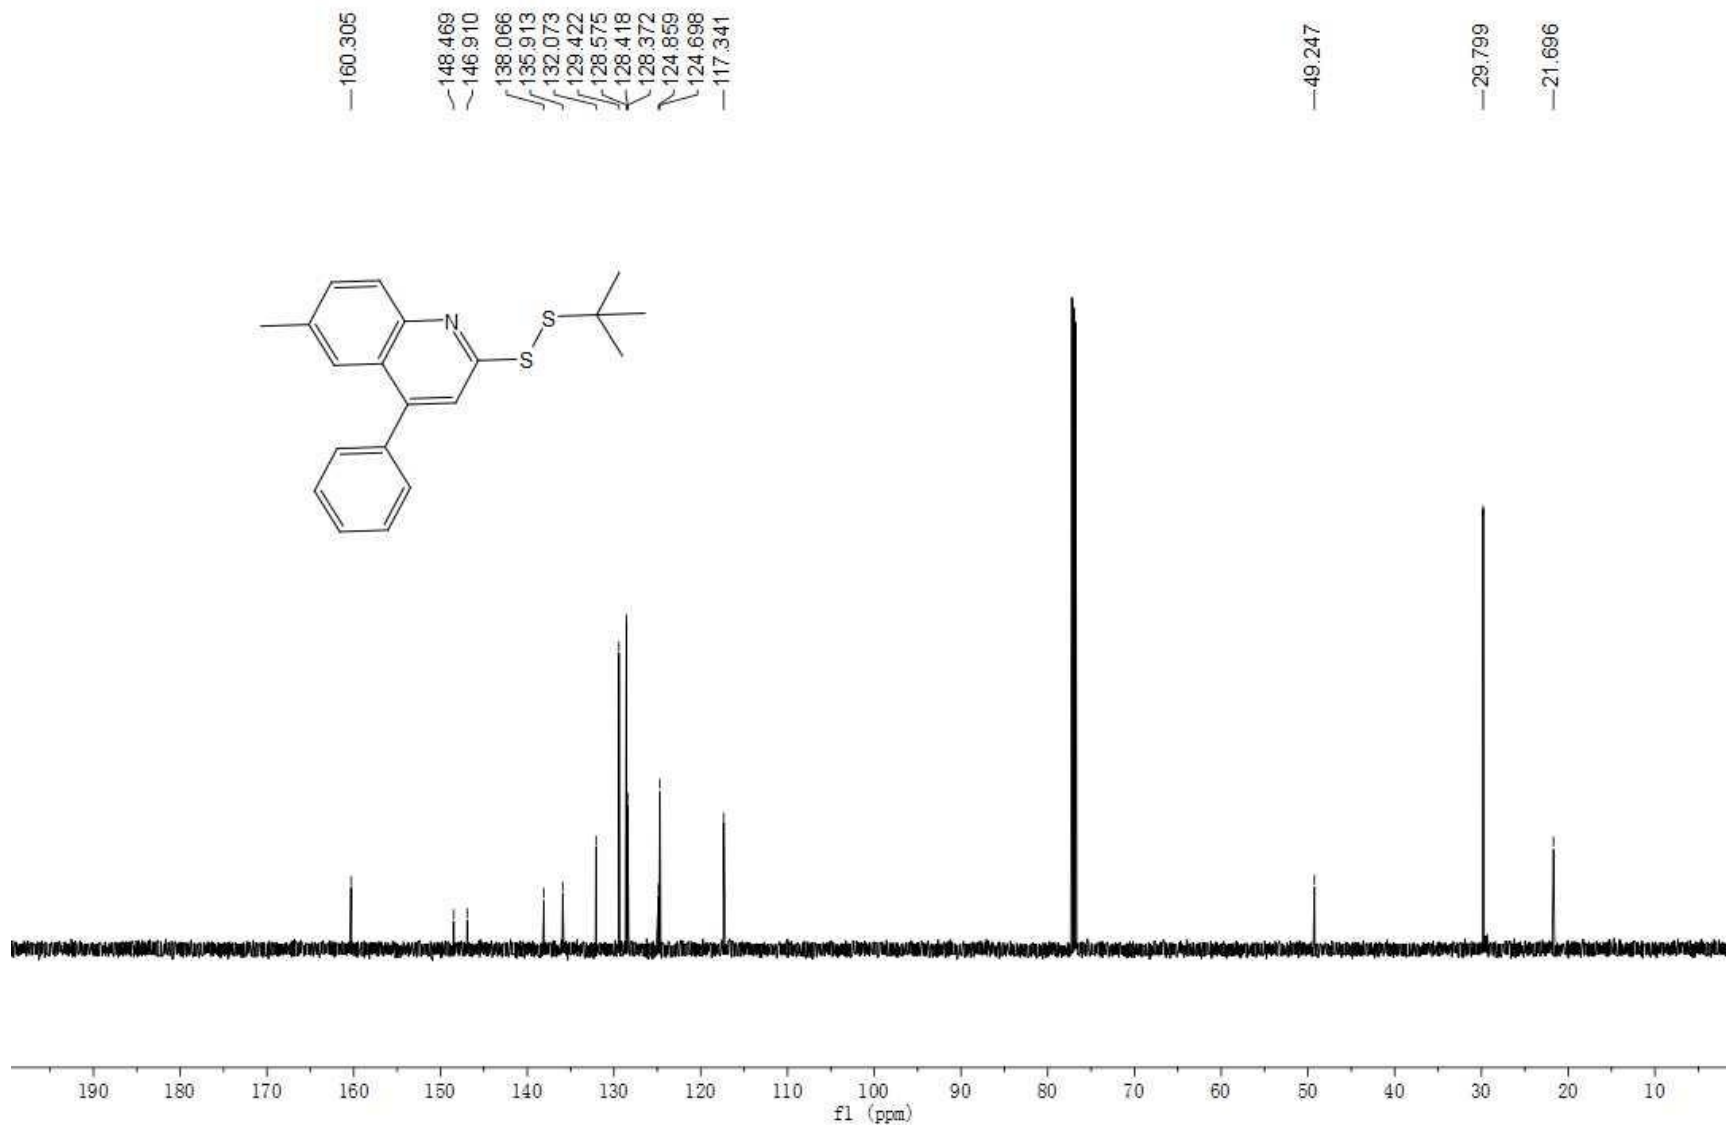

Supplement: c8ob02971g1.pdf [file c8ob02971g1.pdf]
